# Supplementary material for: Diastereoselective synthesis of glycopyrans 1,2-annulated with dioxazinanes from 1,2-anhydrosugars and N -substituted nitrones
Source: Royal Society of Chemistry journal article supplement (doi:10.1039/d1ob02310a), 2022-01-01

## Supporting Information

### Diastereoselective Synthesis of Glycopyrans 1,2-Annulated with Dioxazinanes from Anhydrosugars and N-substituted Nitrones

**Ajaz Ahmed,<sup>a,b</sup> Norein Sakander,<sup>a,b</sup> Faheem Rasool,<sup>a,c,d</sup> Nazar Hussain<sup>a,e</sup> and Debaraj Mukherjee<sup>\*a,b</sup>**

<sup>a</sup>Natural Product Chemistry Division, Indian Institute of Integrative Medicine (IIIM), Jammu, India.

<sup>b</sup>Academy of Scientific and Innovative Research (AcSIR-IIIM), Jammu-180001, India.

<sup>c</sup>*Department of Chemistry, Govt. College for Women, Parade Ground, Jammu-180001.*

<sup>d</sup>*Higher Education Department, Govt. of Jammu and Kashmir-India.*

<sup>e</sup>*Department of Medicinal Chemistry, Faculty of Ayurveda, Institute of Medical Sciences, Banaras Hindu University-Varanasi-221005.*

Email: [dmukherjee@iiim.ac.in](mailto:dmukherjee@iiim.ac.in), [dmukherje@iiim.res.in](mailto:dmukherje@iiim.res.in)

## Table of Contents for the Supporting Information

### Page no.

|                                                                                                            |                |
|------------------------------------------------------------------------------------------------------------|----------------|
| <b>1 Table for 2D correlations.....</b>                                                                    | <b>S3-S7</b>   |
| <b>2 NMR spectra.....</b>                                                                                  | <b>S8-S45</b>  |
| <b>3 labelled <math>^1\text{H}</math> and <math>^{13}\text{C}</math> NMR spectrum and 2D spectrum.....</b> | <b>S46-S60</b> |

### HSQC Correlation of 3a

|      | <sup>1</sup> H                         | <sup>13</sup> C |
|------|----------------------------------------|-----------------|
| H-1  | 4.97 (d, <i>J</i> = 7.8 Hz, 1H)        | 97.8            |
| H-2  | 3.50 (dd, <i>J</i> = 10.2, 7.8 Hz, 1H) | 76.7            |
| H-3  | 5.34 (t, <i>J</i> = 9.6 Hz, 1H)        | 71.4            |
| H-4  | 5.11 (t, <i>J</i> = 9.6 Hz, 1H)        | 68.9            |
| H-5  | 3.96 – 3.91 (m, 1H)                    | 74.0            |
| H-6a | 4.26 (dd, <i>J</i> = 12.4, 4.7 Hz, 1H) | 61.9            |
| H-6b | 4.19 (dd, <i>J</i> = 12.5, 2.1 Hz, 1H) | 61.9            |
| H-7  | 3.63 (s, 1H)                           | 97.4            |

### COSY Correlation of 3a

|      | <sup>1</sup> H                         | <sup>1</sup> H                                                          |
|------|----------------------------------------|-------------------------------------------------------------------------|
| H-1  | 4.97 (d, <i>J</i> = 7.8 Hz, 1H)        | 3.50 (dd, <i>J</i> = 10.2, 7.8 Hz, 1H)                                  |
| H-2  | 3.50 (dd, <i>J</i> = 10.2, 7.8 Hz, 1H) | 5.34 (t, <i>J</i> = 9.6 Hz, 1H), 3.50 (dd, <i>J</i> = 10.2, 7.8 Hz, 1H) |
| H-3  | 5.34 (t, <i>J</i> = 9.6 Hz, 1H)        | 3.50 (dd, <i>J</i> = 10.2, 7.8 Hz, 1H), 5.11 (t, <i>J</i> = 9.6 Hz, 1H) |
| H-4  | 5.11 (t, <i>J</i> = 9.6 Hz, 1H)        | 5.34 (t, <i>J</i> = 9.6 Hz, 1H), 3.96 – 3.91 (m, 1H)                    |
| H-5  | 3.96 – 3.91 (m, 1H)                    | 5.11 (t, <i>J</i> = 9.6 Hz, 1H), 4.26 (dd, <i>J</i> = 12.4, 4.7 Hz, 1H) |
| H-6a | 4.26 (dd, <i>J</i> = 12.4, 4.7 Hz, 1H) | 3.96 – 3.91 (m, 1H)                                                     |

### NOESY Correlation of 3a

|     | <sup>1</sup> H                  | <sup>1</sup> H                                                                               |
|-----|---------------------------------|----------------------------------------------------------------------------------------------|
| H-1 | 4.97 (d, <i>J</i> = 7.8 Hz, 1H) | 3.96 – 3.91 (m, 1H), 3.50 (dd, <i>J</i> = 10.2, 7.8 Hz, 1H), 5.34 (t, <i>J</i> = 9.6 Hz, 1H) |

|      |                                   |                                                                                                                       |
|------|-----------------------------------|-----------------------------------------------------------------------------------------------------------------------|
| H-2  | 3.50 (dd, $J = 10.2, 7.8$ Hz, 1H) | 3.63 (s, 1H)                                                                                                          |
| H-3  | 5.34 (t, $J = 9.6$ Hz, 1H)        | 3.50 (dd, $J = 10.2, 7.8$ Hz, 1H), 4.97 (d, $J = 7.8$ Hz, 1H), 3.96 – 3.91 (m, 1H)                                    |
| H-4  | 5.11 (t, $J = 9.6$ Hz, 1H)        | 3.50 (dd, $J = 10.2, 7.8$ Hz, 1H), 3.96 – 3.91 (m, 1H), 4.26 (dd, $J = 12.4, 4.7$ Hz, 1H), 5.34 (t, $J = 9.6$ Hz, 1H) |
| H-5  | 3.96 – 3.91 (m, 1H)               | 4.26 (dd, $J = 12.4, 4.7$ Hz, 1H), 4.97 (d, $J = 7.8$ Hz, 1H), 5.11 (t, $J = 9.6$ Hz, 1H)                             |
| H-6a | 4.26 (dd, $J = 12.4, 4.7$ Hz, 1H) | 3.96 – 3.91 (m, 1H)                                                                                                   |
| H-7  | 3.63 (s, 1H)                      | 3.50 (dd, $J = 10.2, 7.8$ Hz, 1H),                                                                                    |

### HSQC Correlation of compound 4b

|                             | $^1\text{H}$                       | $^{13}\text{C}$  |
|-----------------------------|------------------------------------|------------------|
| H-1, CH <sub>2</sub> of OBn | 4.89 – 4.81 (m, 3H)                | 99.3, 76.8       |
| H-7                         | 4.79 (s, 1H)                       | 98.6             |
| CH <sub>2</sub> of OBn      | 4.66 (dd, $J = 28.6, 11.8$ Hz, 2H) | 76.0, 75.1       |
| CH <sub>2</sub> of OBn      | 4.52 (dd, $J = 11.2, 9.1$ Hz, 2H)  | 76.8, 75.1       |
| H-3, H-4, H-6a, H-6b        | 3.85 – 3.72 (m, 4H)                | 82.6, 78.9, 70.0 |
| H-5                         | 3.68 (d, $J = 9.4$ Hz, 1H)         | 78.7             |
| H-2                         | 3.49 (t, $J = 8.5$ Hz, 1H)         | 81.8             |
| N-CH <sub>3</sub>           | 2.40 (s, 3H)                       | 42.3             |

### COSY Correlation of 4b

|  | $^1\text{H}$ | $^1\text{H}$ |
|--|--------------|--------------|
|--|--------------|--------------|

|        |                            |                                                  |
|--------|----------------------------|--------------------------------------------------|
| H-1    | 4.89 – 4.81 (m, 3H)        | 3.49 (t, $J = 8.5$ Hz, 1H)                       |
| H-2    | 3.49 (t, $J = 8.5$ Hz, 1H) | 3.49 (t, $J = 8.5$ Hz, 1H), 4.89 – 4.81 (m, 3H), |
| H-3    | 3.85 – 3.72 (m, 4H)        | 3.49 (t, $J = 8.5$ Hz, 1H), 3.85 – 3.72 (m, 4H)  |
| H-4    | 3.85 – 3.72 (m, 4H)        | 3.85 – 3.72 (m, 4H), 3.68 (d, $J = 9.4$ Hz, 1H)  |
| H-5    | 3.68 (d, $J = 9.4$ Hz, 1H) | 3.85 – 3.72 (m, 4H)                              |
| H-6a,b | 3.85 – 3.72 (m, 4H)        | 3.85 – 3.72 (m, 4H)                              |

#### NOESY Correlation of 4b

|     | <sup>1</sup> H             | <sup>1</sup> H                                  |
|-----|----------------------------|-------------------------------------------------|
| H-1 | 4.89 – 4.81 (m, 3H)        | 3.85 – 3.72 (m, 4H), 3.68 (d, $J = 9.4$ Hz, 1H) |
| H-2 | 3.49 (t, $J = 8.5$ Hz, 1H) | 3.85 – 3.72 (m, 4H), 4.79 (s, 1H)               |
| H-3 | 3.85 – 3.72 (m, 4H)        | 3.68 (d, $J = 9.4$ Hz, 1H), 4.89 – 4.81 (m, 3H) |
| H-4 | 3.85 – 3.72 (m, 4H)        | 3.49 (t, $J = 8.5$ Hz, 1H)                      |
| H-5 | 3.68 (d, $J = 9.4$ Hz, 1H) | 3.85 – 3.72 (m, 4H), 4.89 – 4.81 (m, 3H)        |
| H-7 | 4.79 (s, 1H)               | 2.40 (s, 1H), 3.49 (t, $J = 8.5$ Hz, 1H)        |

#### HSQC Correlation of 4j

|     | <sup>1</sup> H             | <sup>13</sup> C |
|-----|----------------------------|-----------------|
| H-1 | 4.80 (d, $J = 7.6$ Hz, 1H) | 99.0            |

|        |                                   |      |
|--------|-----------------------------------|------|
| H-2    | 4.01 (dd, $J = 10.3, 7.7$ Hz, 1H) | 77.7 |
| H-3    | 3.78 (t, $J = 6.4$ Hz, 1H)        | 75.9 |
| H-4    | 3.70 – 3.63 (m, 3H)               | 78.1 |
| H-5    | 3.97 (d, $J = 2.1$ Hz, 1H)        | 74.6 |
| H-6a,b | 3.70 – 3.63 (m, 3H)               | 68.2 |
| H-7    | 4.83 (s, 1H)                      | 97.8 |

**COSY Correlation of 4j**

|        | <sup>1</sup> H                    | <sup>1</sup> H                    |
|--------|-----------------------------------|-----------------------------------|
| H-1    | 4.80 (d, $J = 7.6$ Hz, 1H)        | 4.01 (dd, $J = 10.3, 7.7$ Hz, 1H) |
| H-2    | 4.01 (dd, $J = 10.3, 7.7$ Hz, 1H) | 3.78 (t, $J = 6.4$ Hz, 1H)        |
| H-3    | 3.78 (t, $J = 6.4$ Hz, 1H)        | 3.70 – 3.63 (m, 3H)               |
| H-4    | 3.70 – 3.63 (m, 3H)               | 3.97 (d, $J = 2.1$ Hz, 1H)        |
| H-5    | 3.97 (d, $J = 2.1$ Hz, 1H)        | 3.70 – 3.63 (m, 3H)               |
| H-6a,b | 3.70 – 3.63 (m, 3H)               | 3.97 (d, $J = 2.1$ Hz, 1H)        |

**NOESY Correlation of 4j**

|     | <sup>1</sup> H             | <sup>1</sup> H                                  |
|-----|----------------------------|-------------------------------------------------|
| H-1 | 4.80 (d, $J = 7.6$ Hz, 1H) | 5.34 (t, $J = 9.6$ Hz, 1H), 3.96 – 3.91 (m, 1H) |

|     |                                   |                                                        |
|-----|-----------------------------------|--------------------------------------------------------|
| H-2 | 4.01 (dd, $J = 10.3, 7.7$ Hz, 1H) | 4.83 (s, 1H)                                           |
| H-3 | 3.78 (t, $J = 6.4$ Hz, 1H)        | 4.80 (d, $J = 7.6$ Hz, 1H), 3.97 (d, $J = 2.1$ Hz, 1H) |
| H-4 | 3.70 – 3.63 (m, 3H)               | -----                                                  |
| H-5 | 3.97 (d, $J = 2.1$ Hz, 1H)        | 3.78 (t, $J = 6.4$ Hz, 1H), 4.80 (d, $J = 7.6$ Hz, 1H) |
| H-7 | 4.83 (s, 1H)                      | 4.01 (dd, $J = 10.3, 7.7$ Hz, 1H)                      |

<sup>1</sup>H NMR (400 MHz) and <sup>13</sup>C NMR (126 MHz) of compound 3a

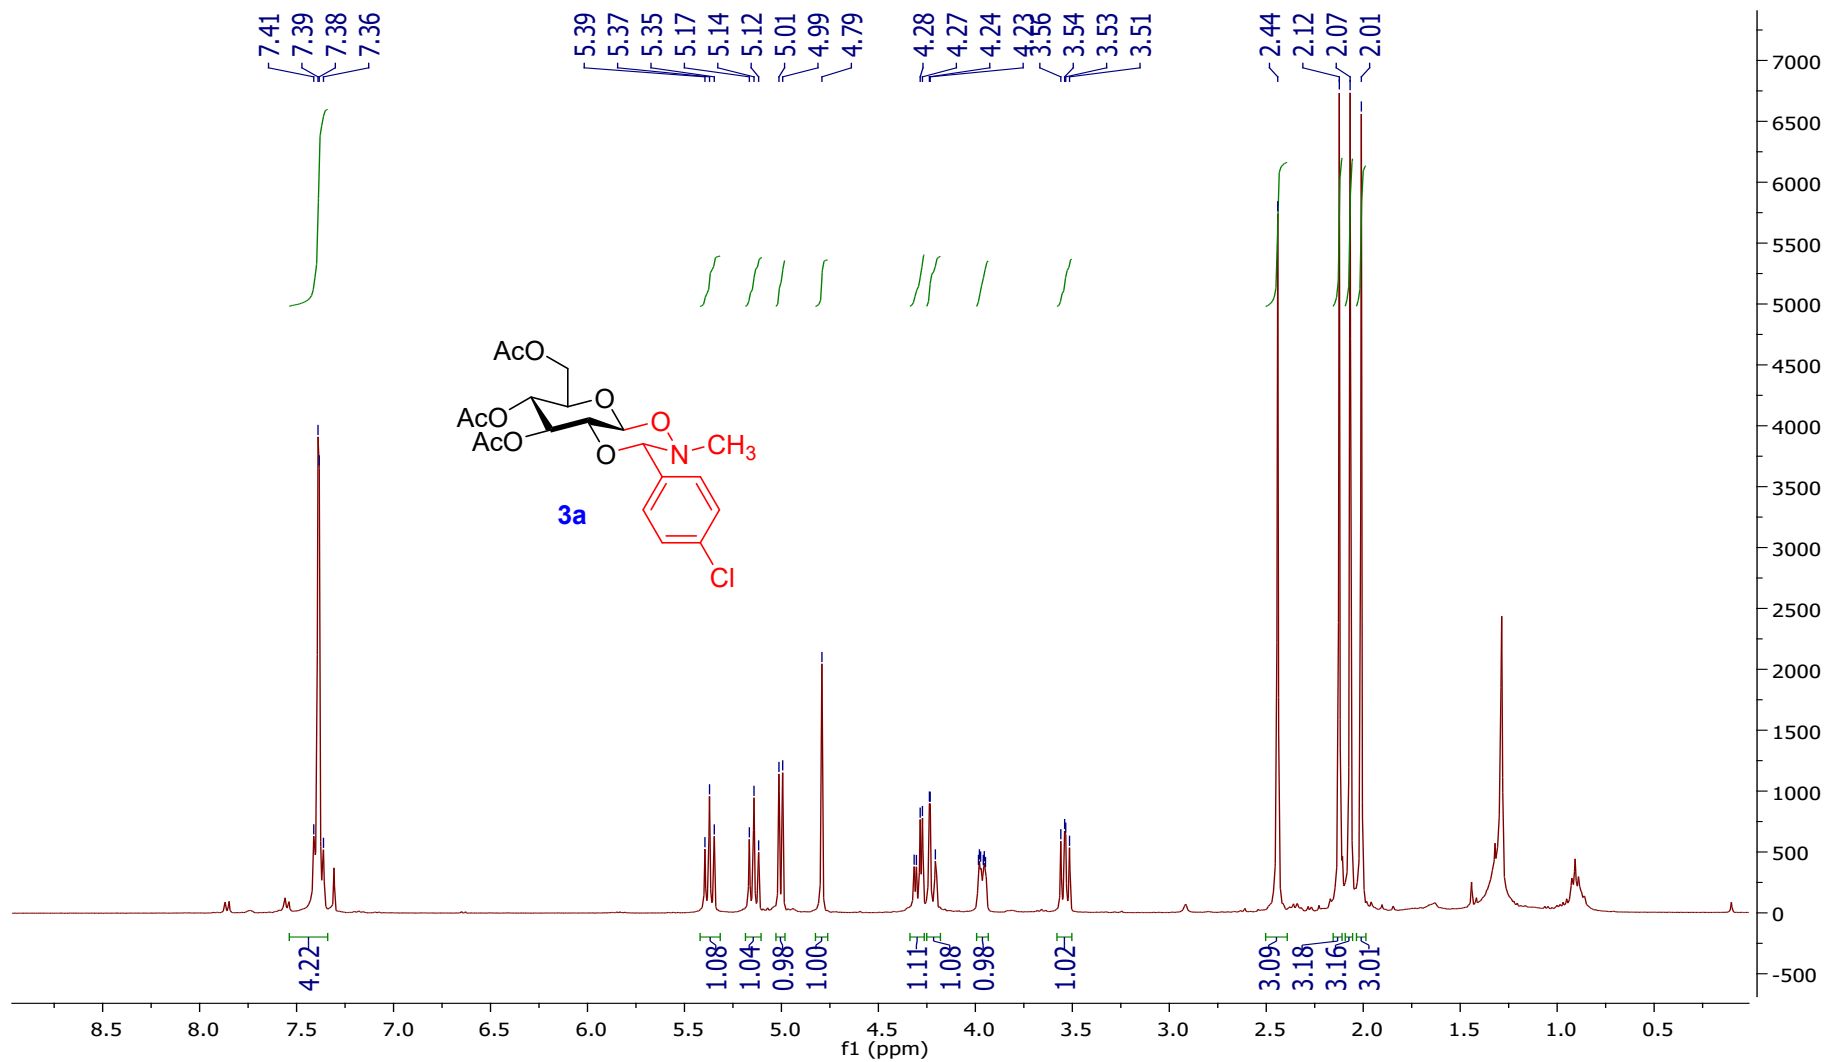



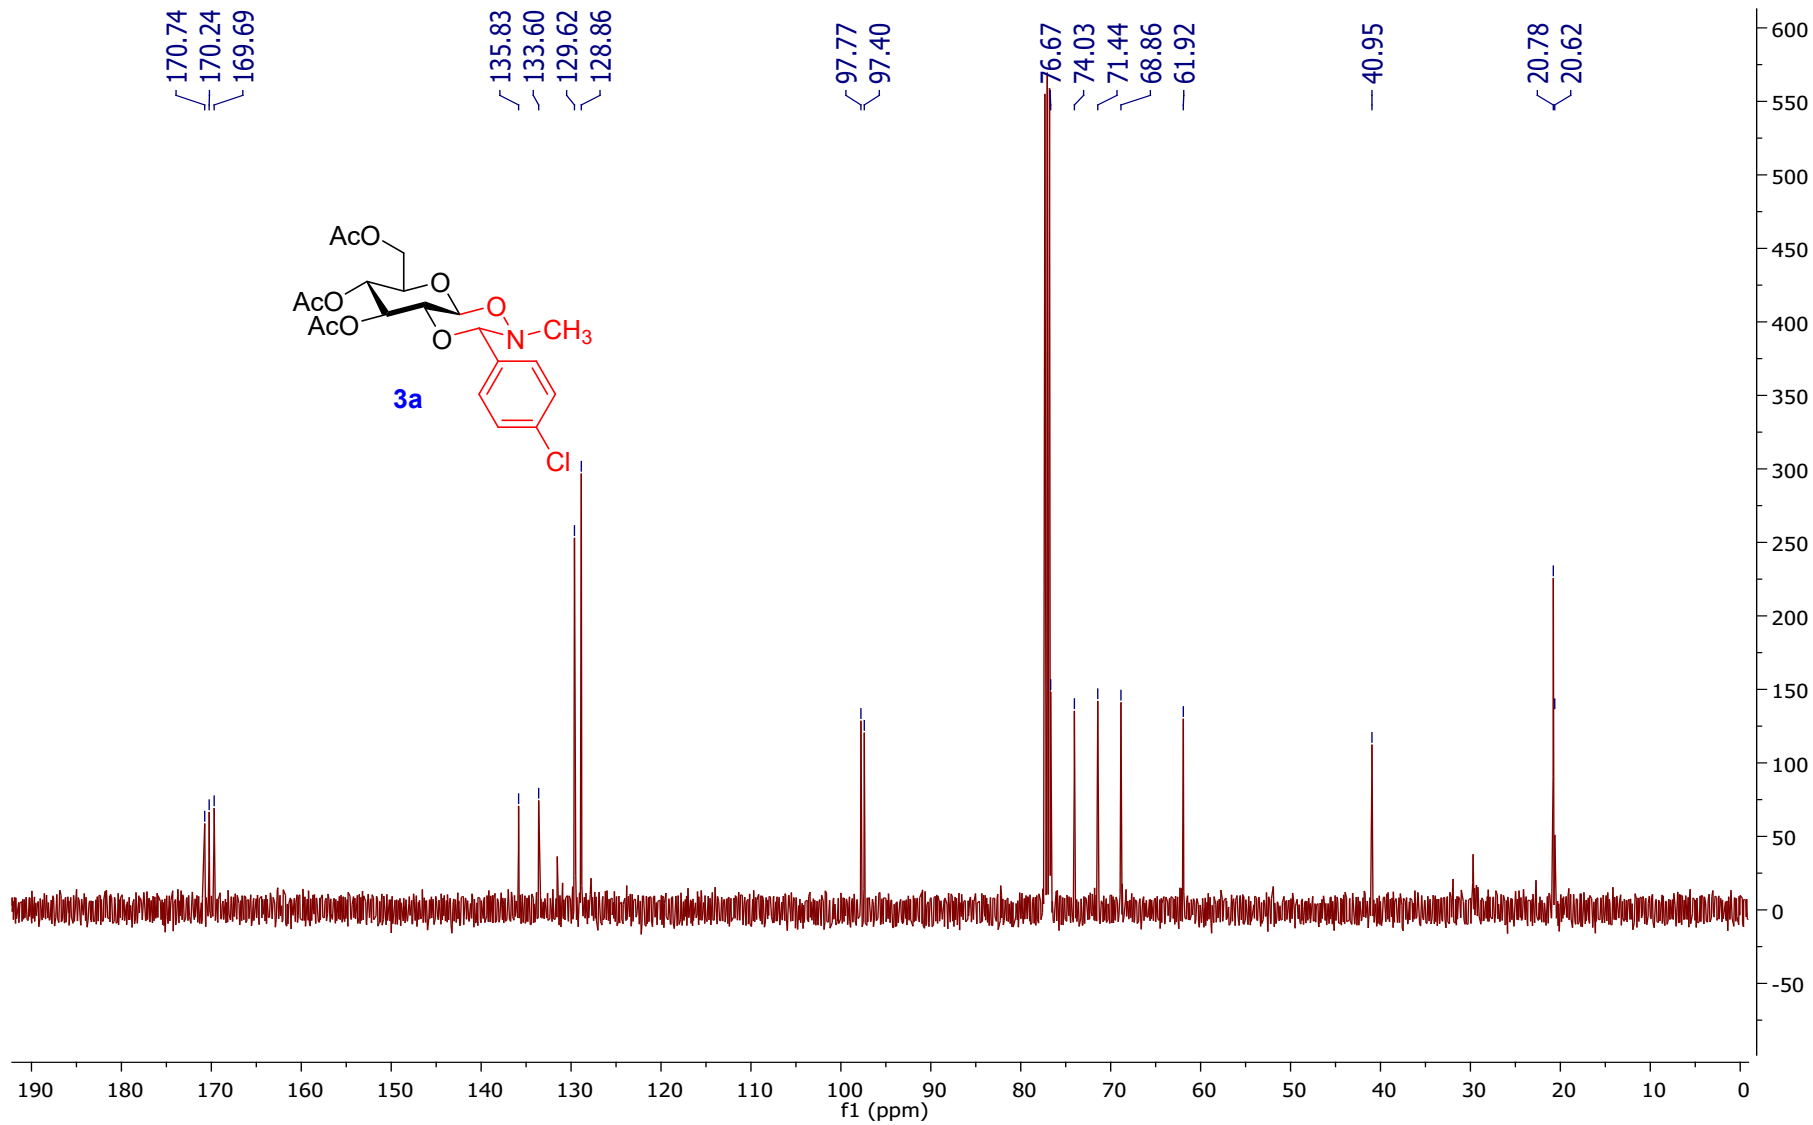

**<sup>1</sup>H NMR (400 MHz) and <sup>13</sup>C NMR (101 MHz) of compound 3aa**

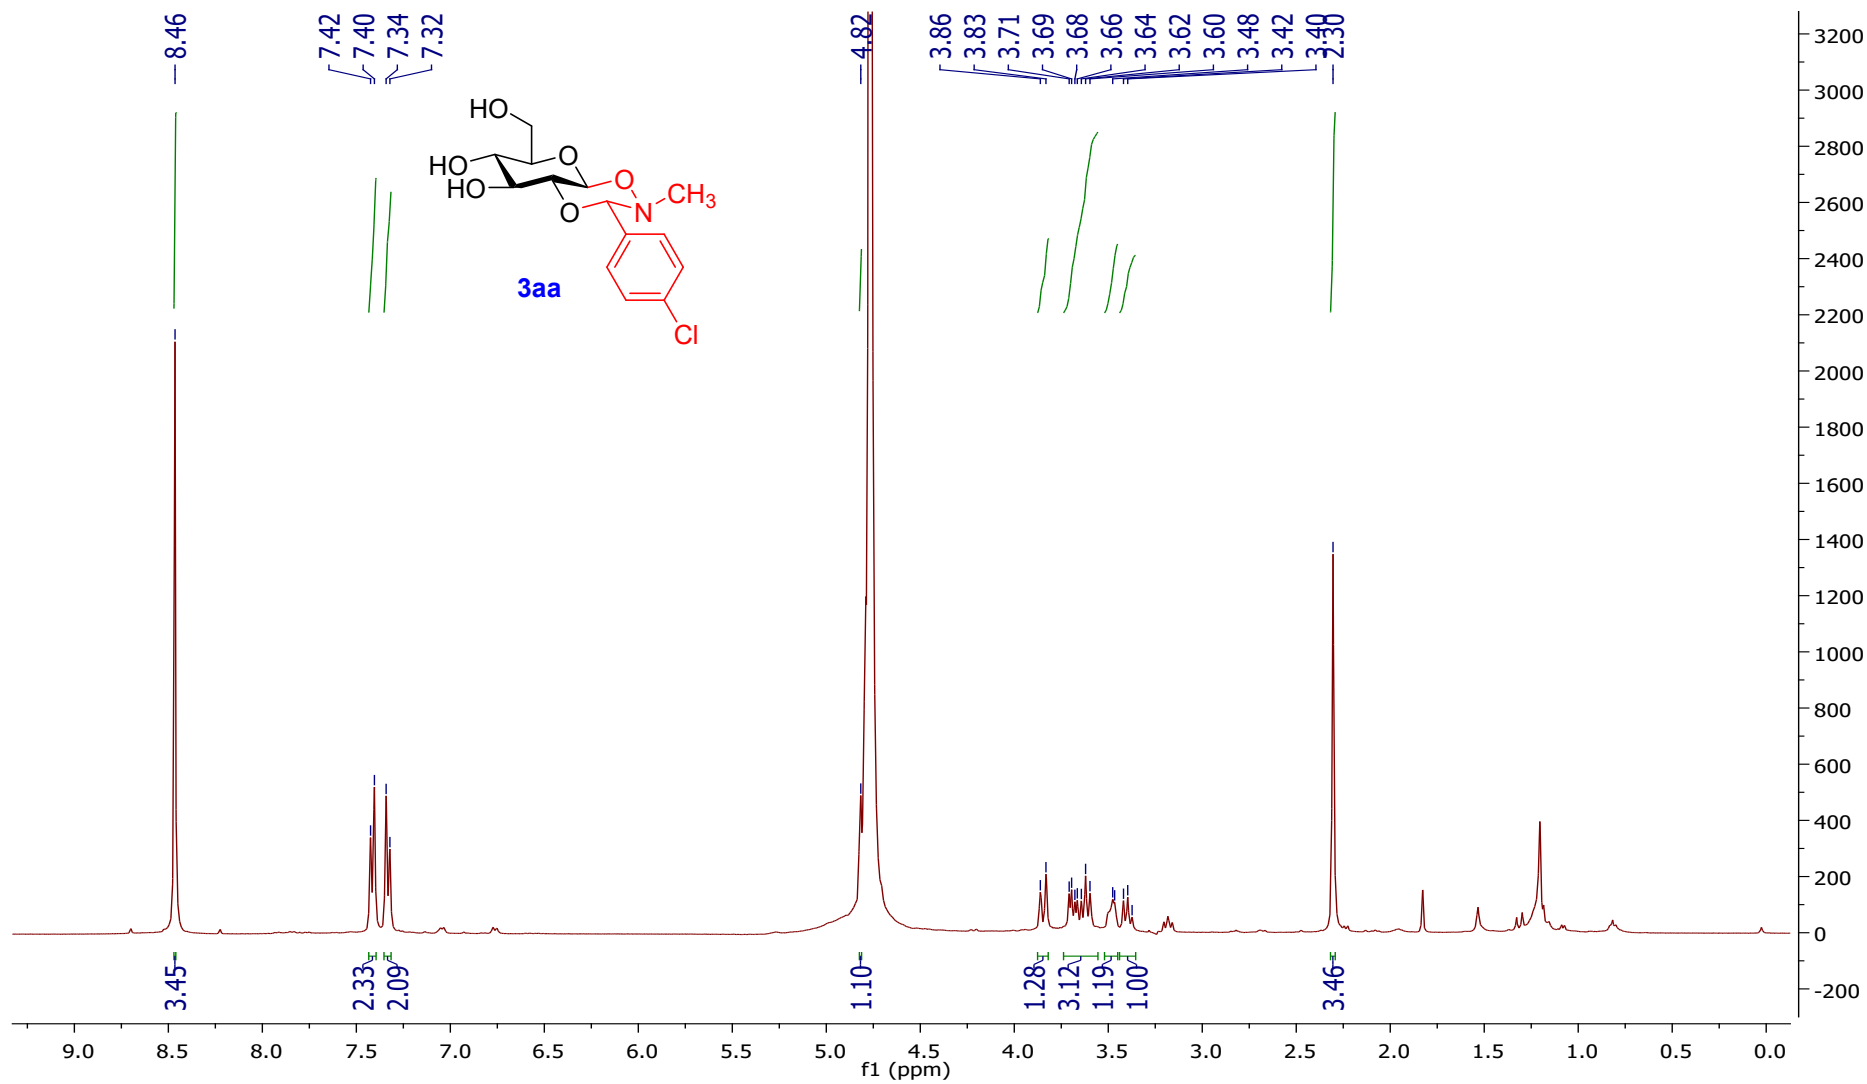

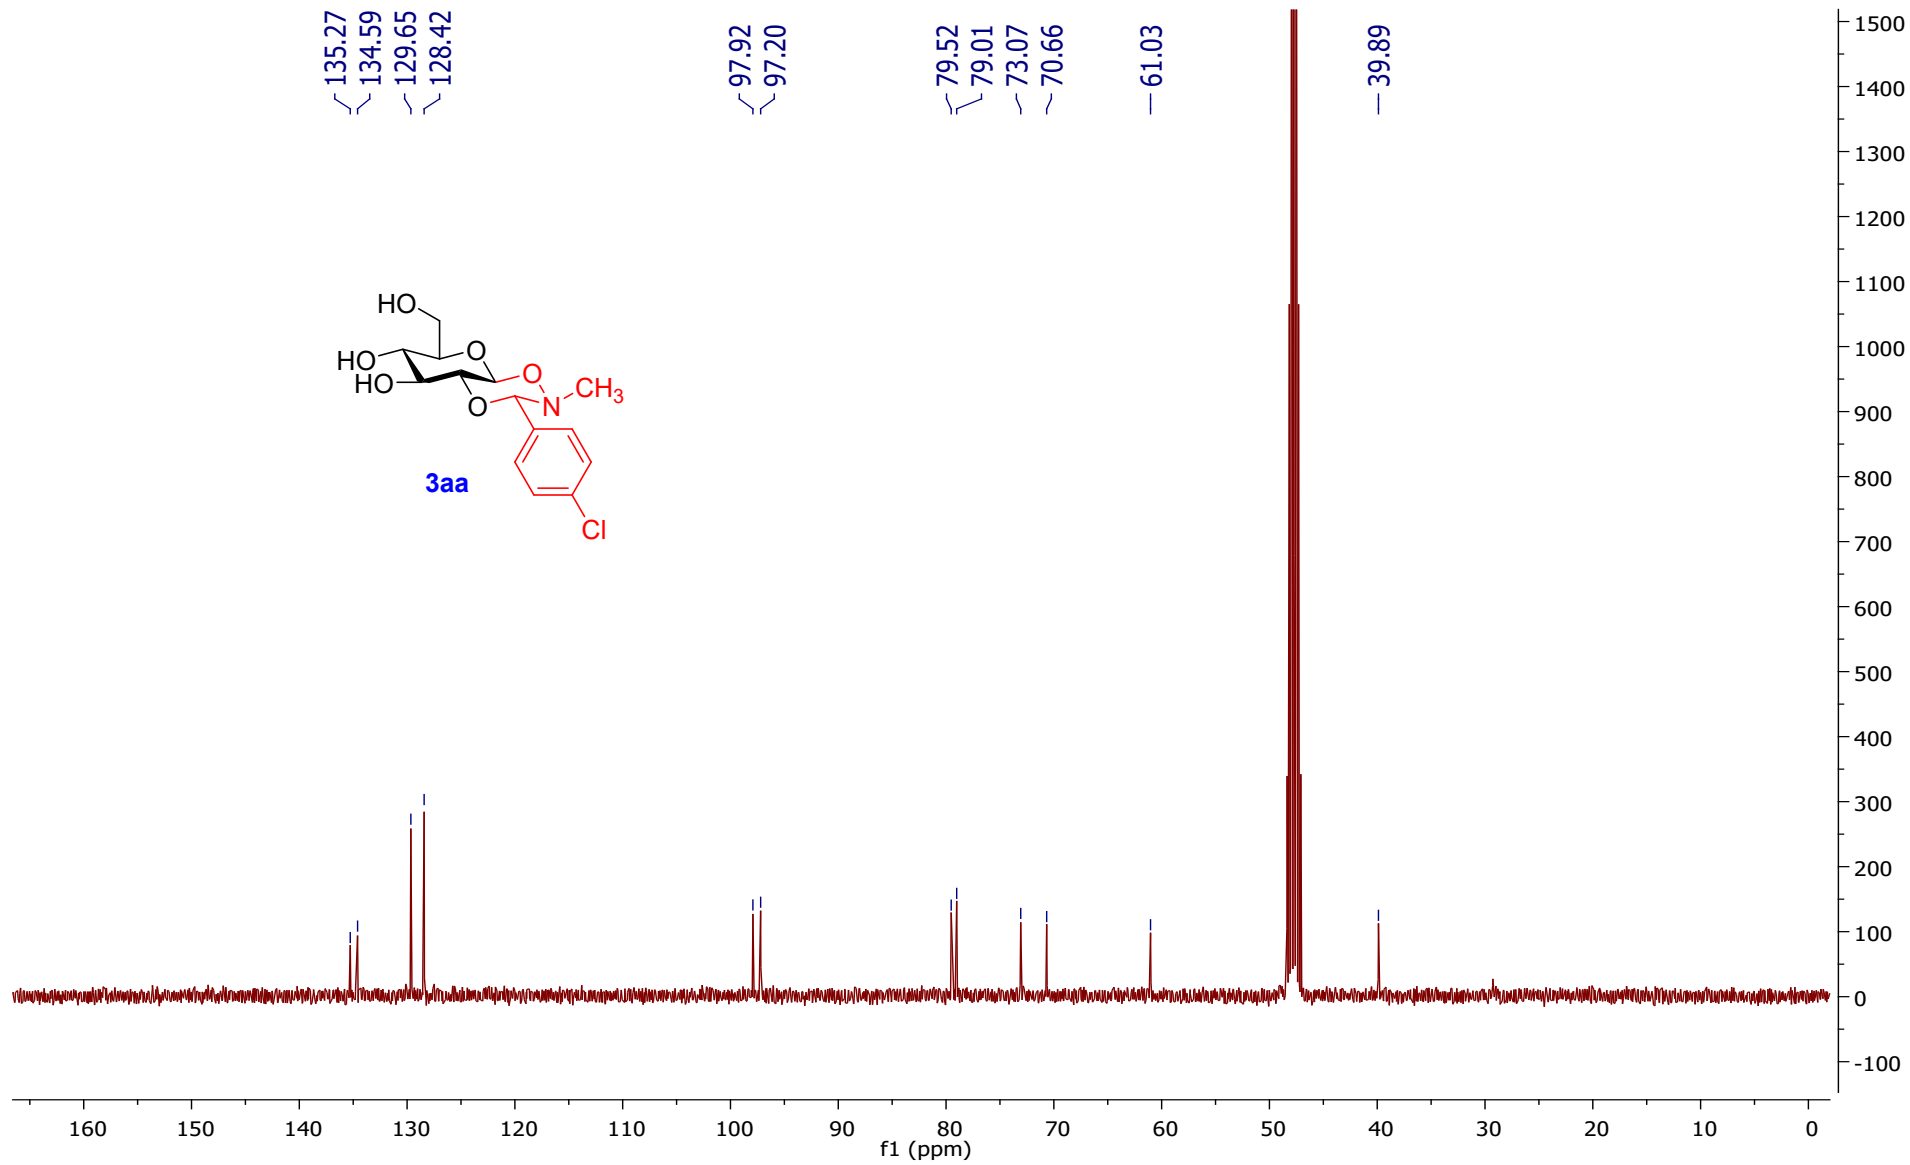

**<sup>1</sup>H NMR (400 MHz) and <sup>13</sup>C NMR (101 MHz) of compound 3b**

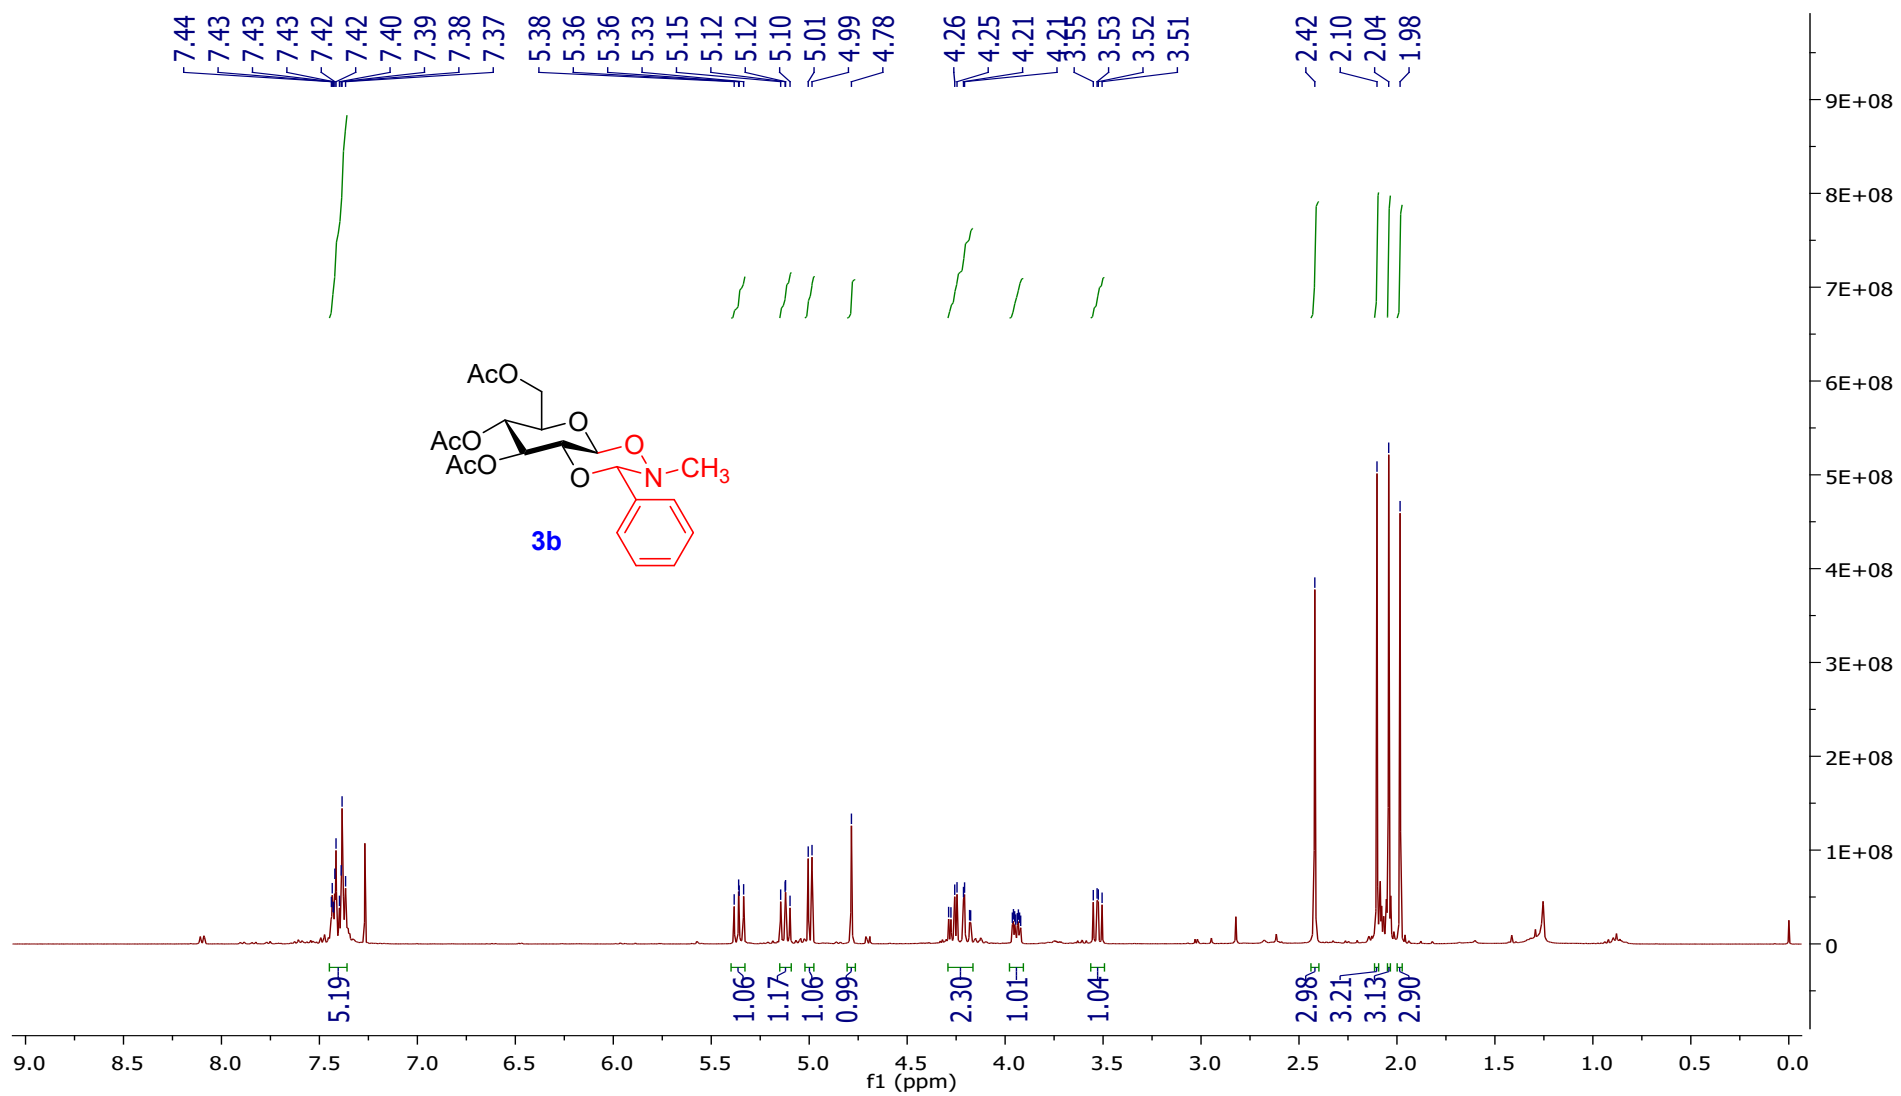

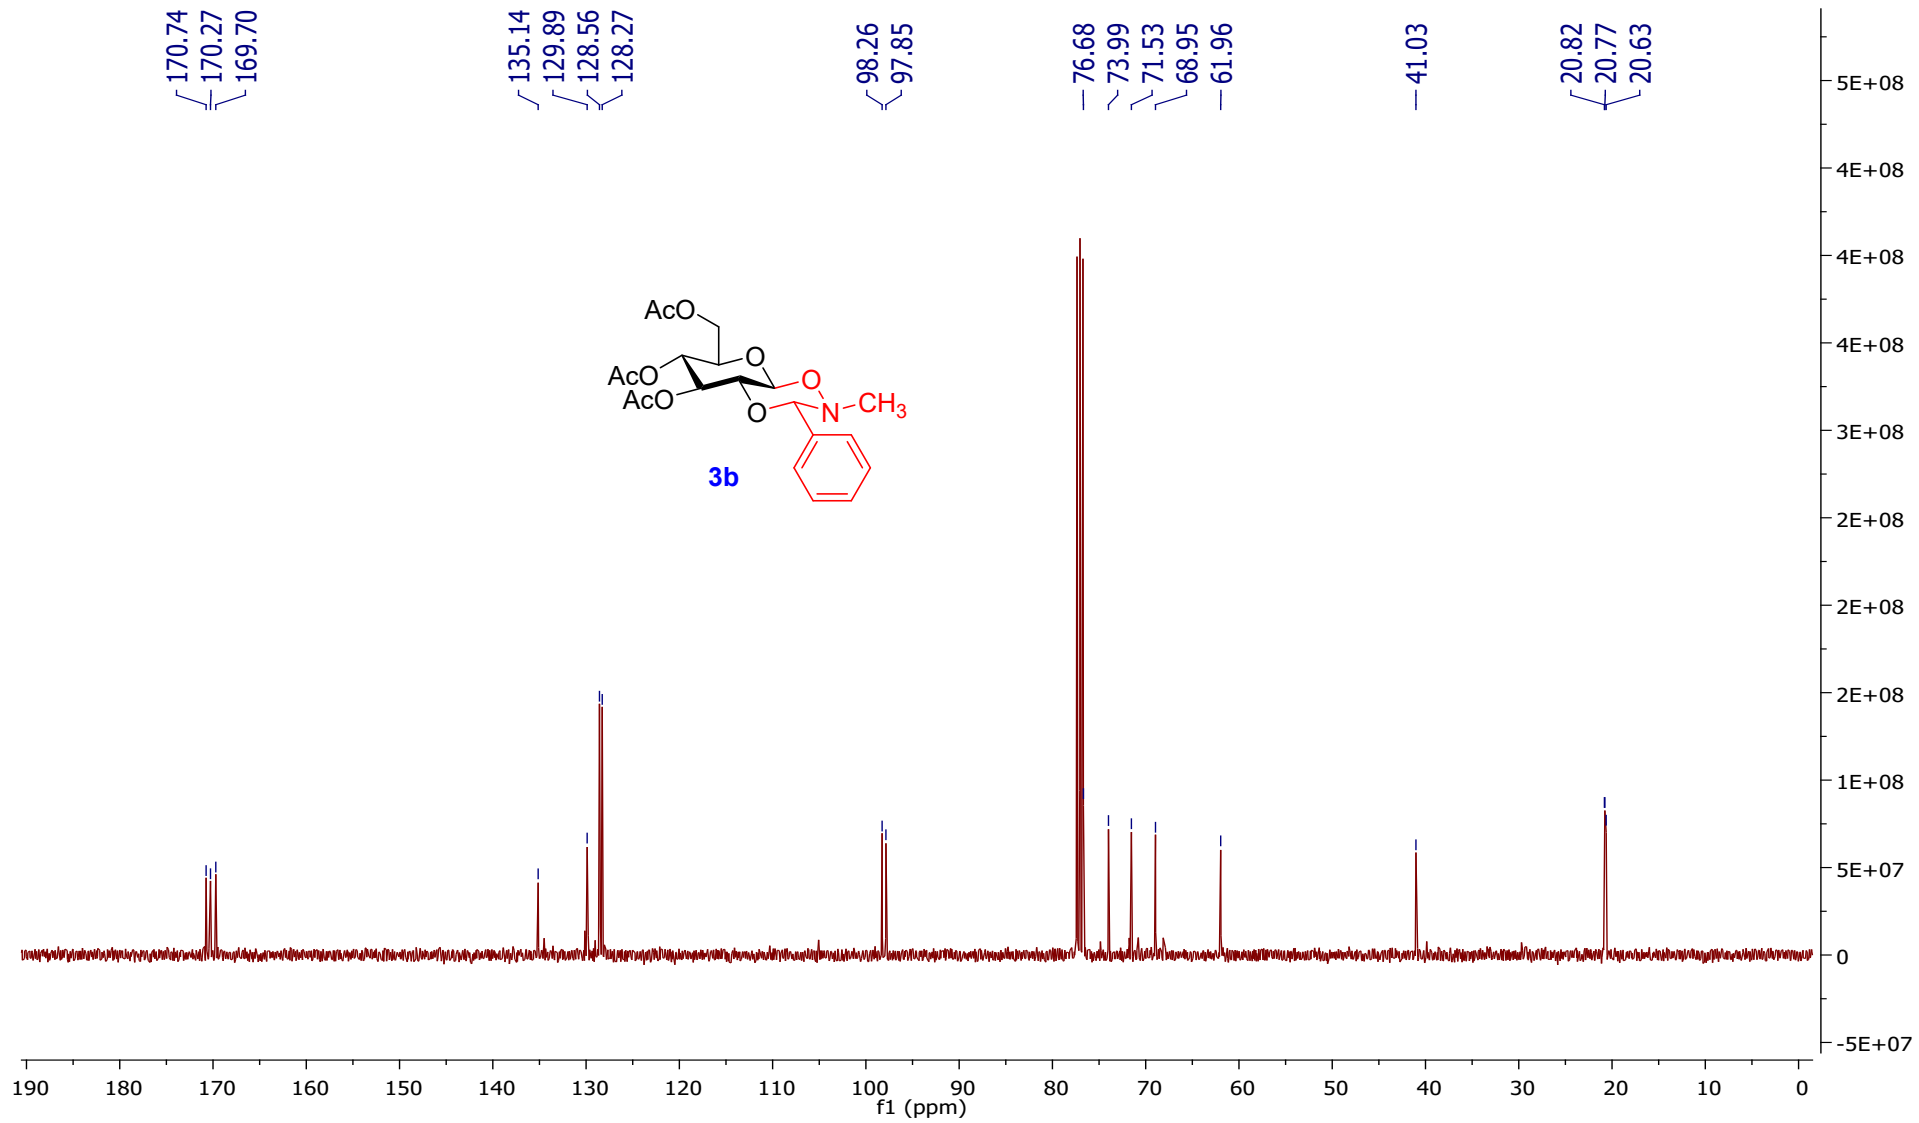

**<sup>1</sup>H NMR (400 MHz) and <sup>13</sup>C NMR (101 MHz) of compound 3c**

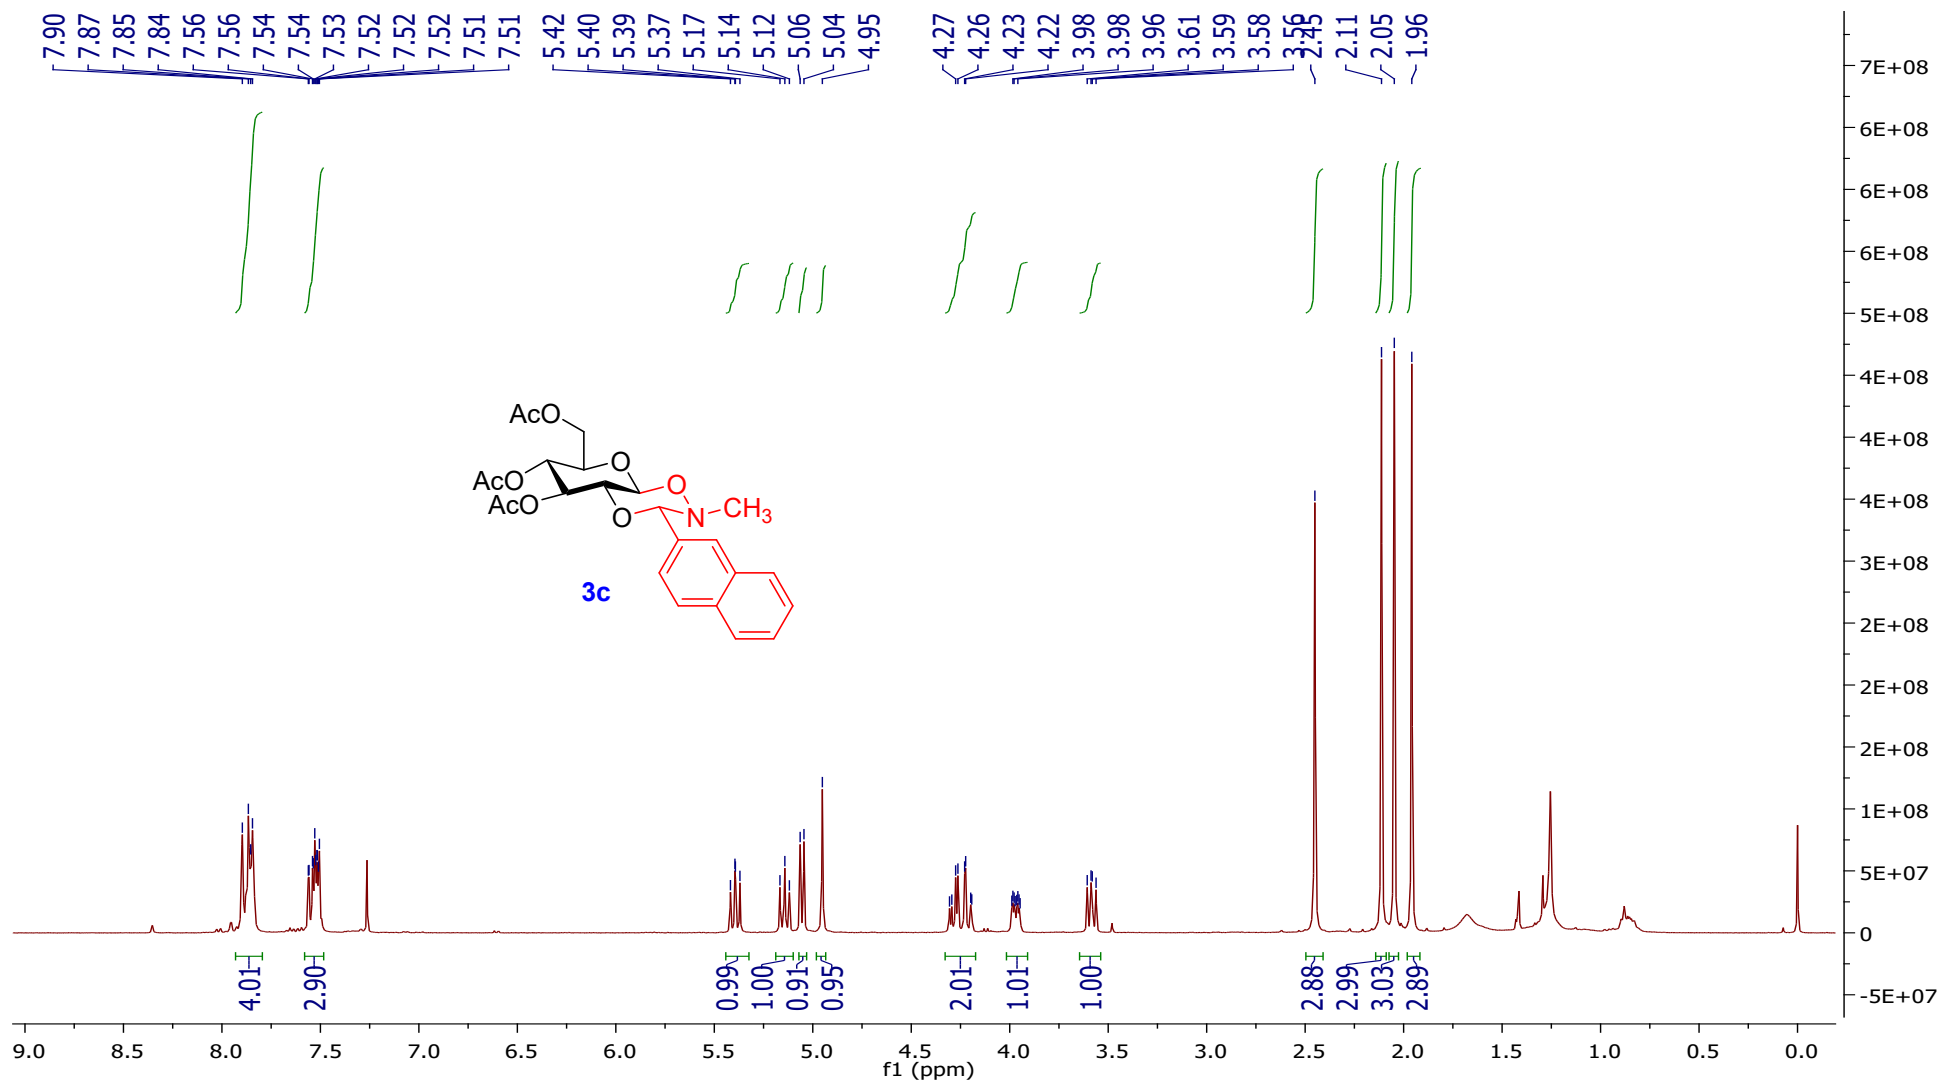

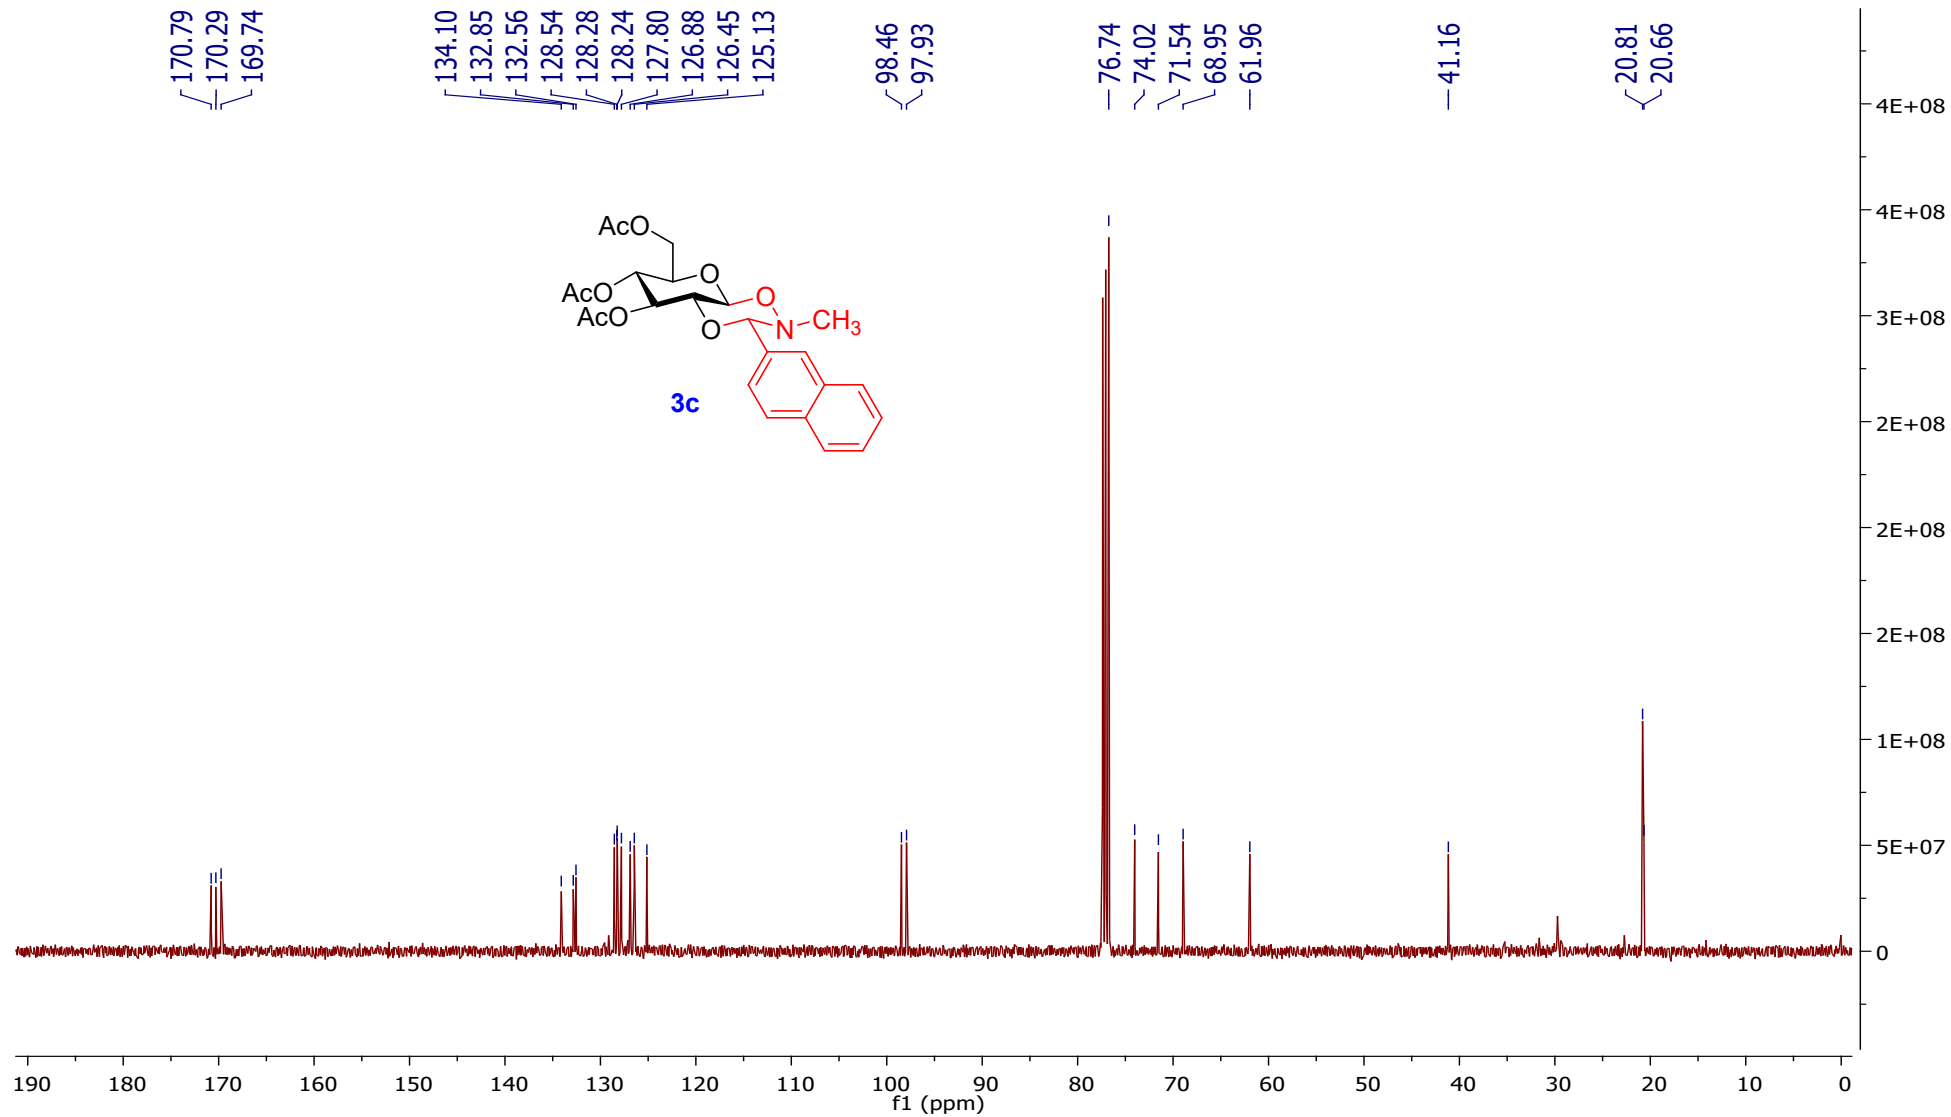

**<sup>1</sup>H NMR (400 MHz) and <sup>13</sup>C NMR (101 MHz) of compound 3d**

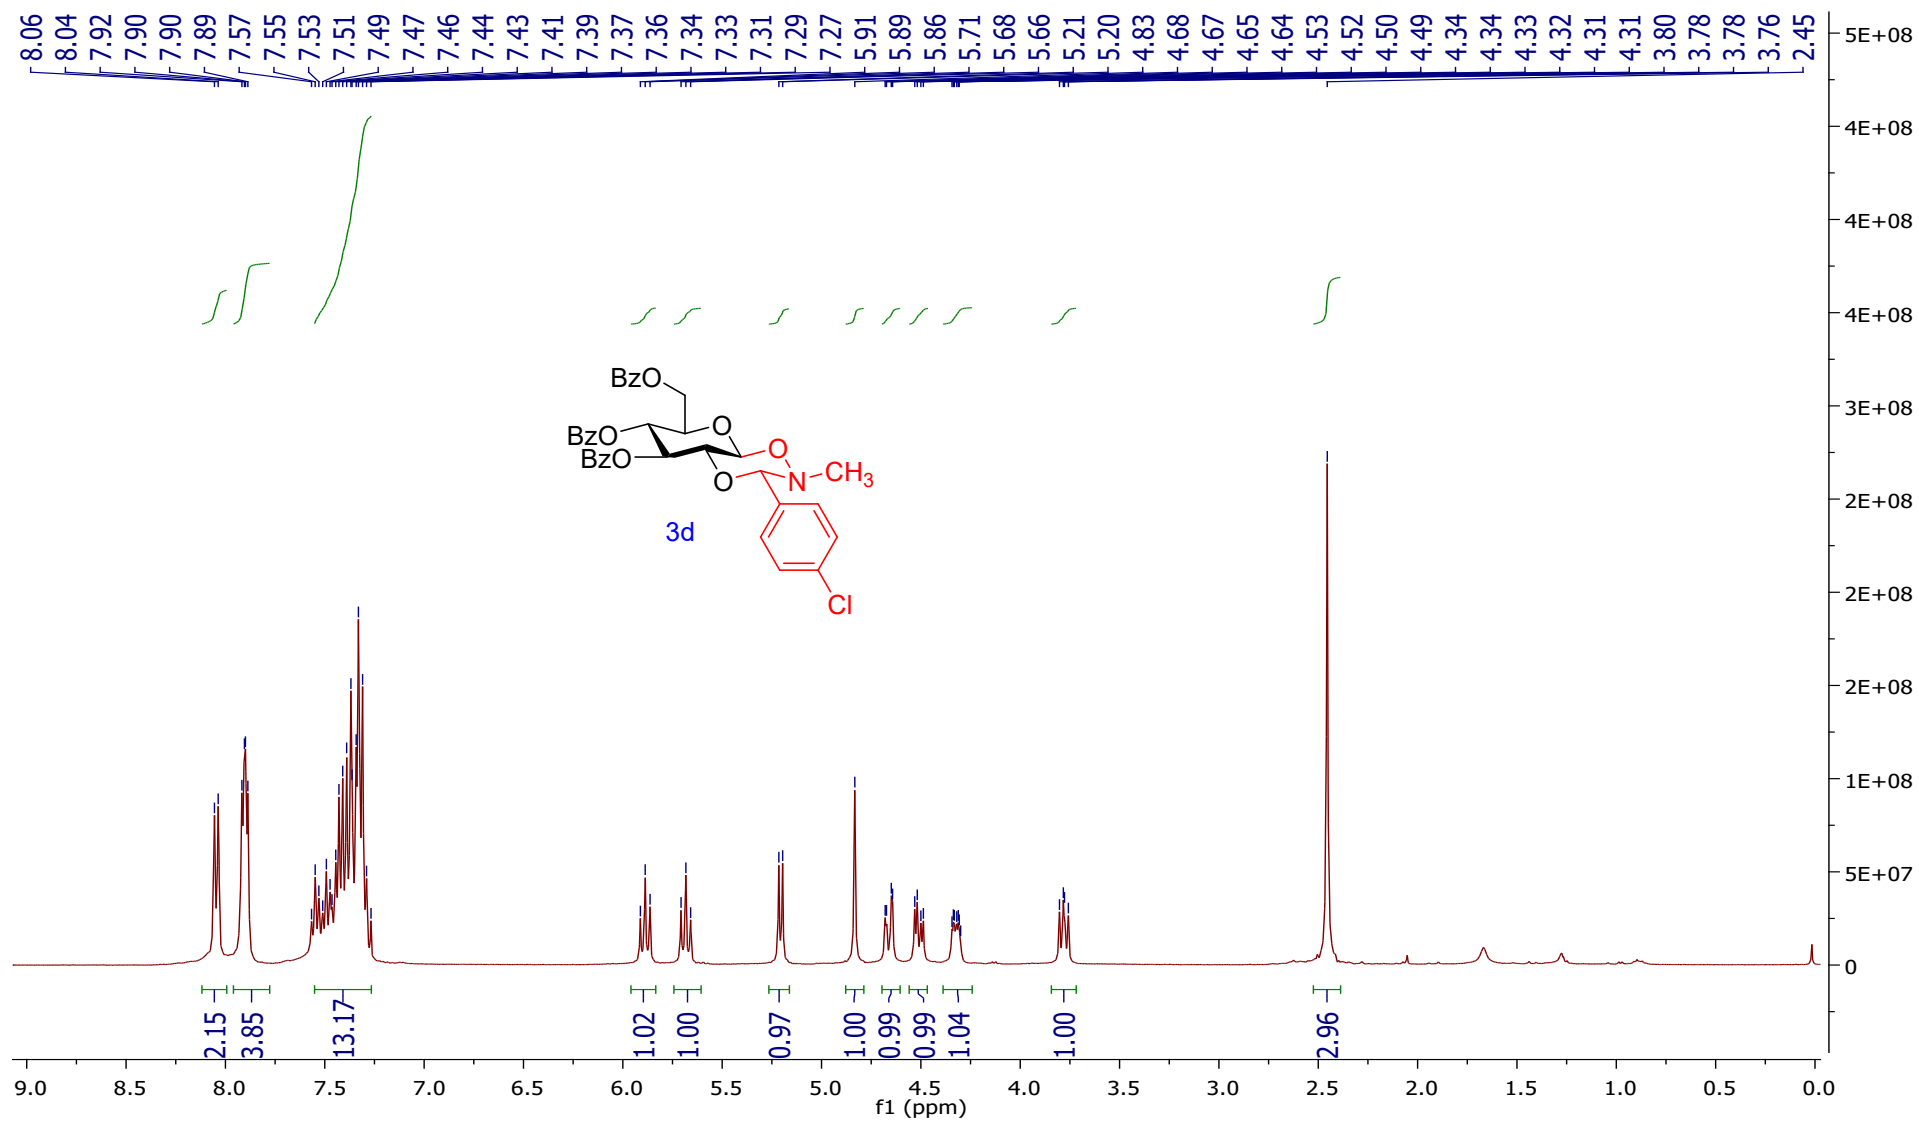



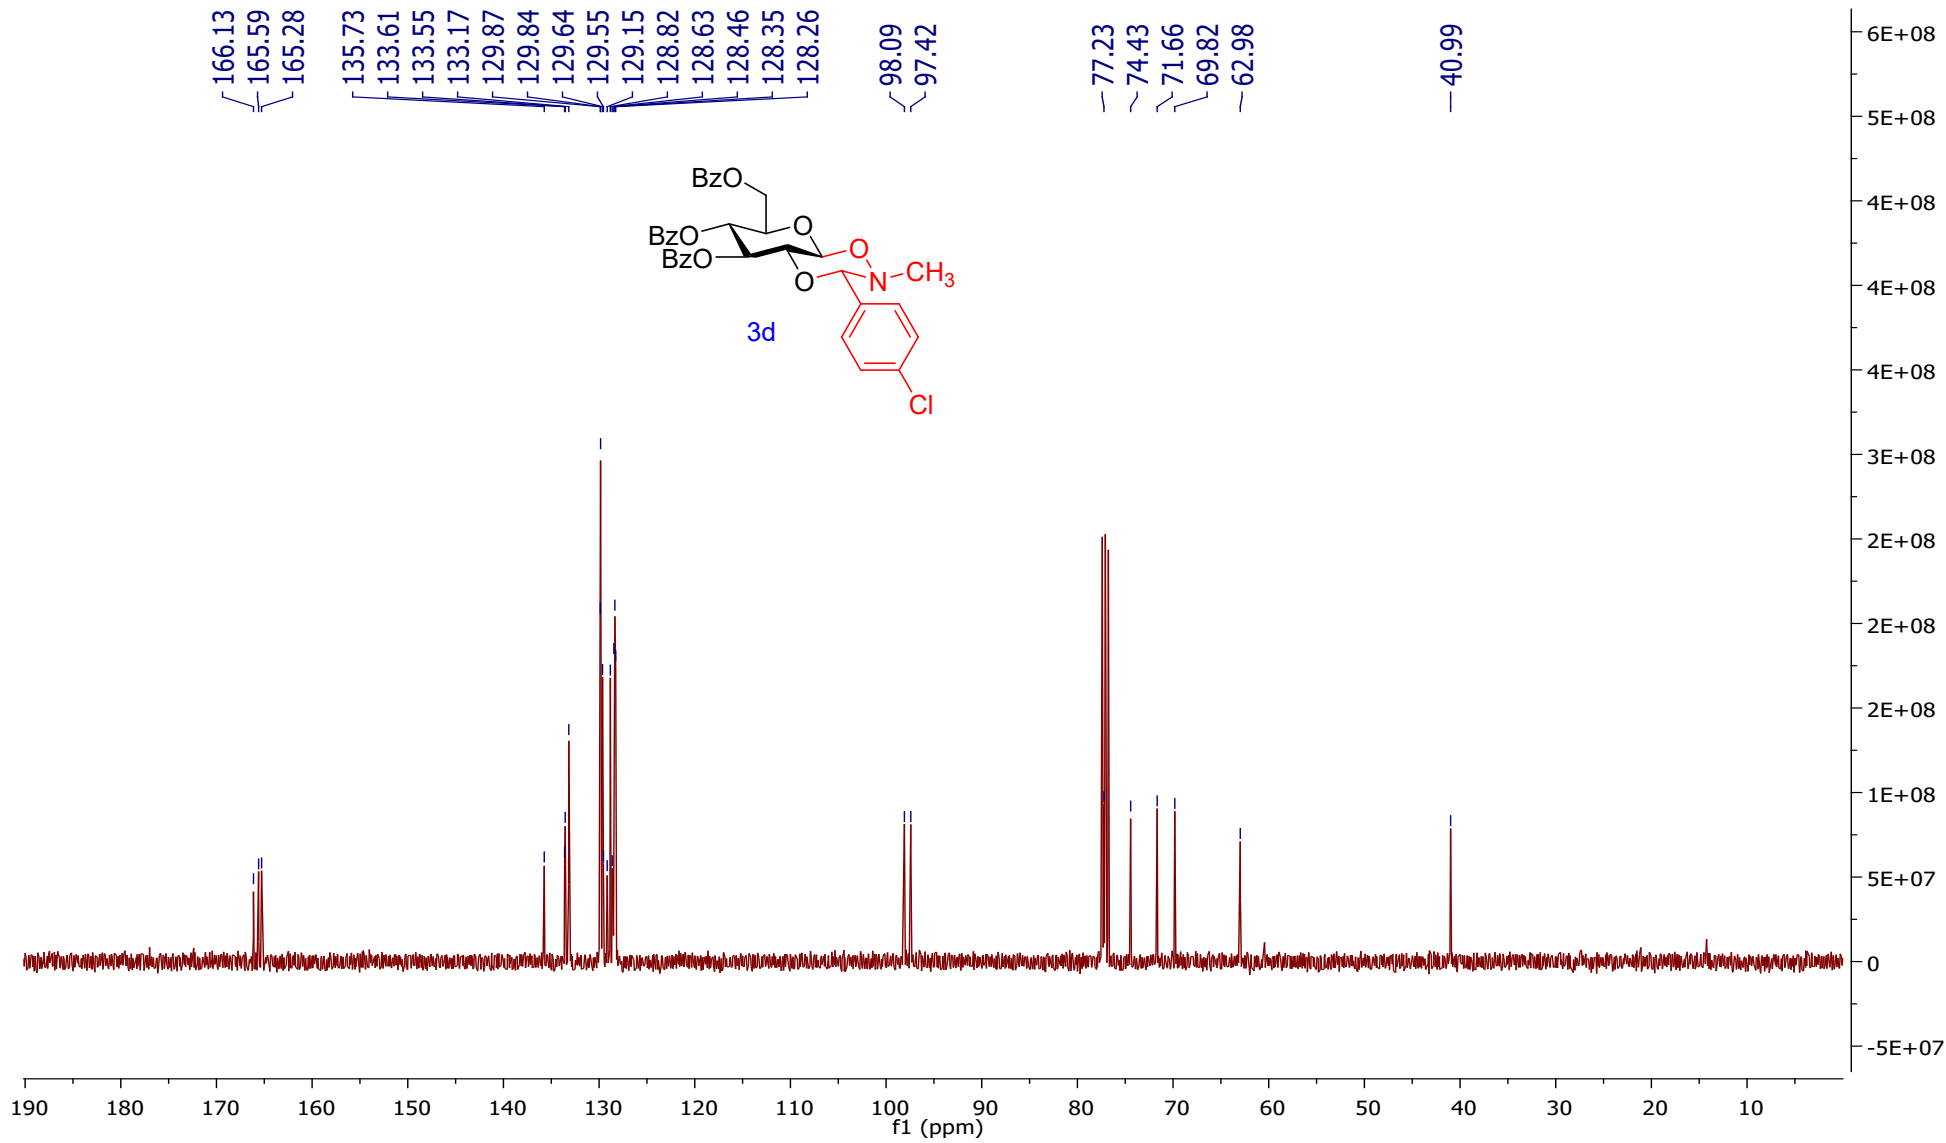

**$^1\text{H}$  NMR (400 MHz) and  $^{13}\text{C}$  NMR (101 MHz) of compound 4a**

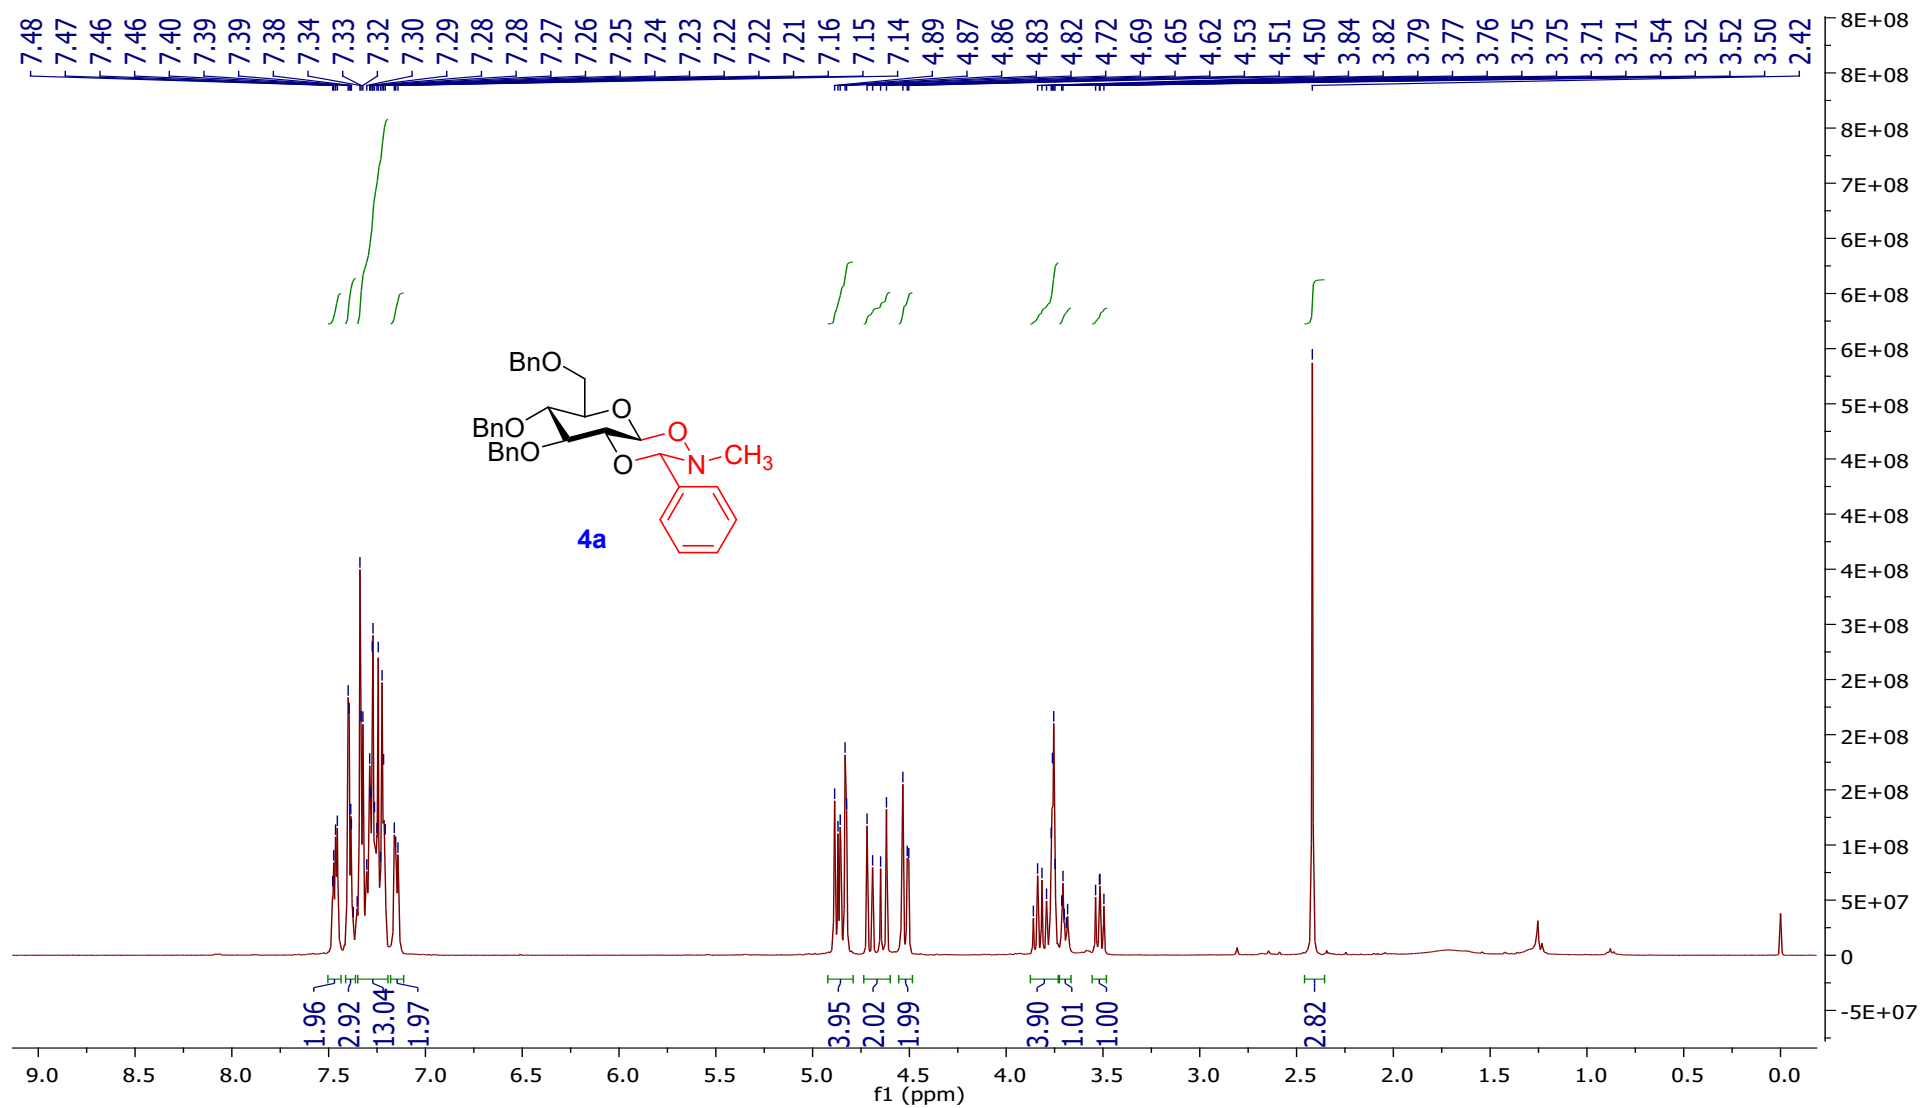

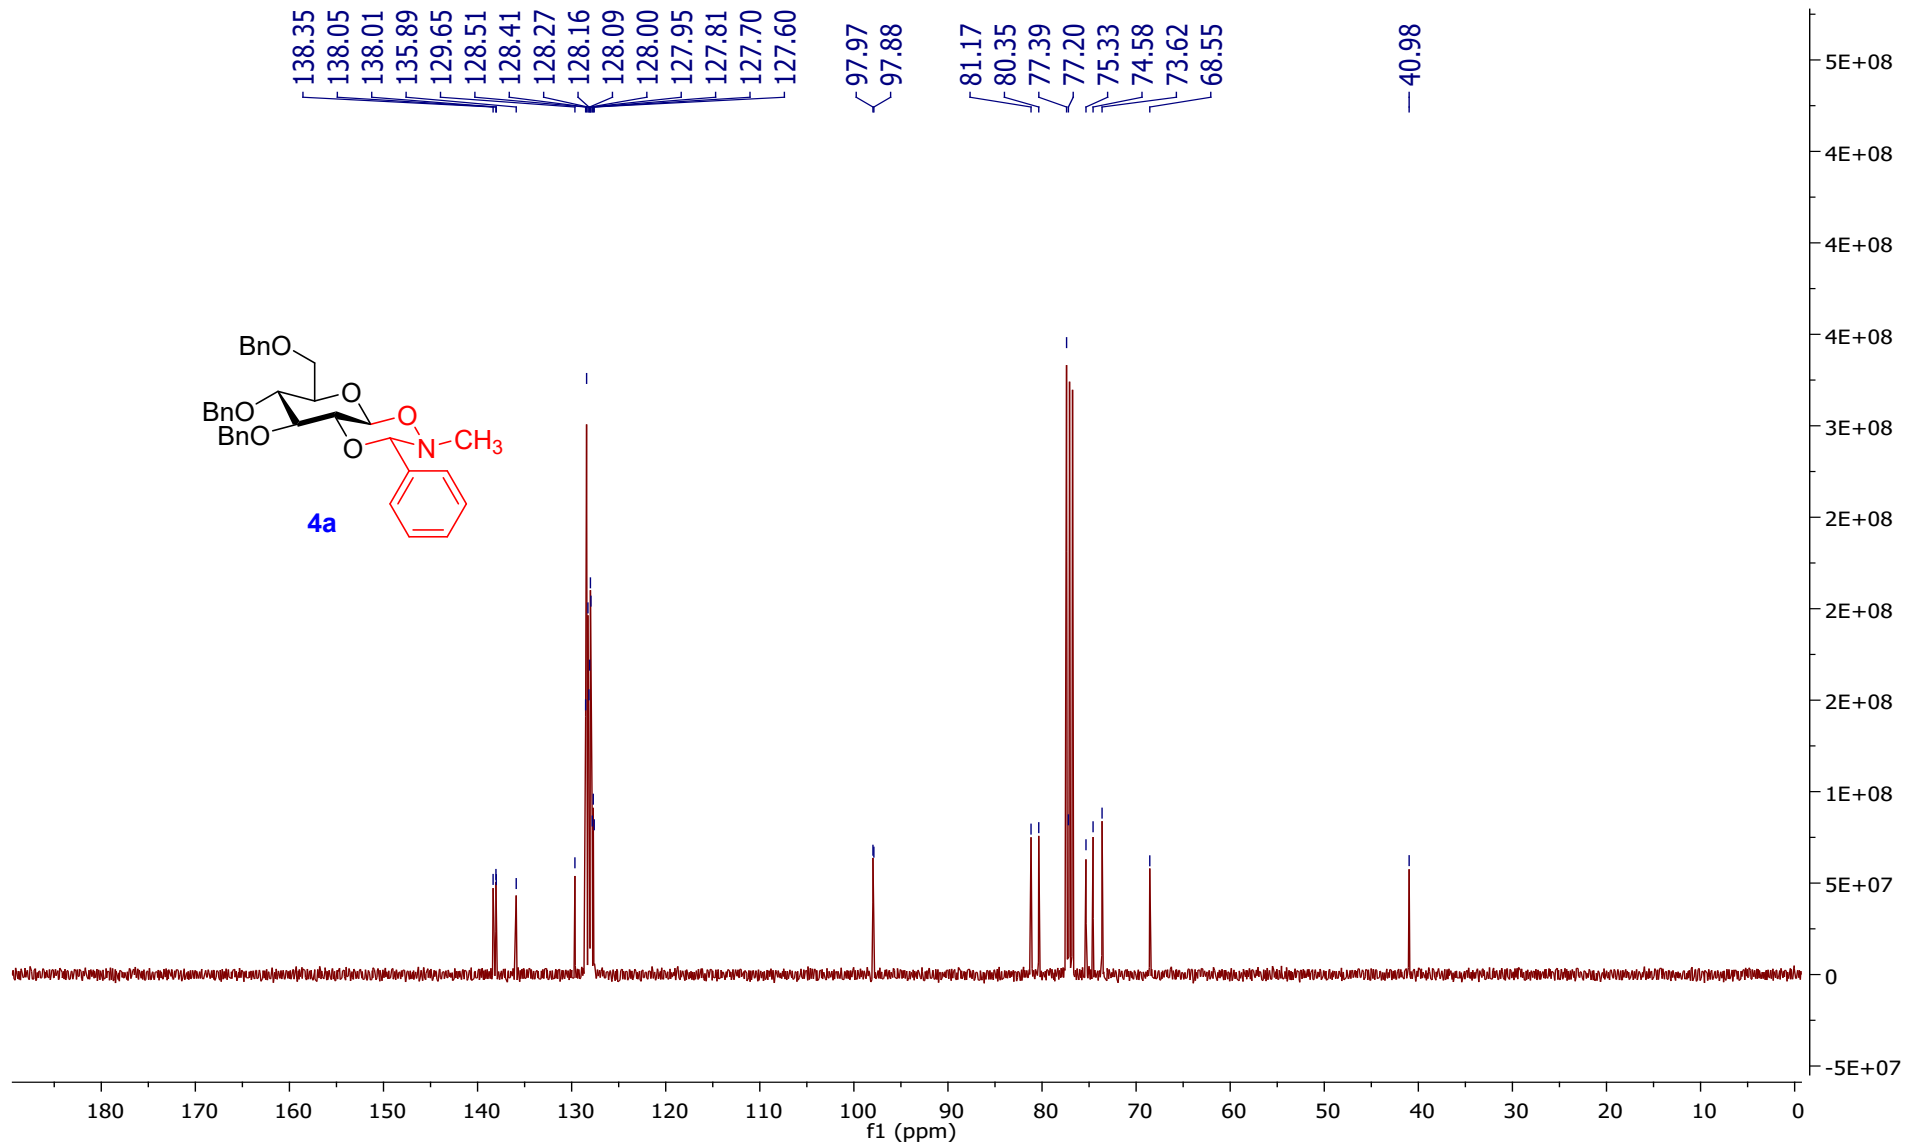

**<sup>1</sup>H NMR (400 MHz) and <sup>13</sup>C NMR (101 MHz) of compound 4b**

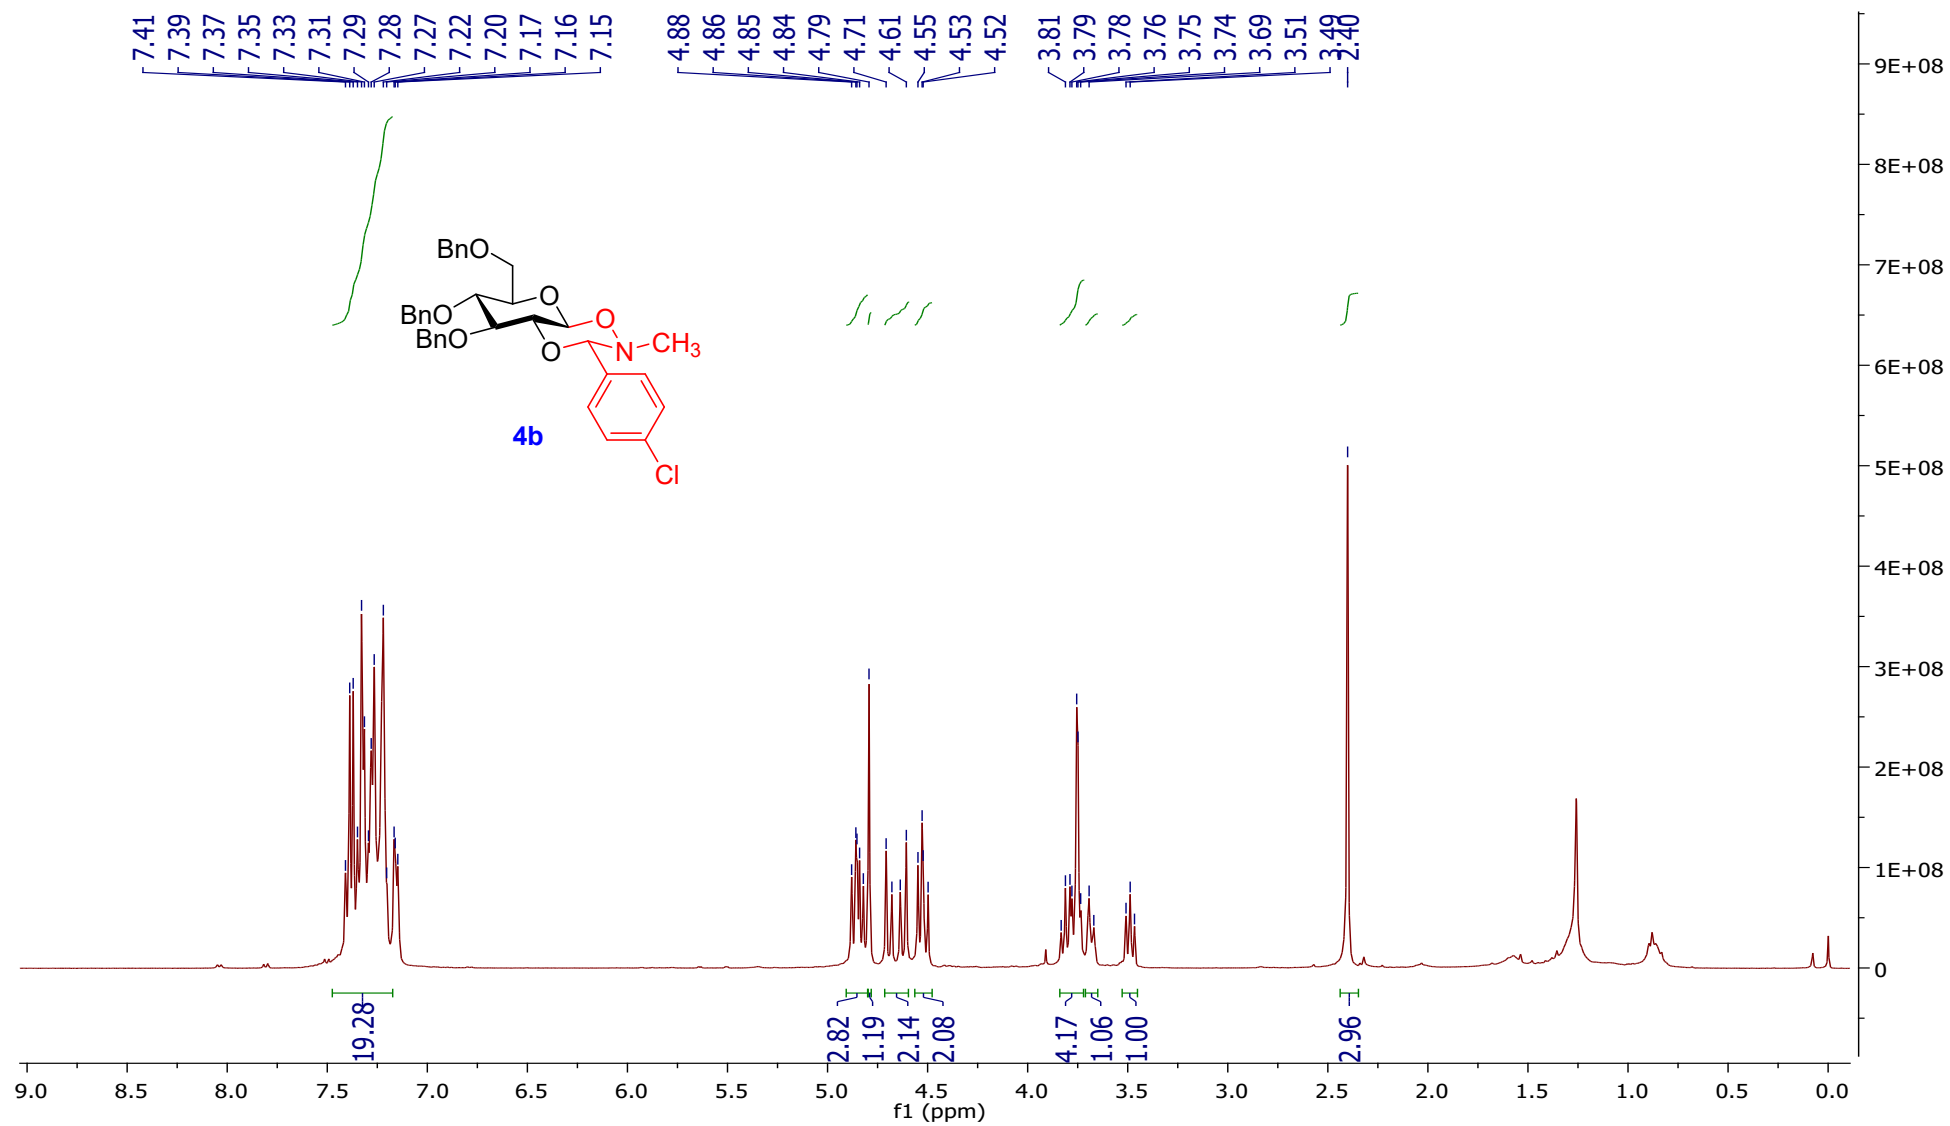

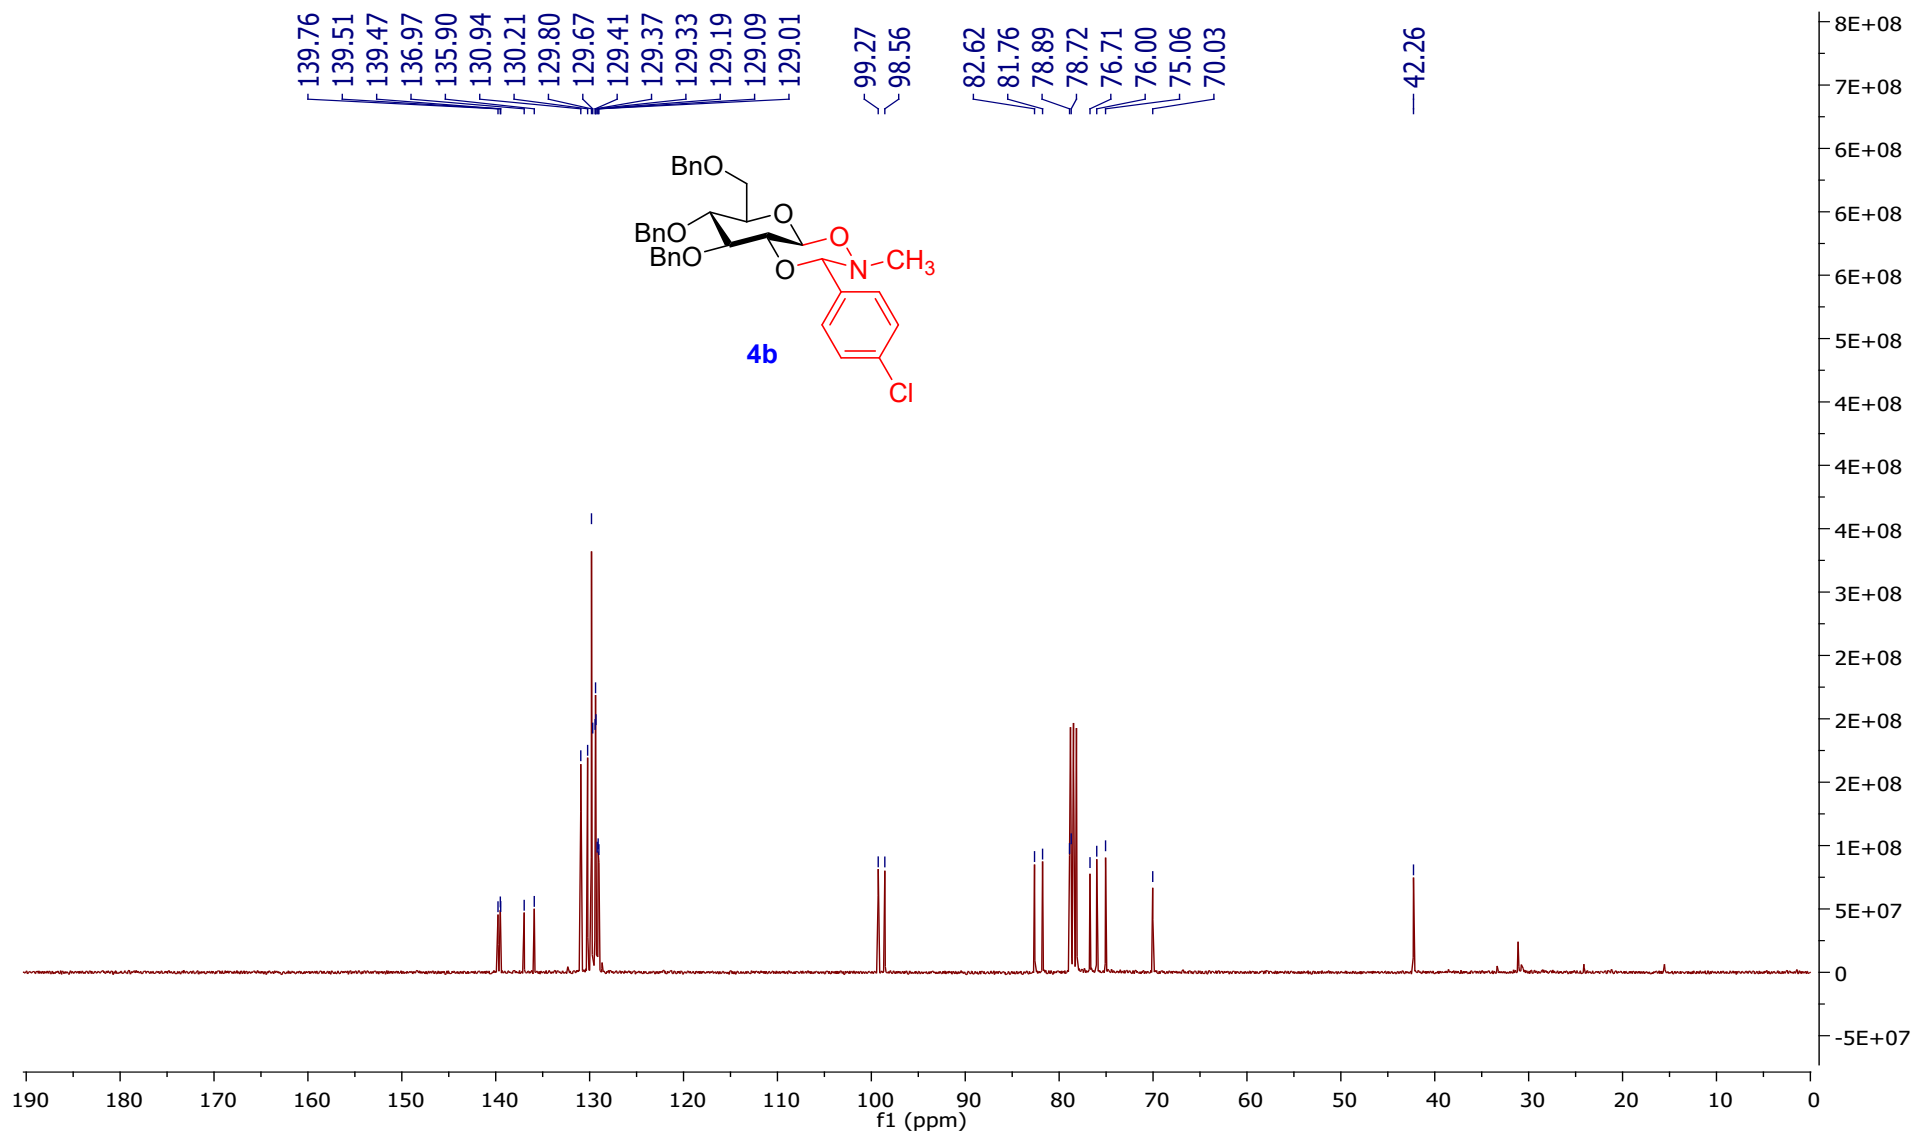

**<sup>1</sup>H NMR (400 MHz) and <sup>13</sup>C NMR (101 MHz) of compound 4c**

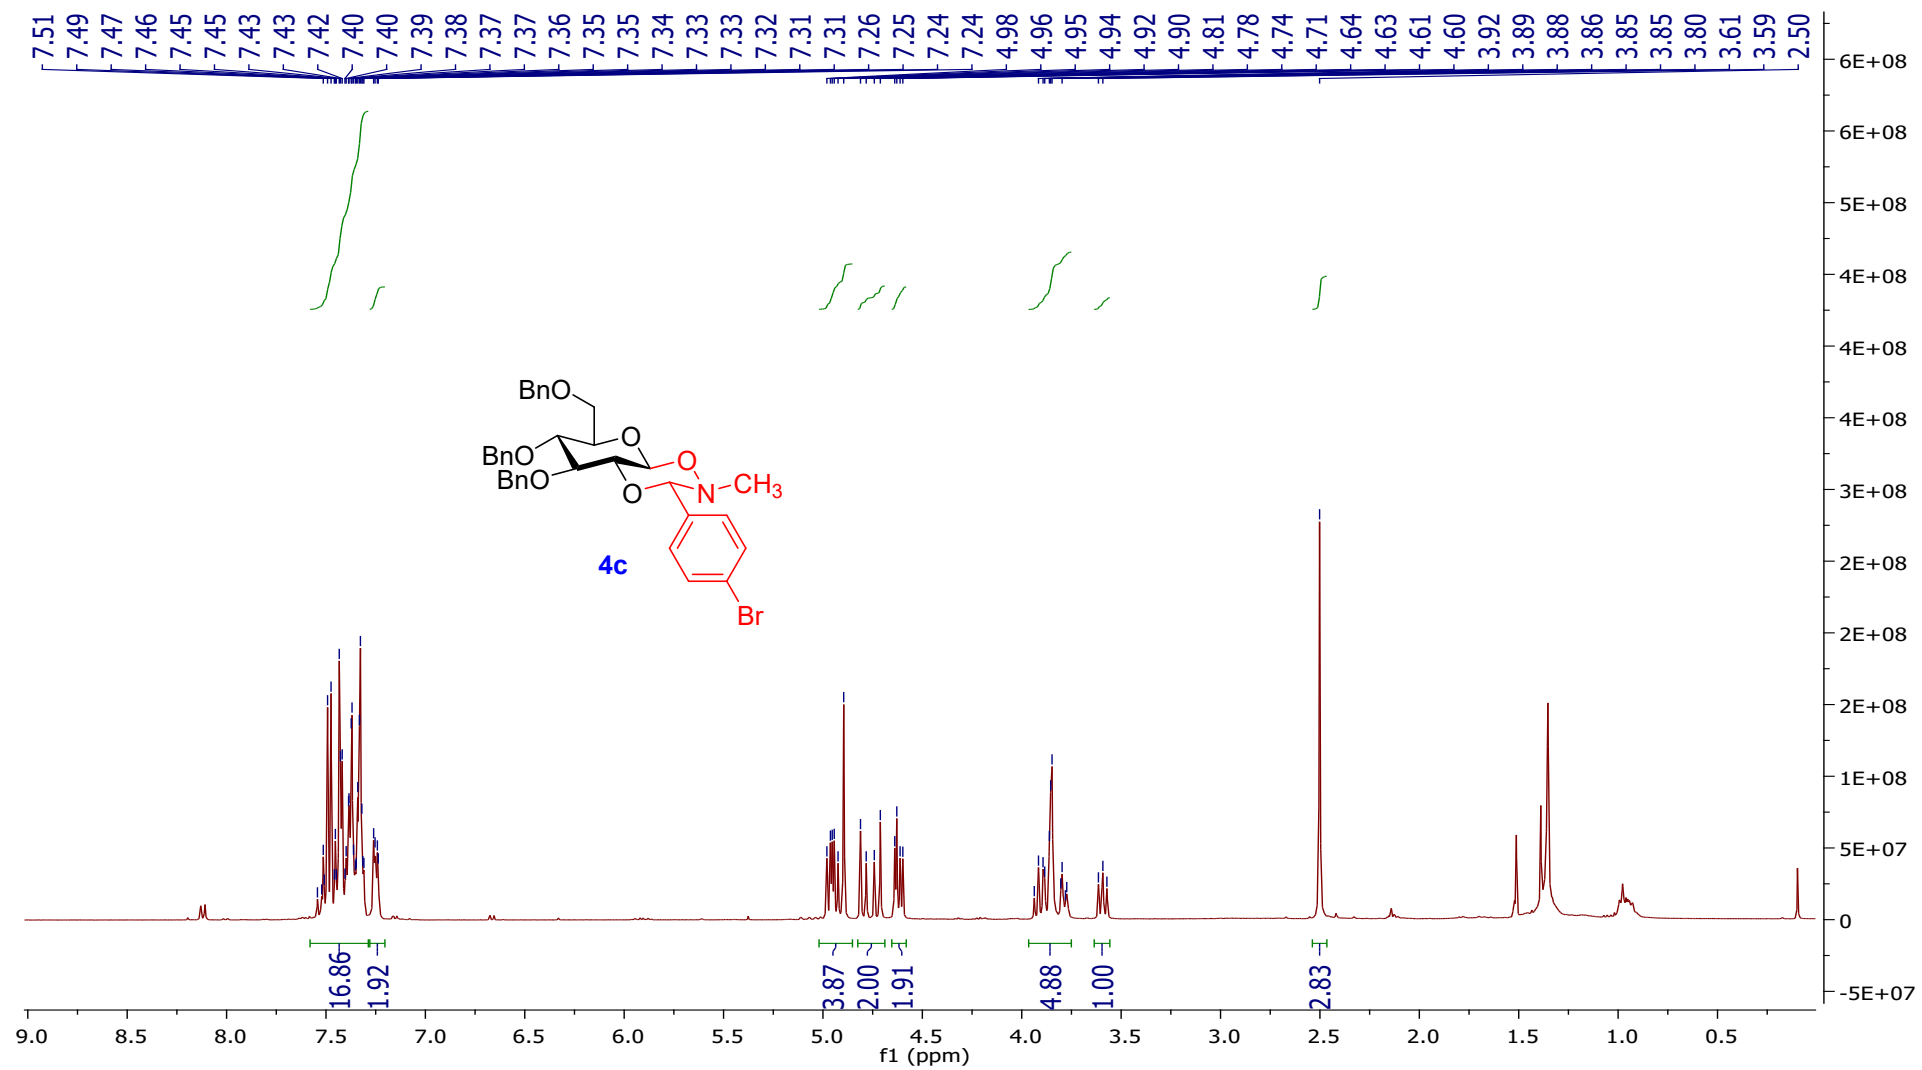

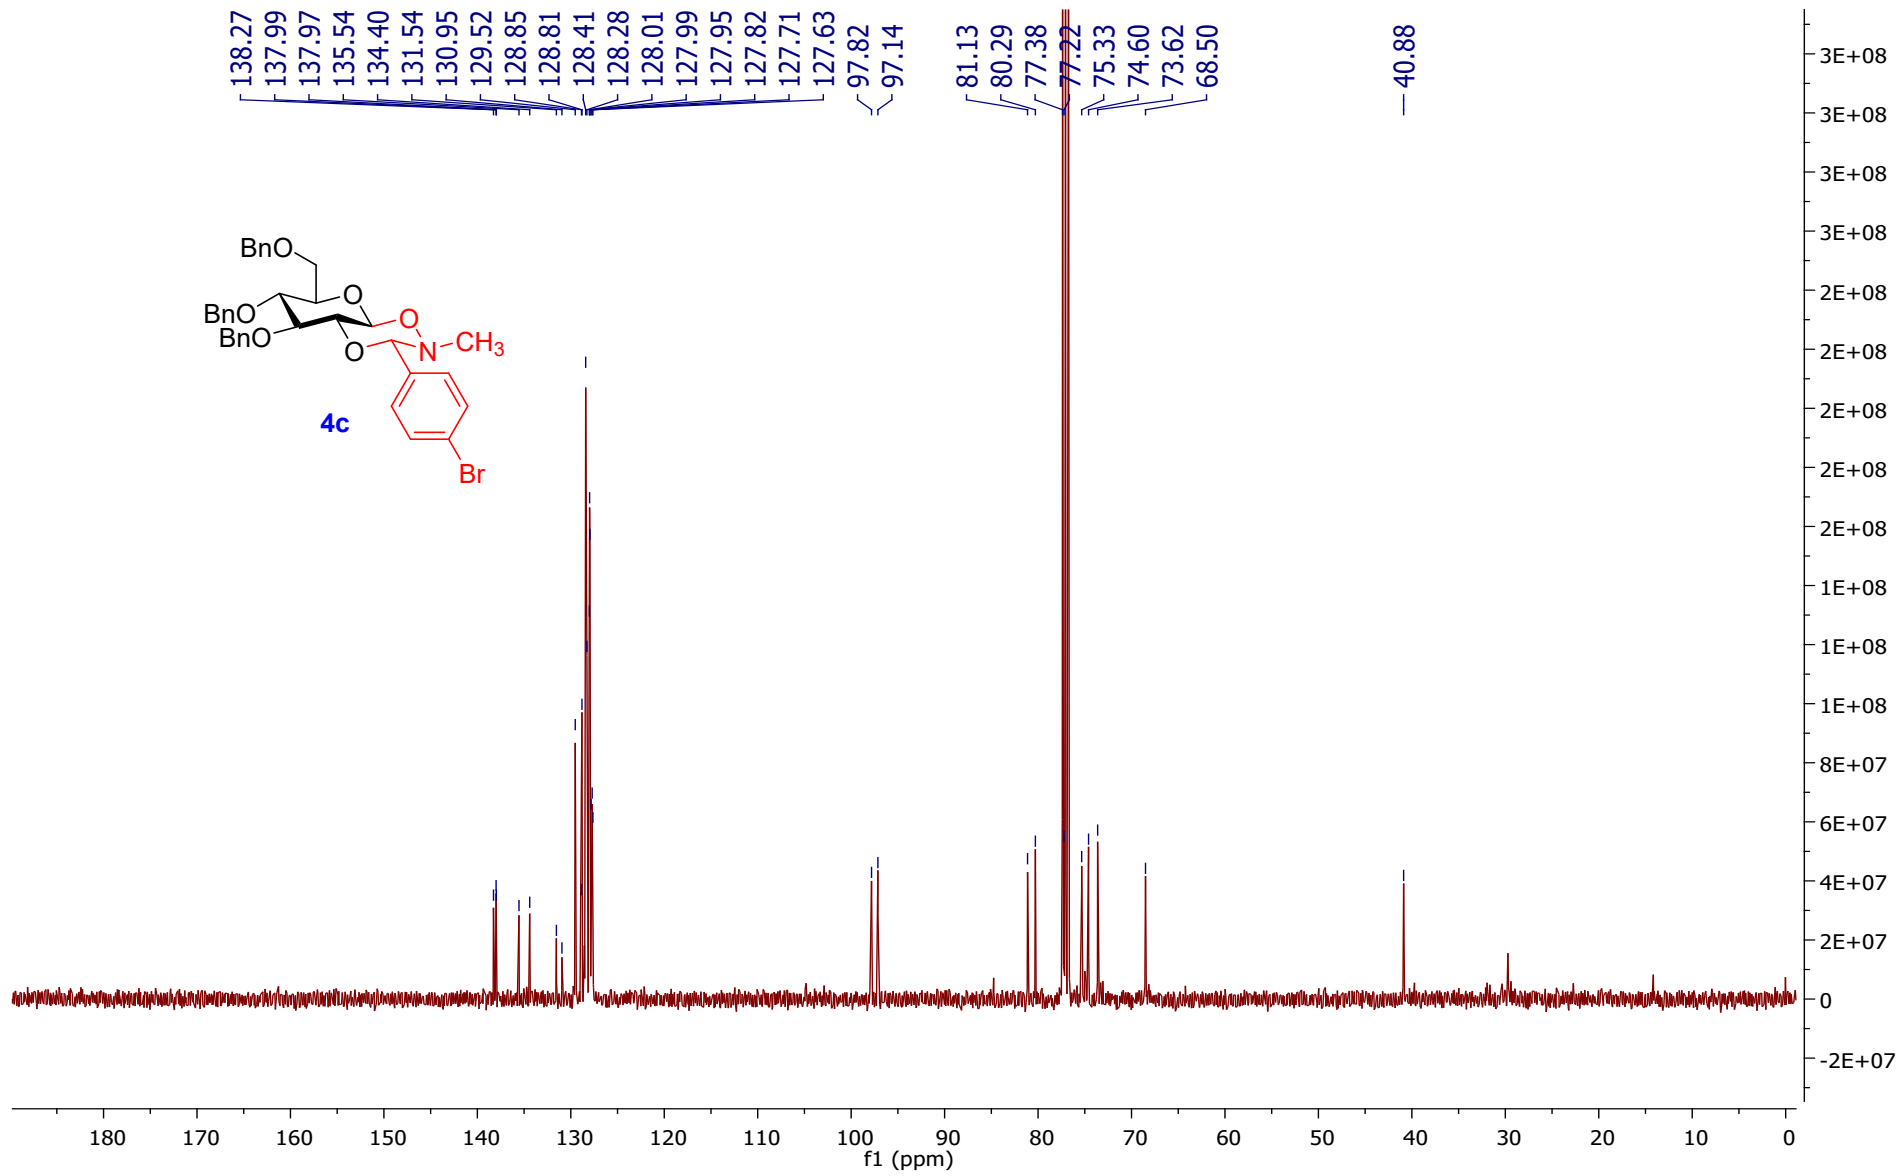

**<sup>1</sup>H NMR (400 MHz) and <sup>13</sup>C NMR (101 MHz) of compound 4d**

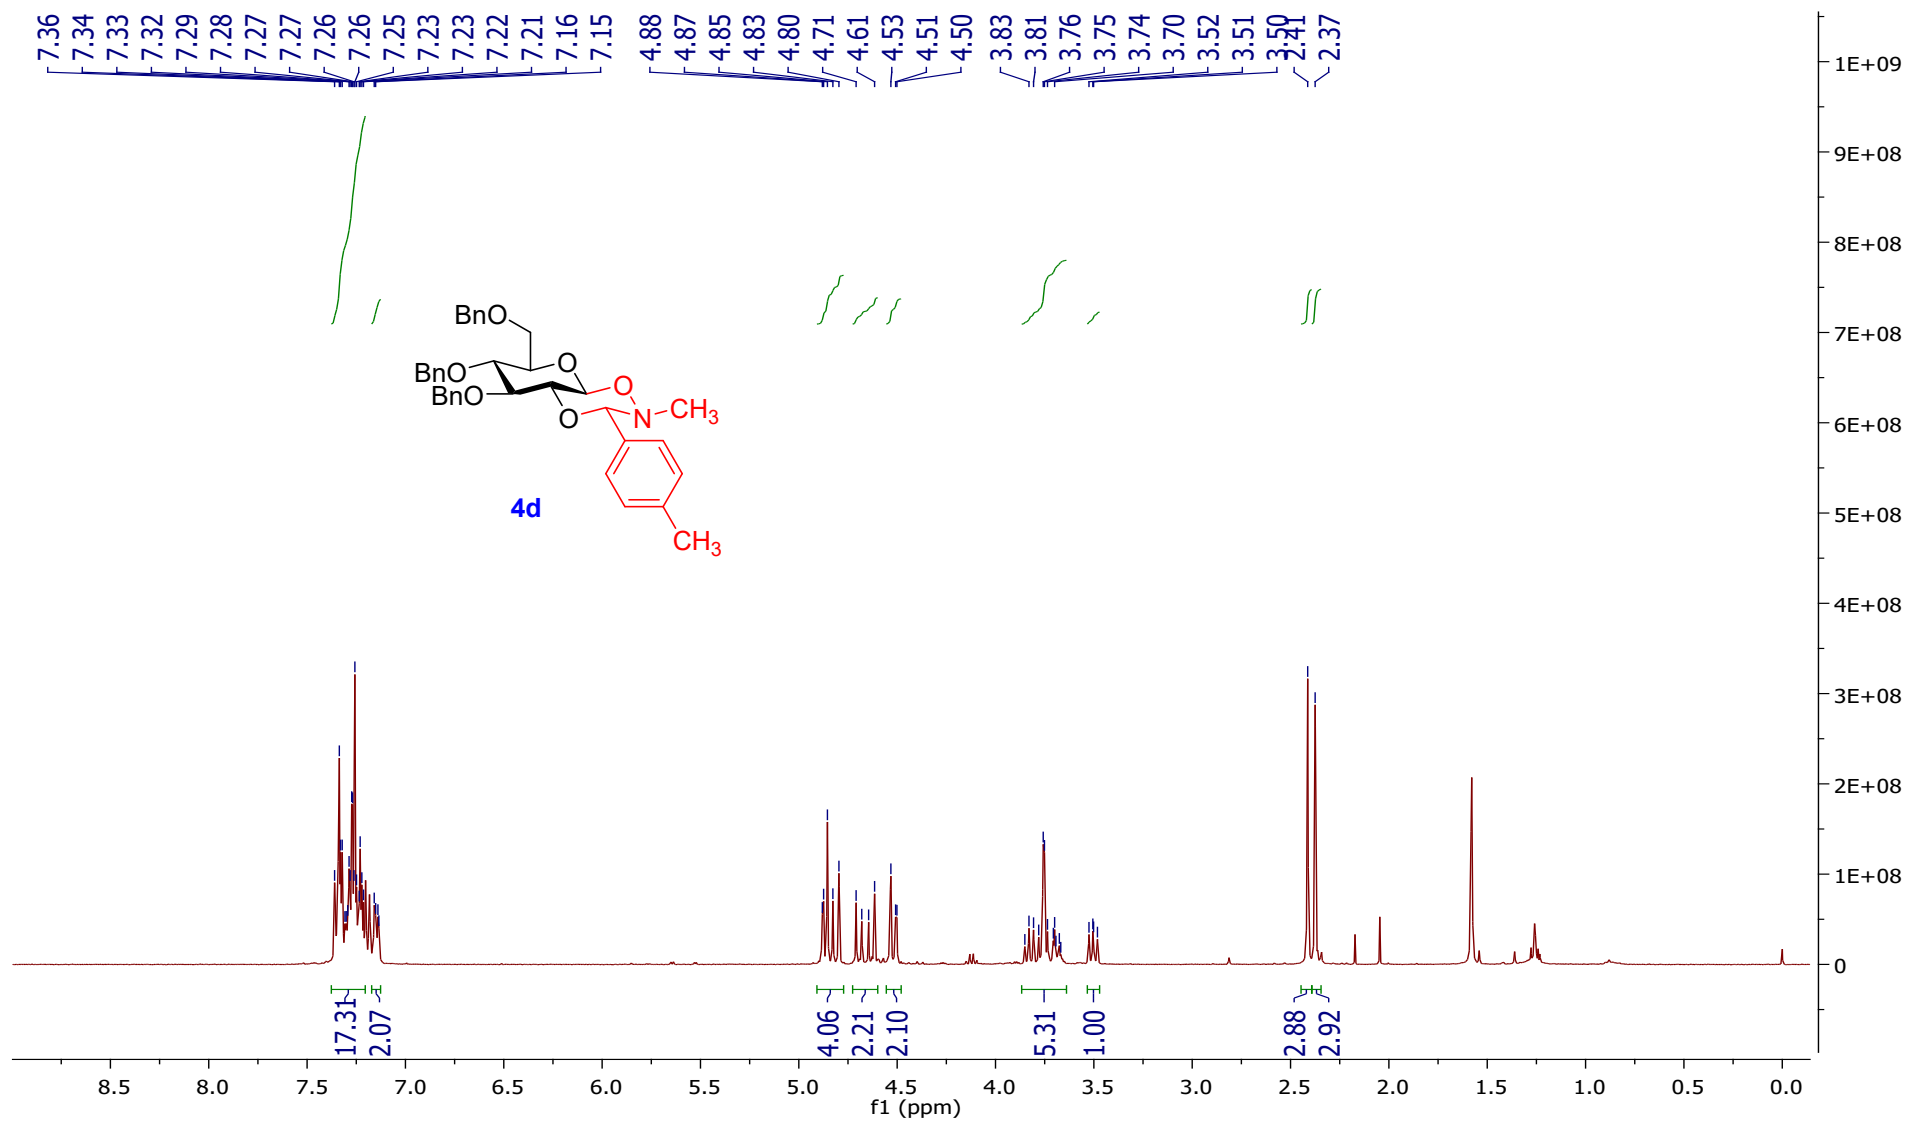



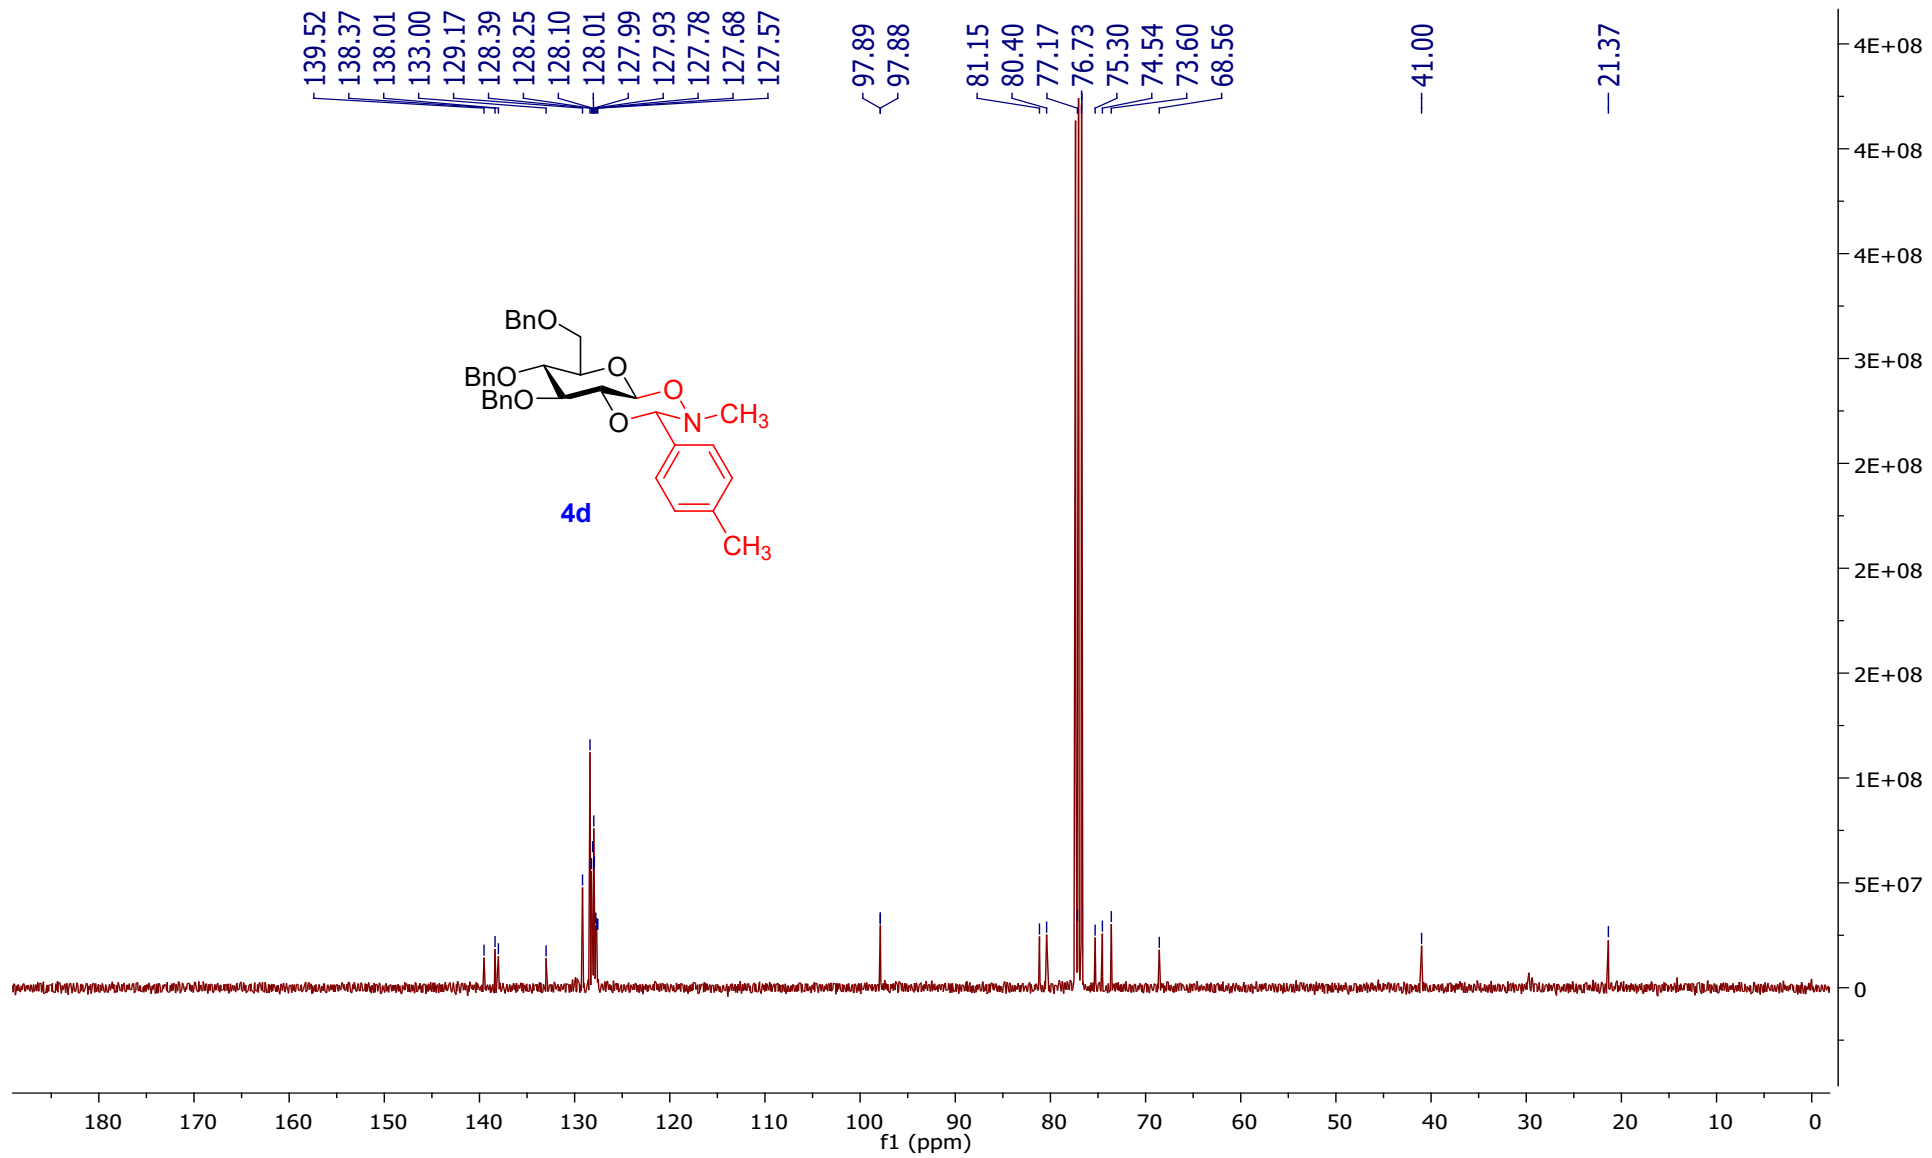

**<sup>1</sup>H NMR (400 MHz) and <sup>13</sup>C NMR (101 MHz) of compound 4e**

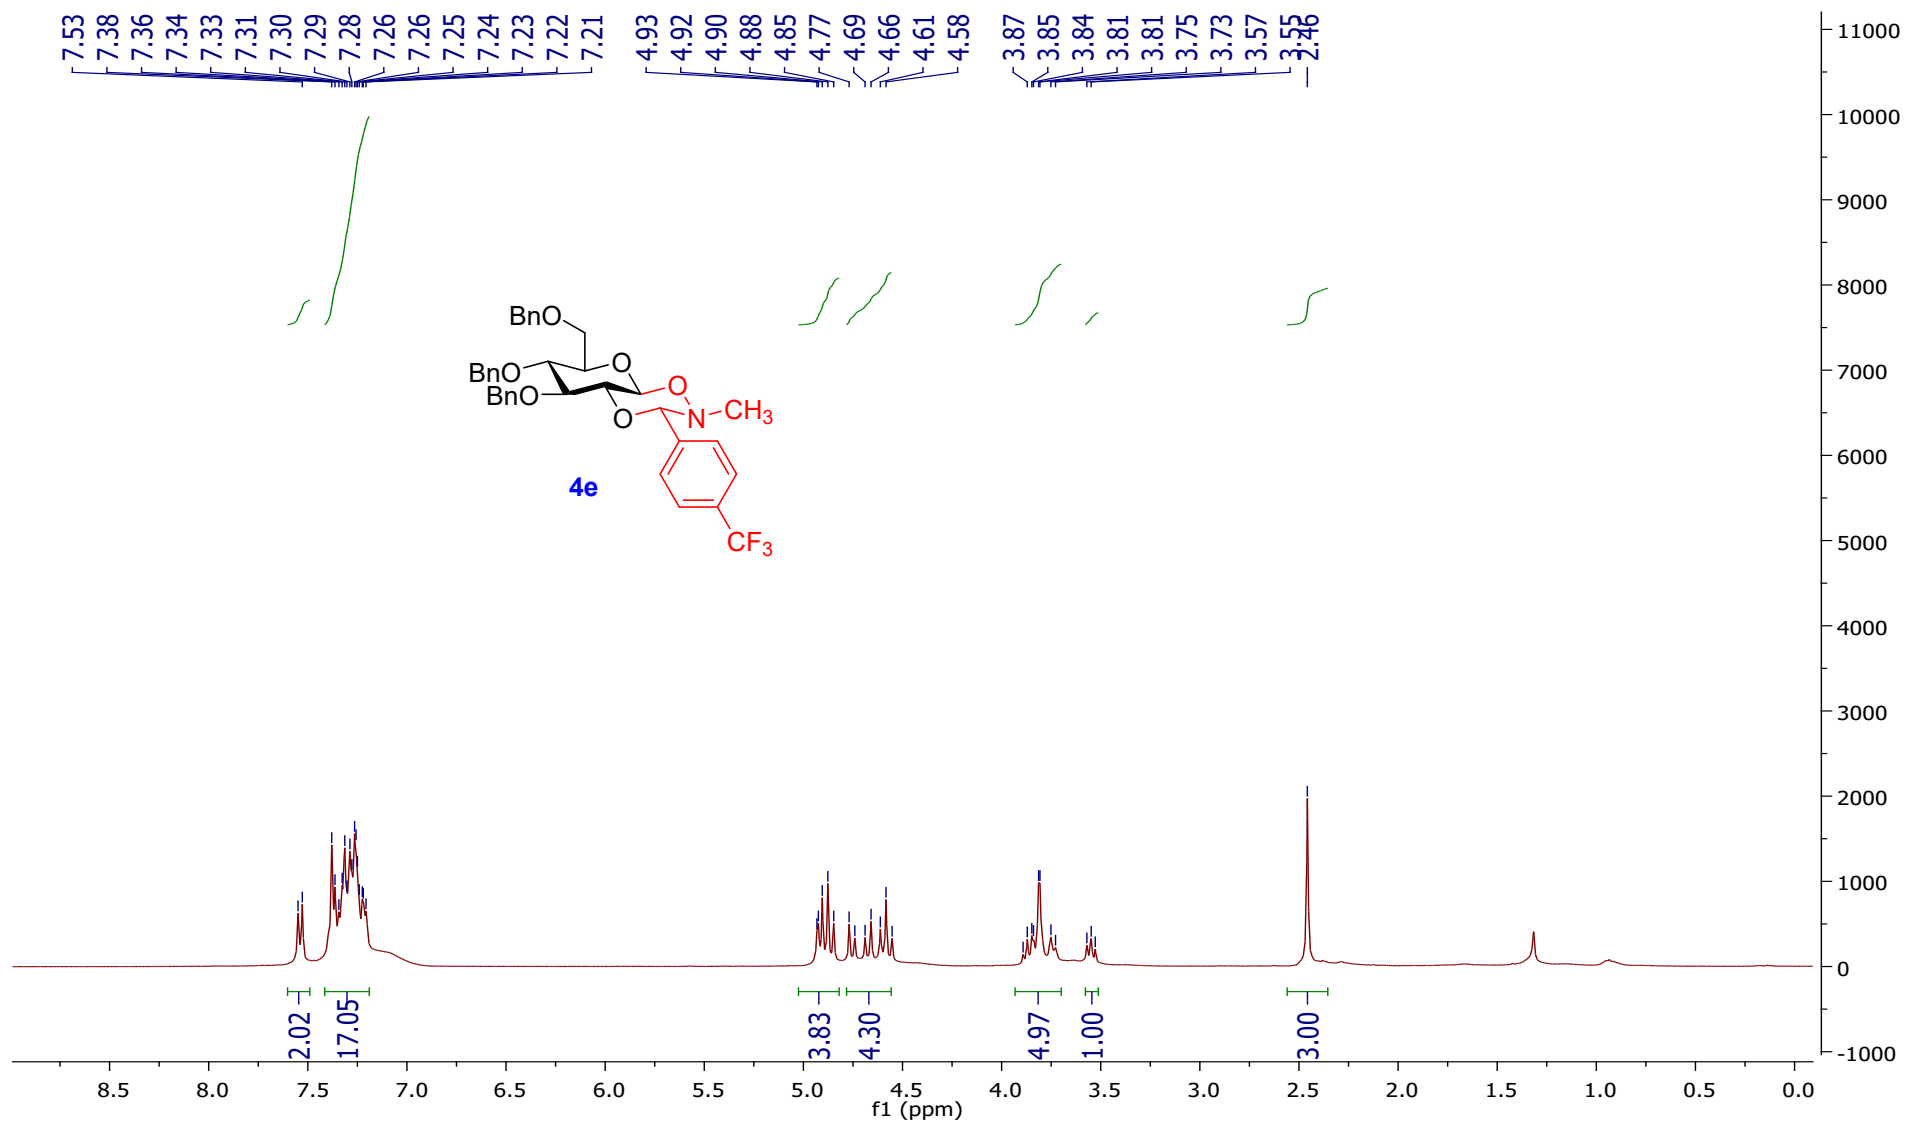

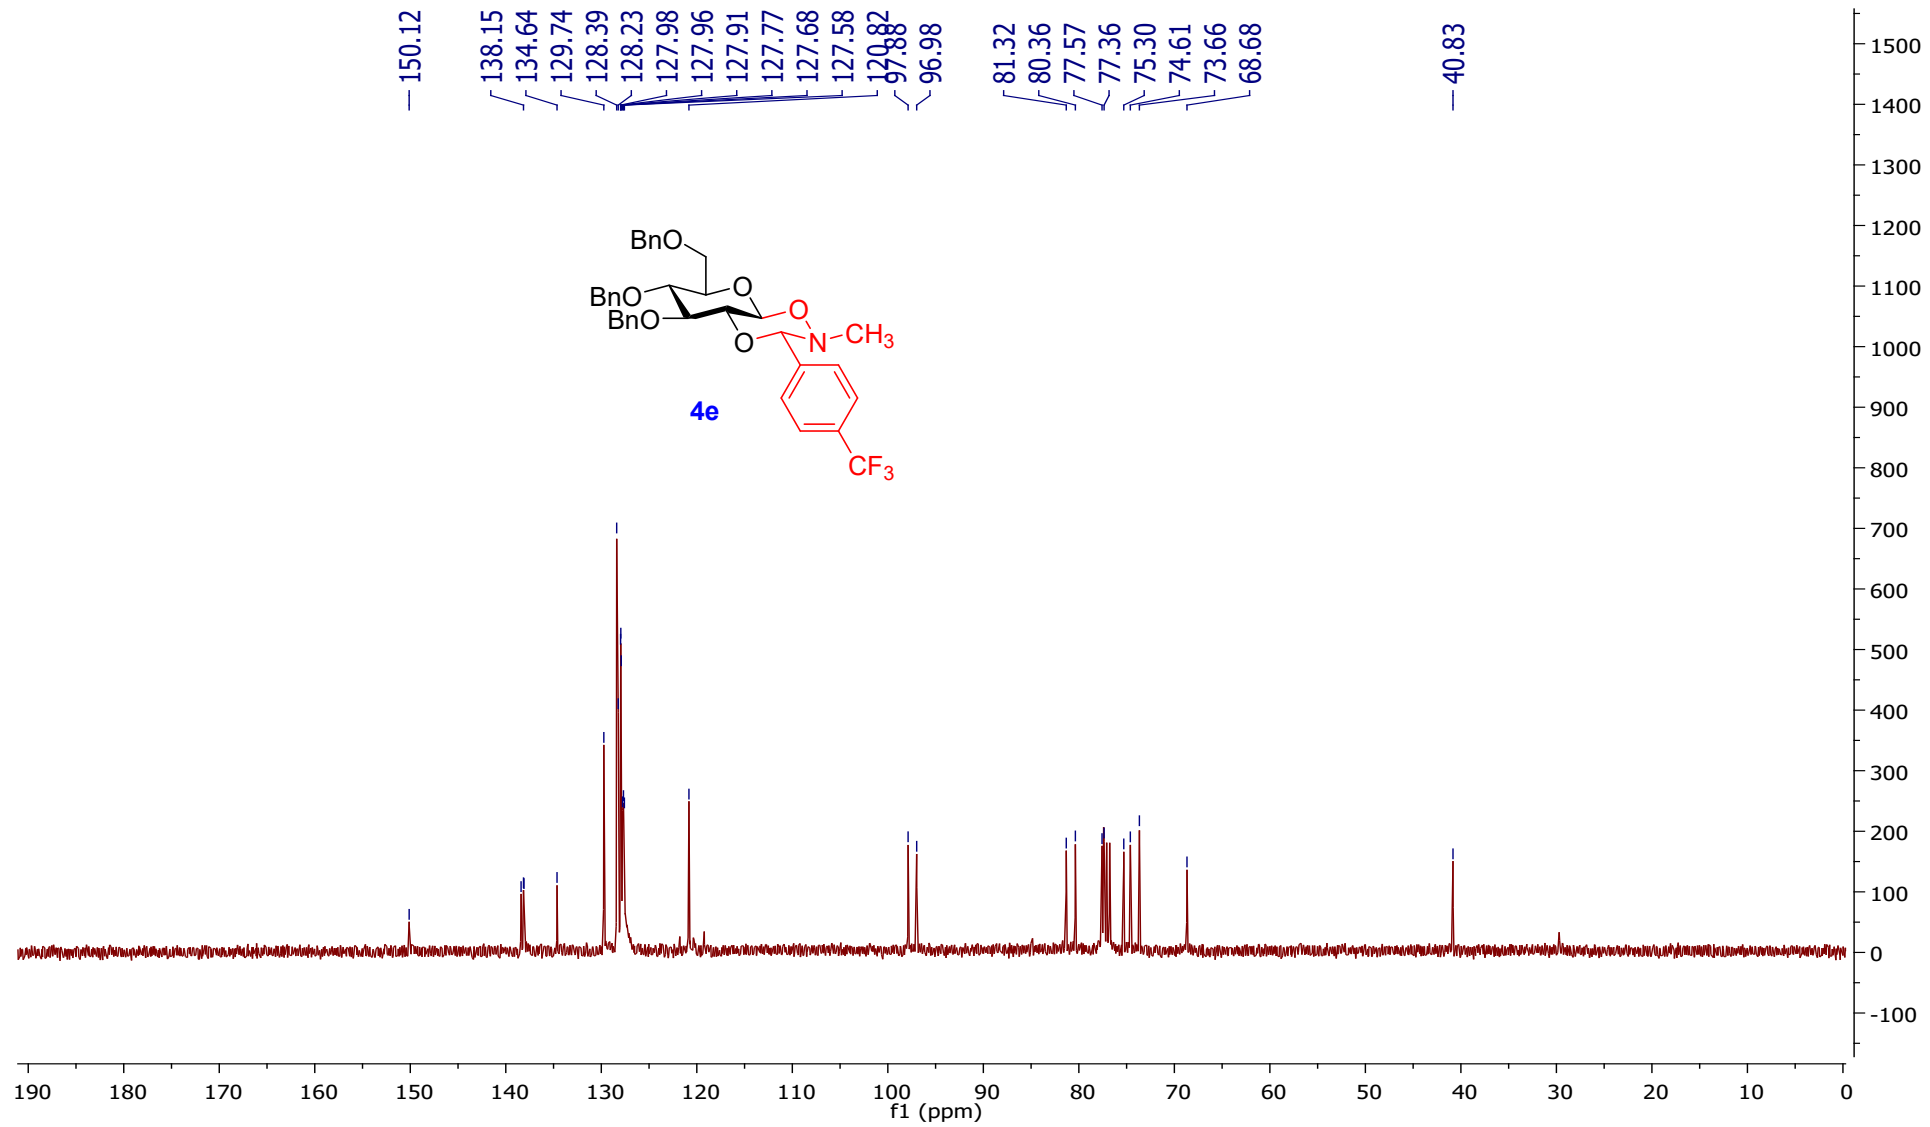

**<sup>1</sup>H NMR (400 MHz) and <sup>13</sup>C NMR (101 MHz) of compound 4f**

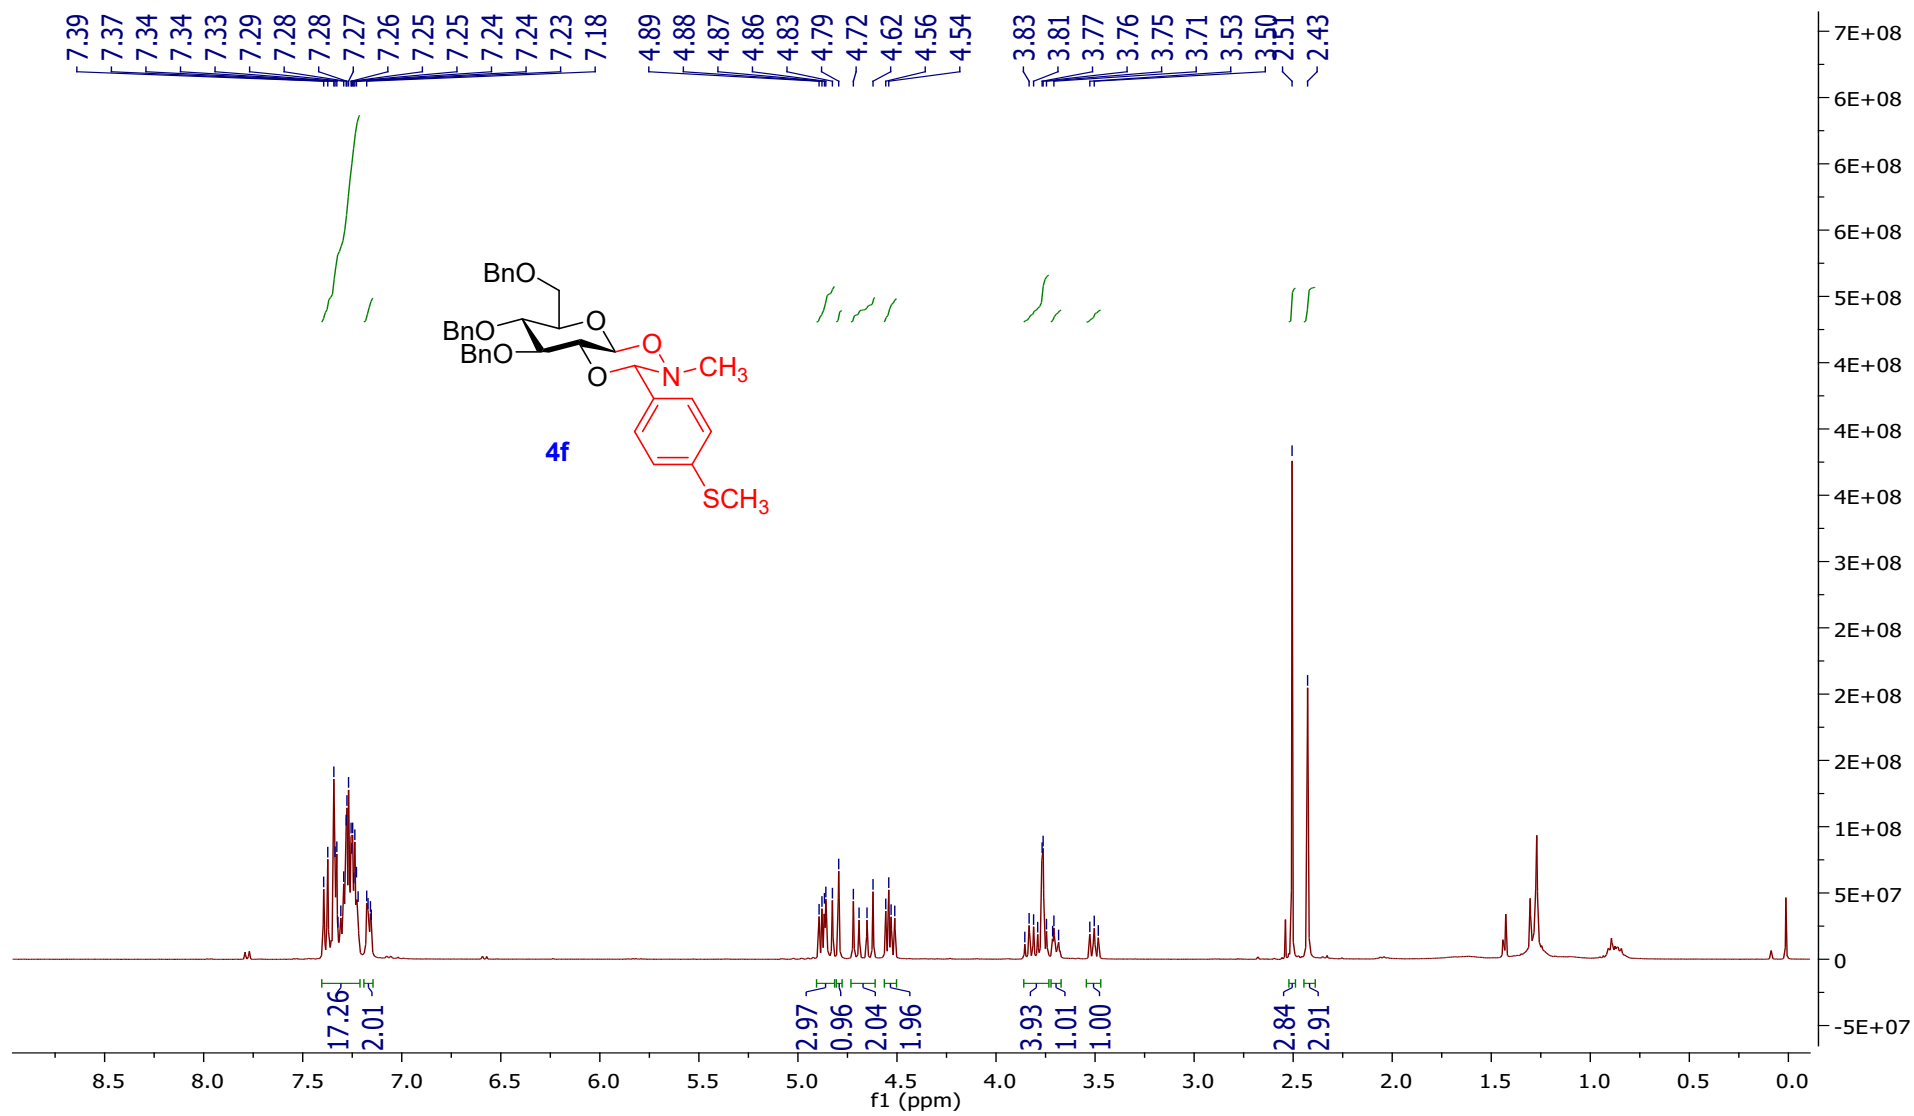

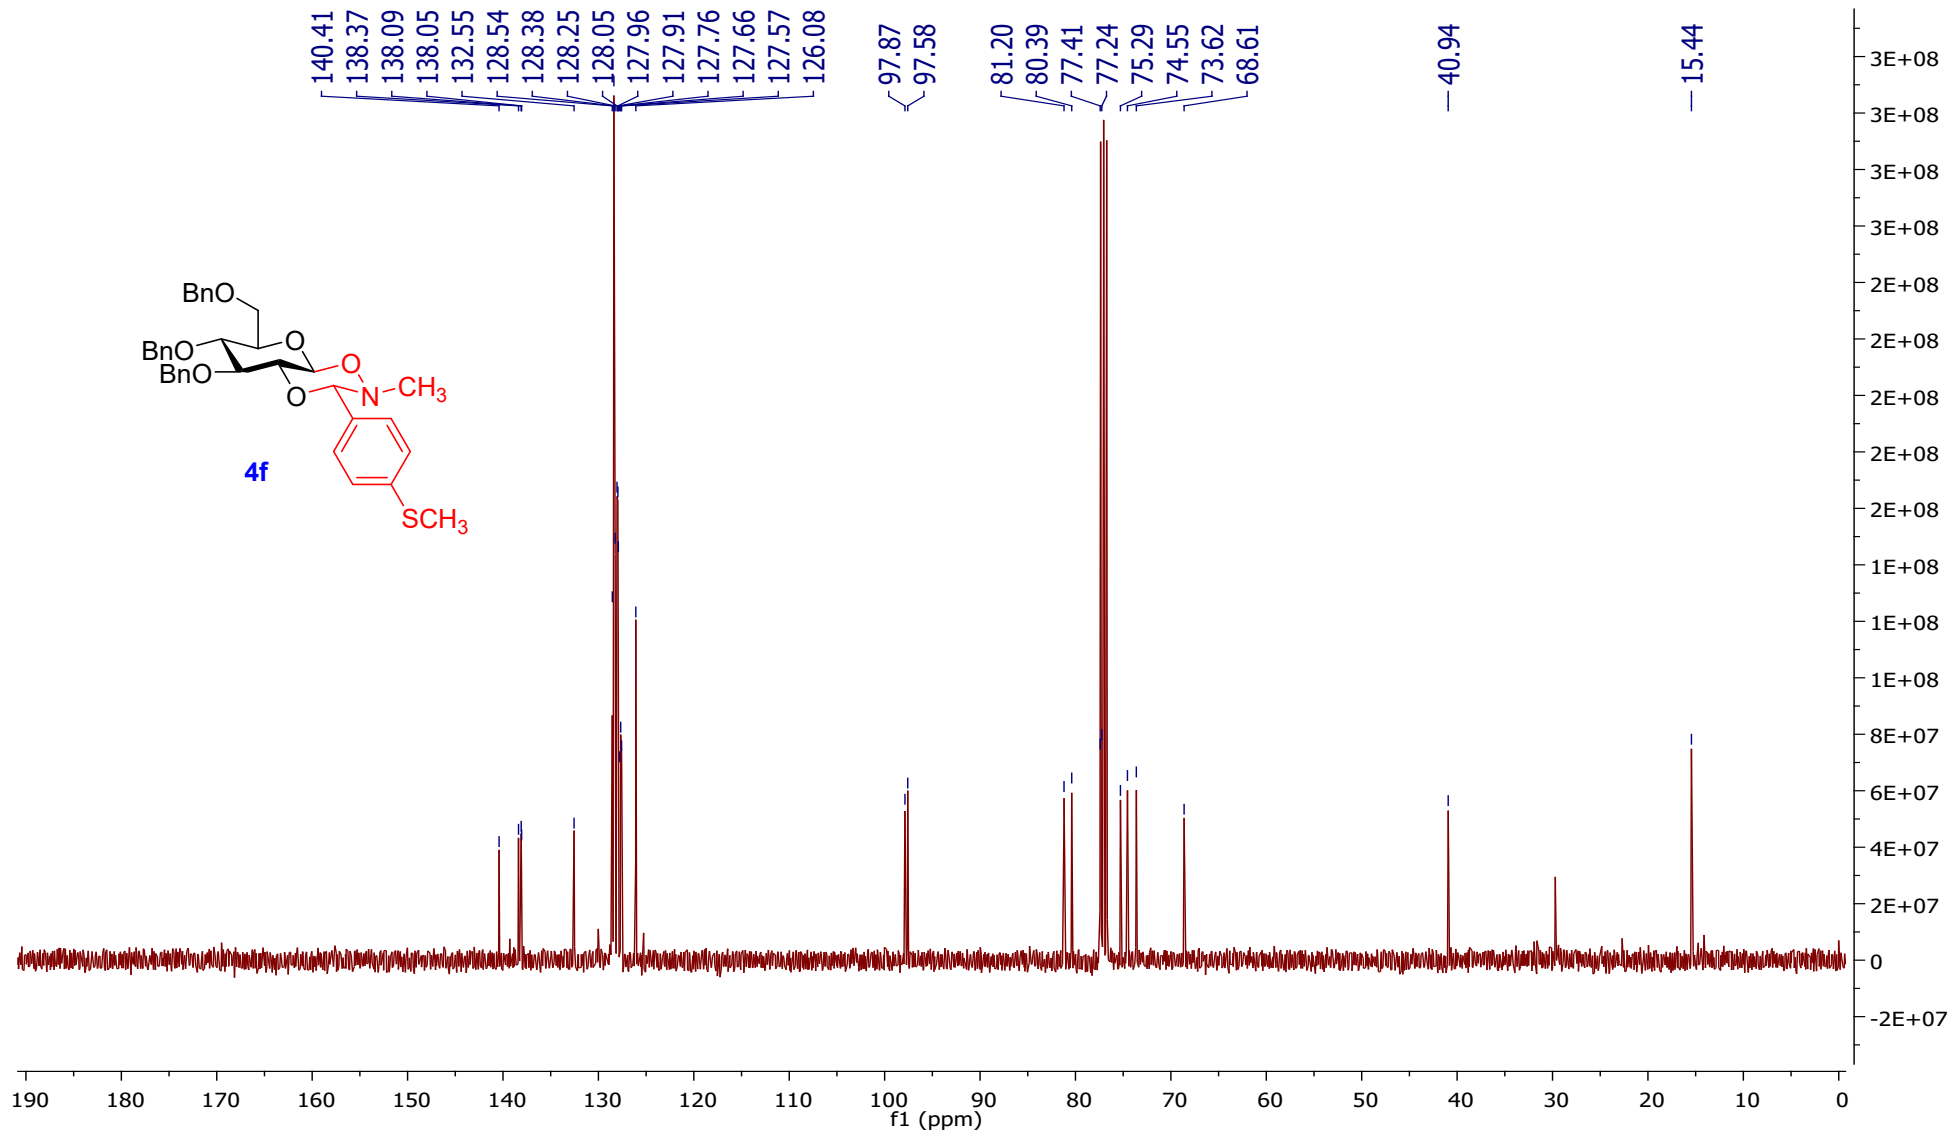

**<sup>1</sup>H NMR (400 MHz) and <sup>13</sup>C NMR (126 MHz) of compound 4g**

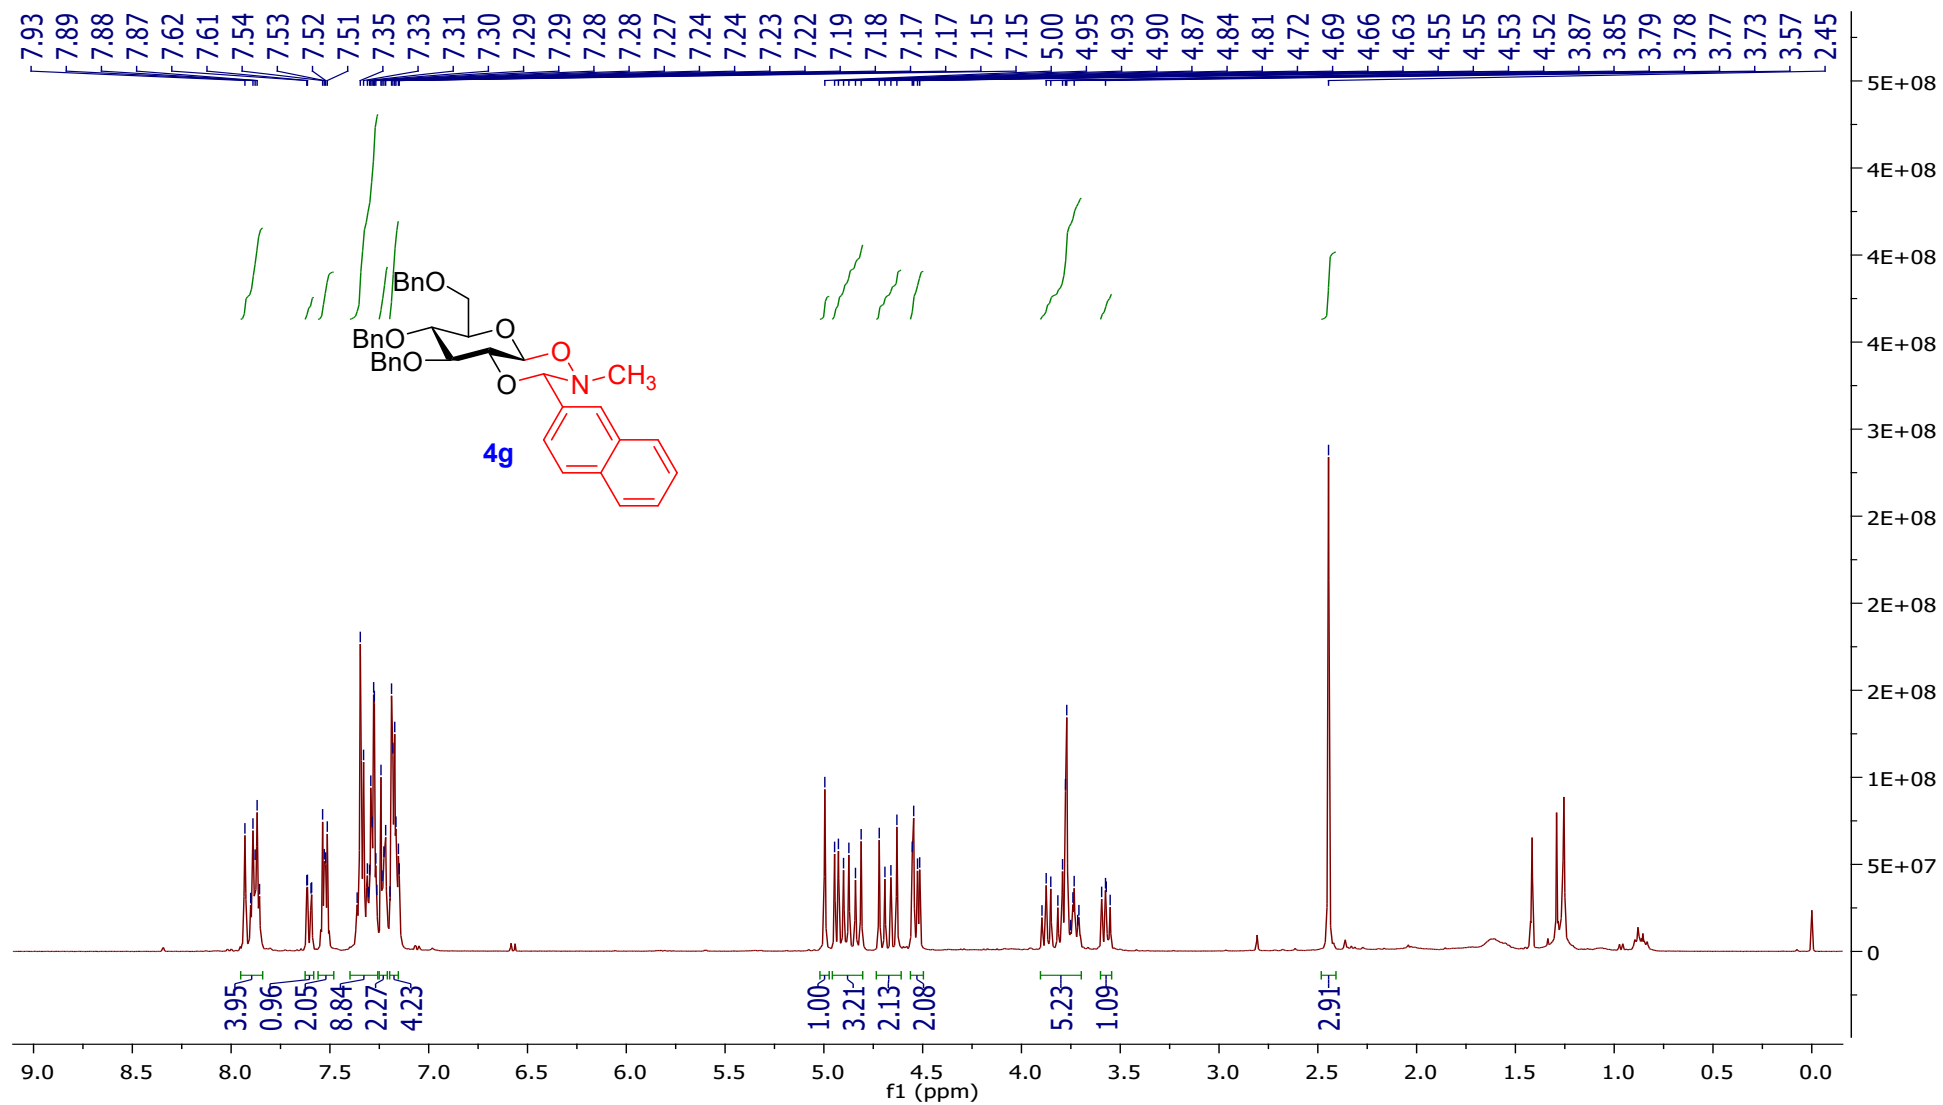

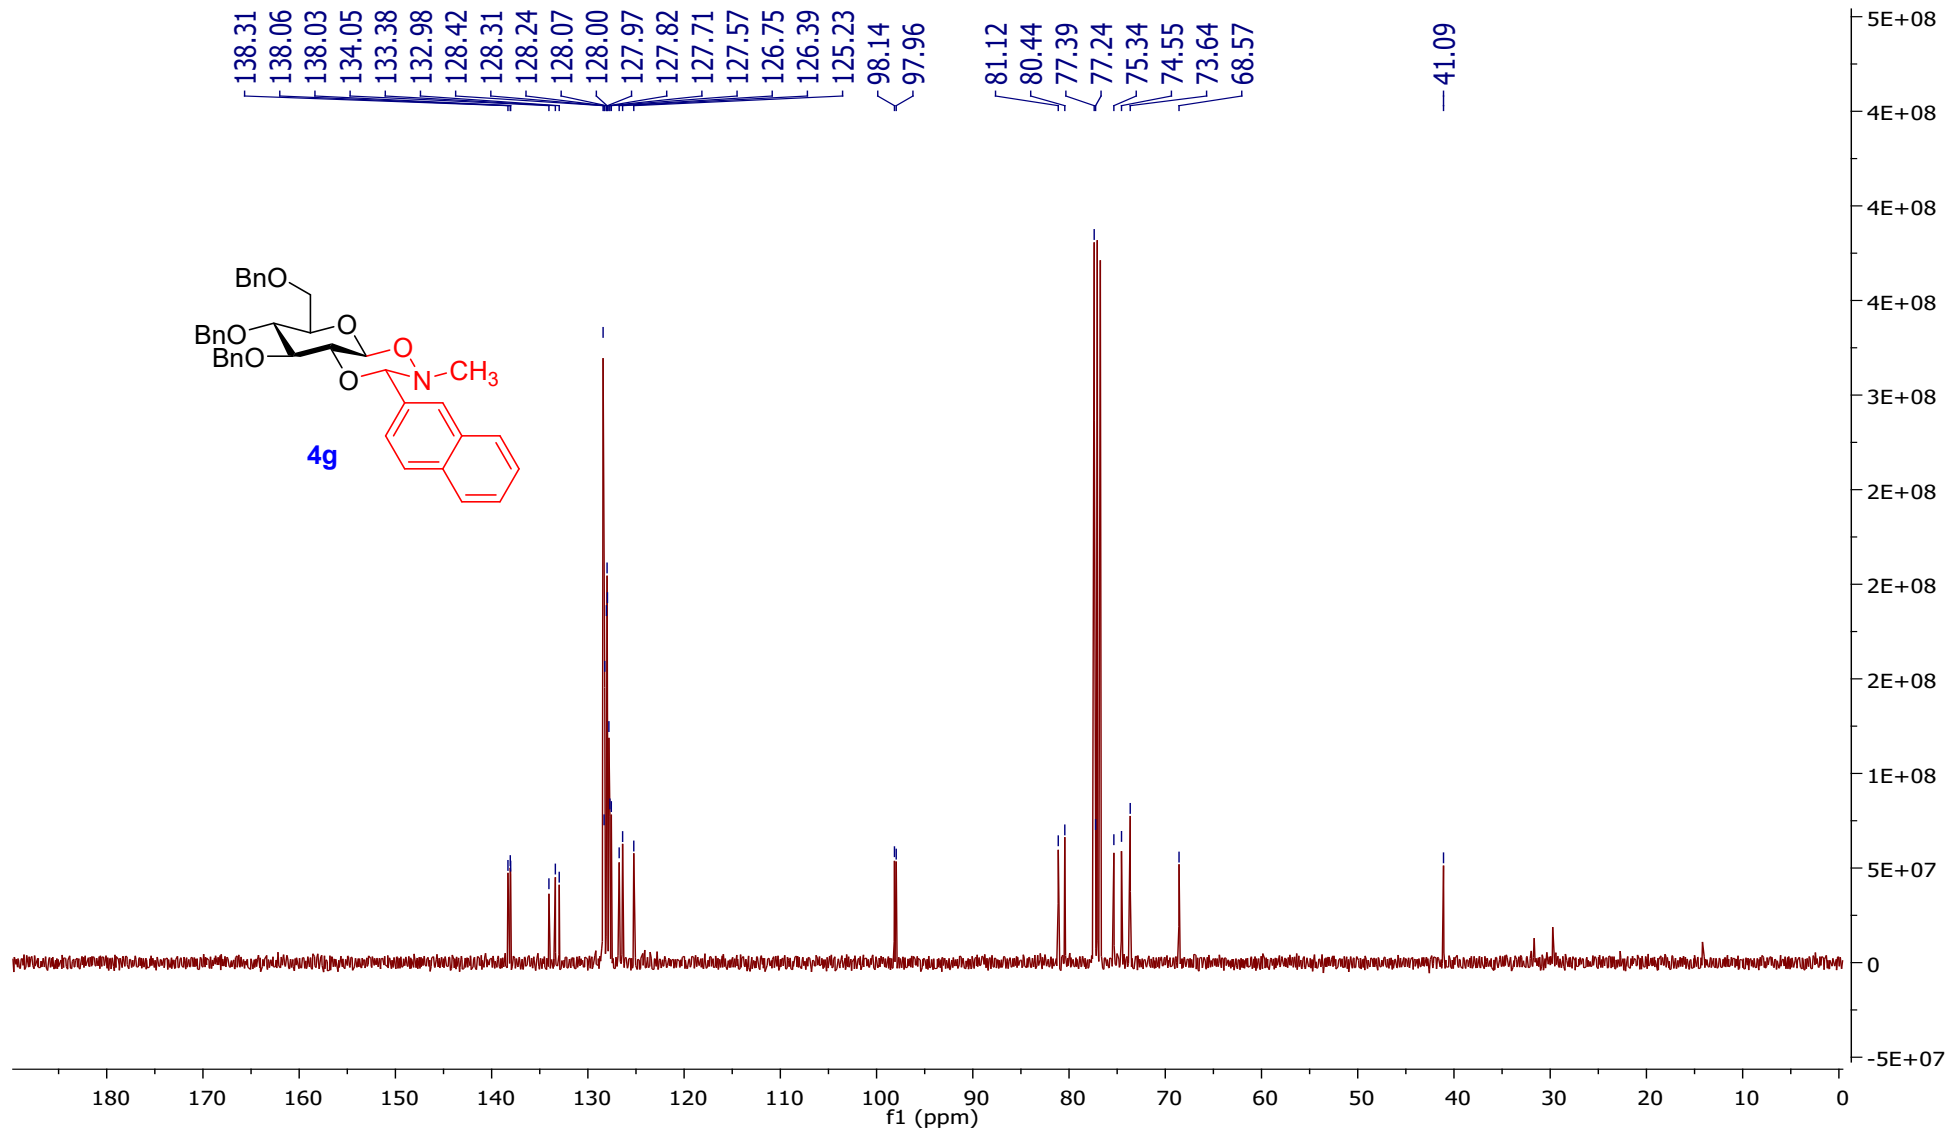

**<sup>1</sup>H NMR (400 MHz) and <sup>13</sup>C NMR (101 MHz) of compound 4h**

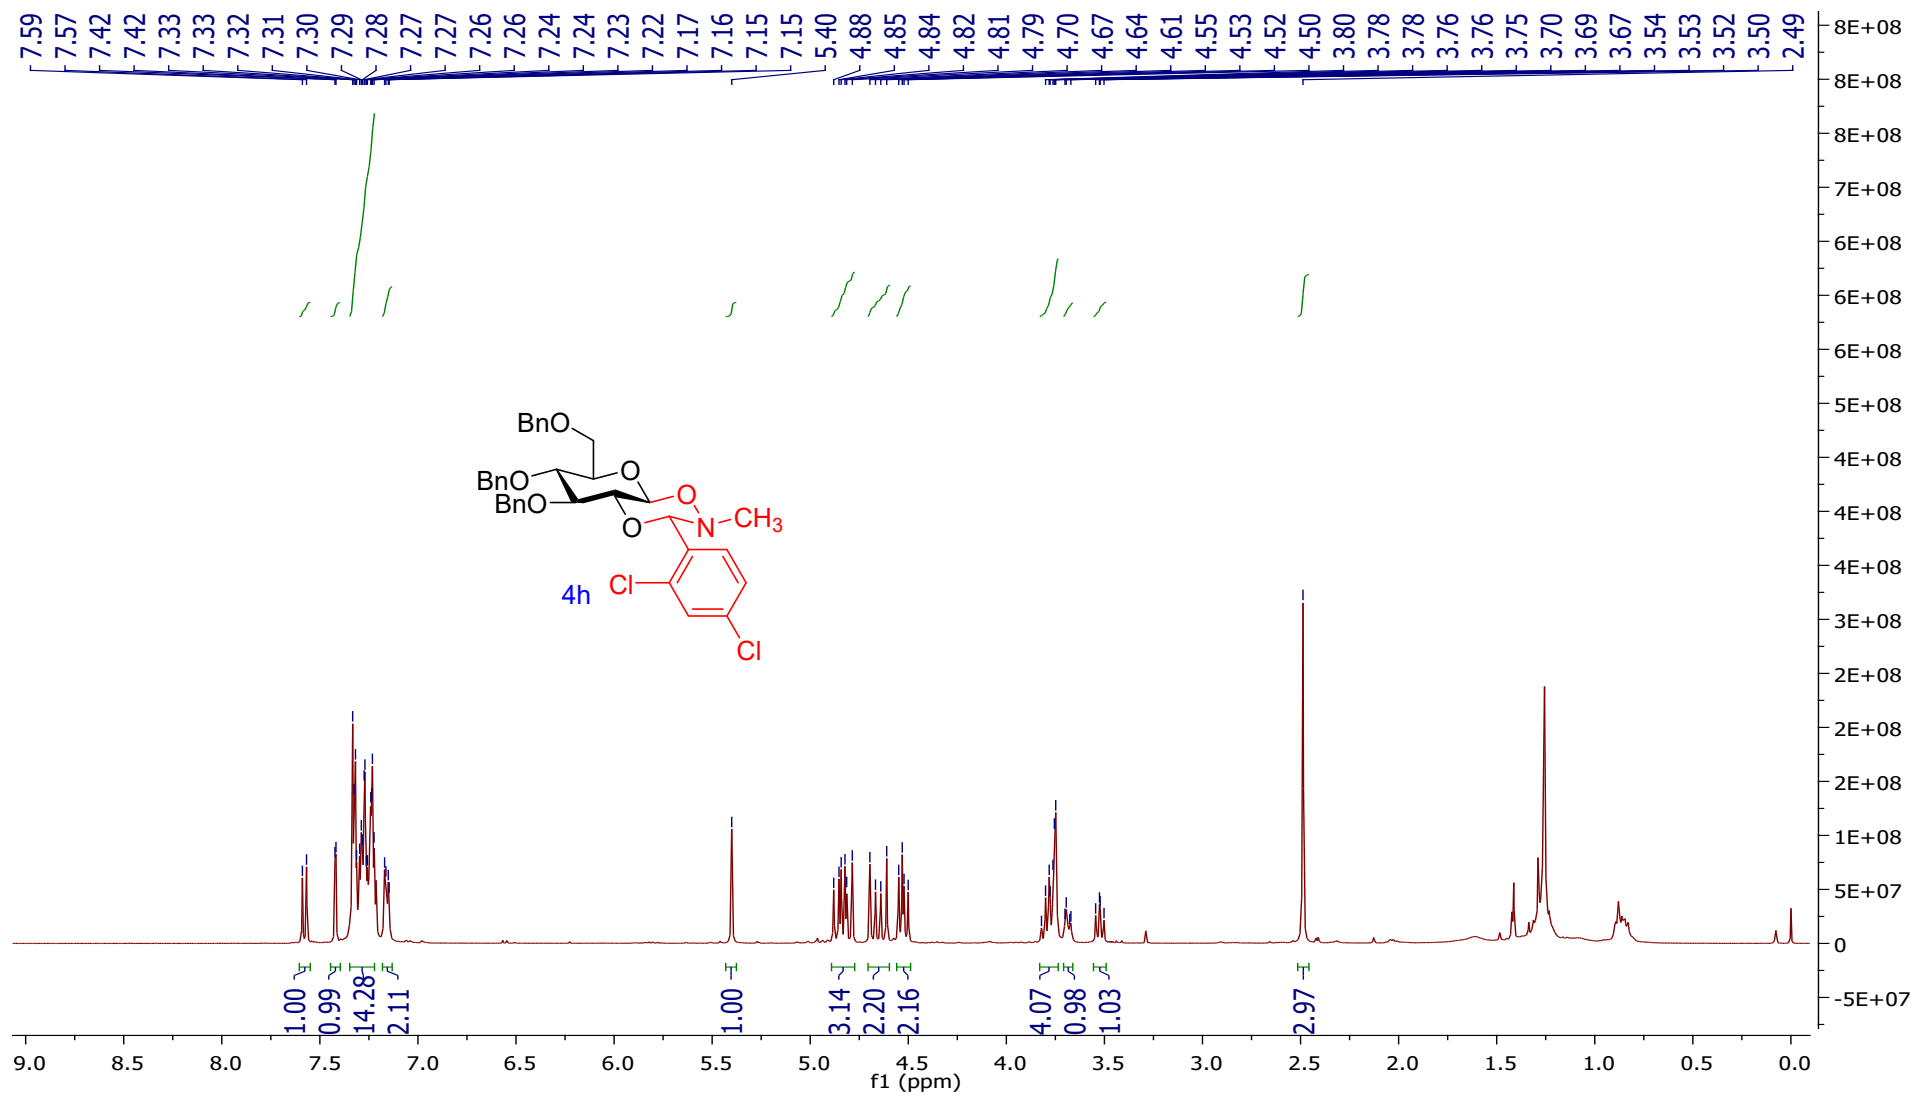



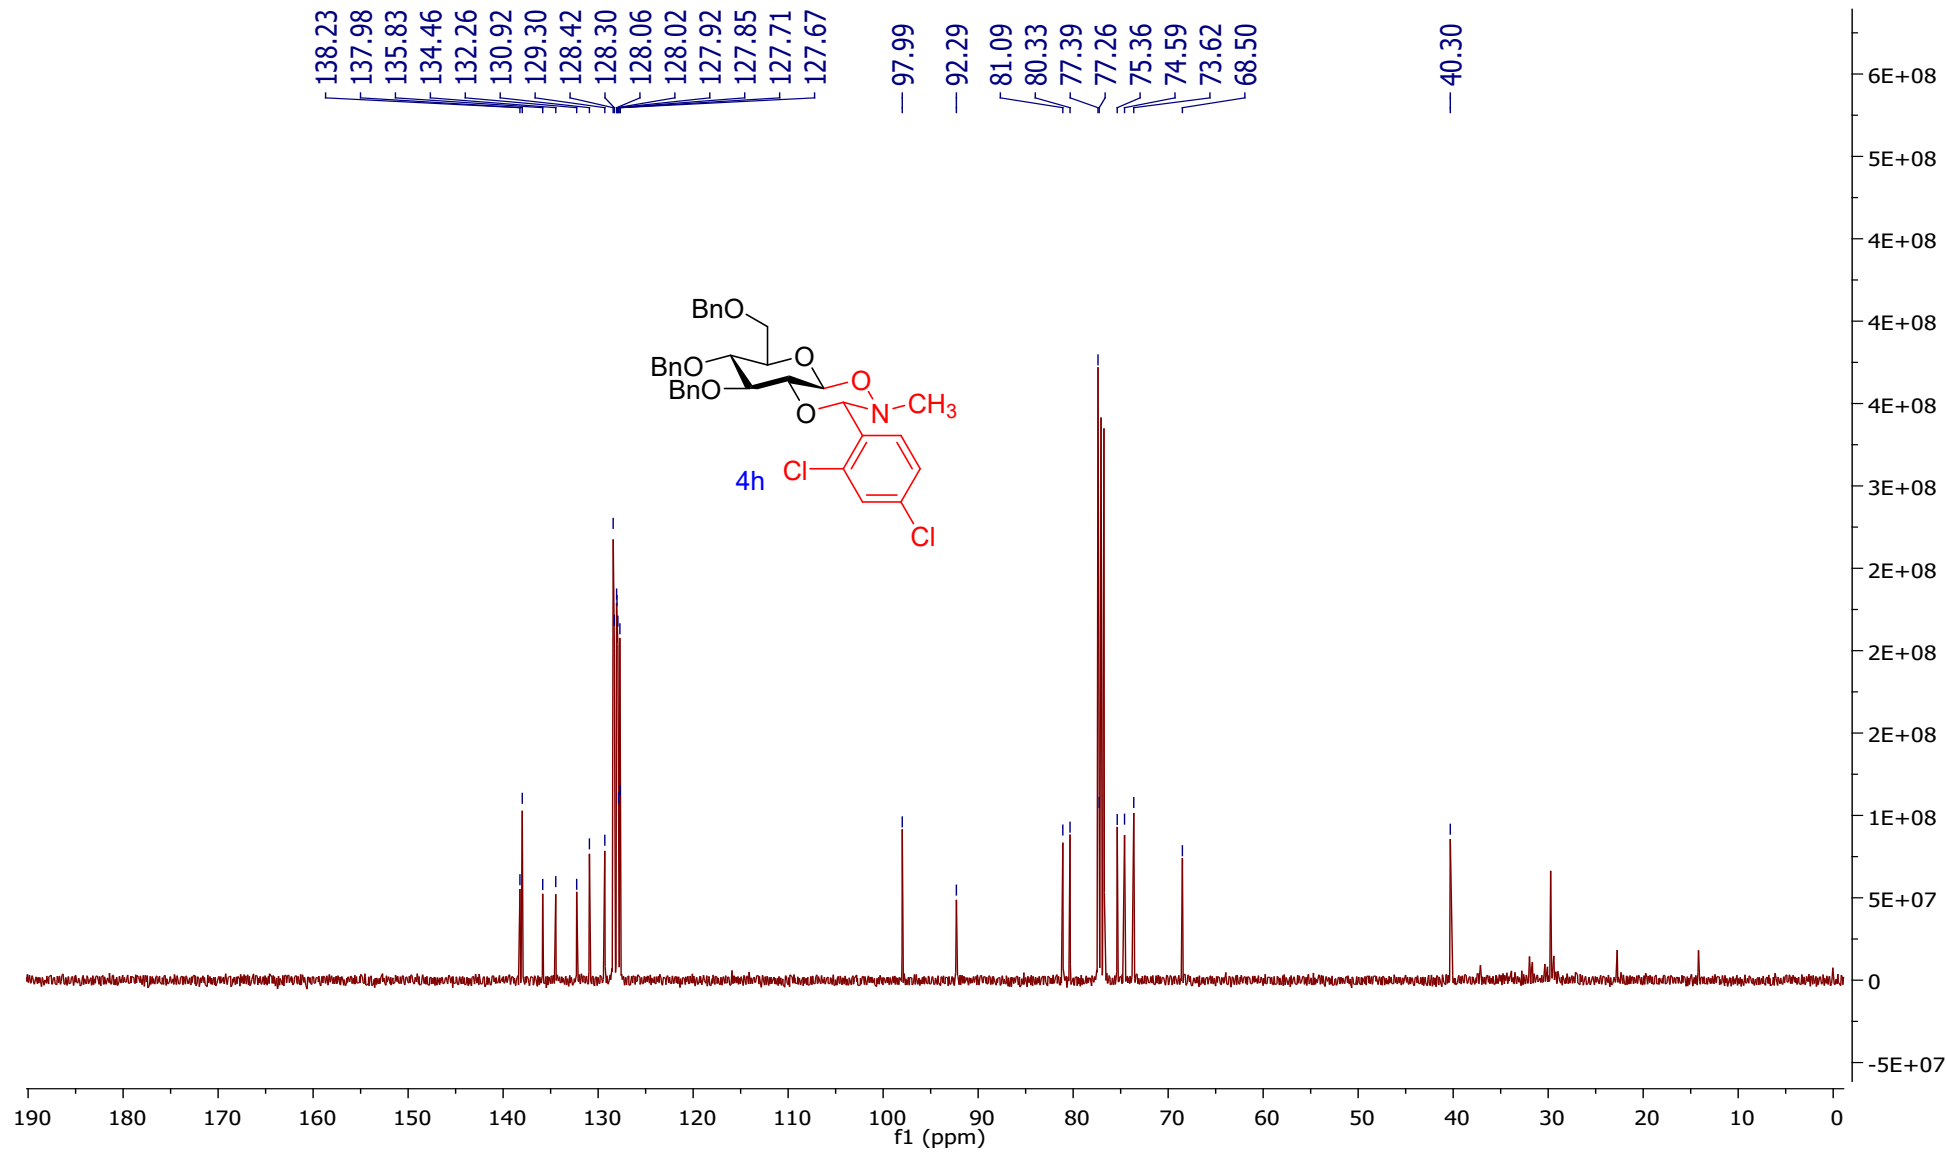

**<sup>1</sup>H NMR (400 MHz) and <sup>13</sup>C NMR (101 MHz) of compound 4i**

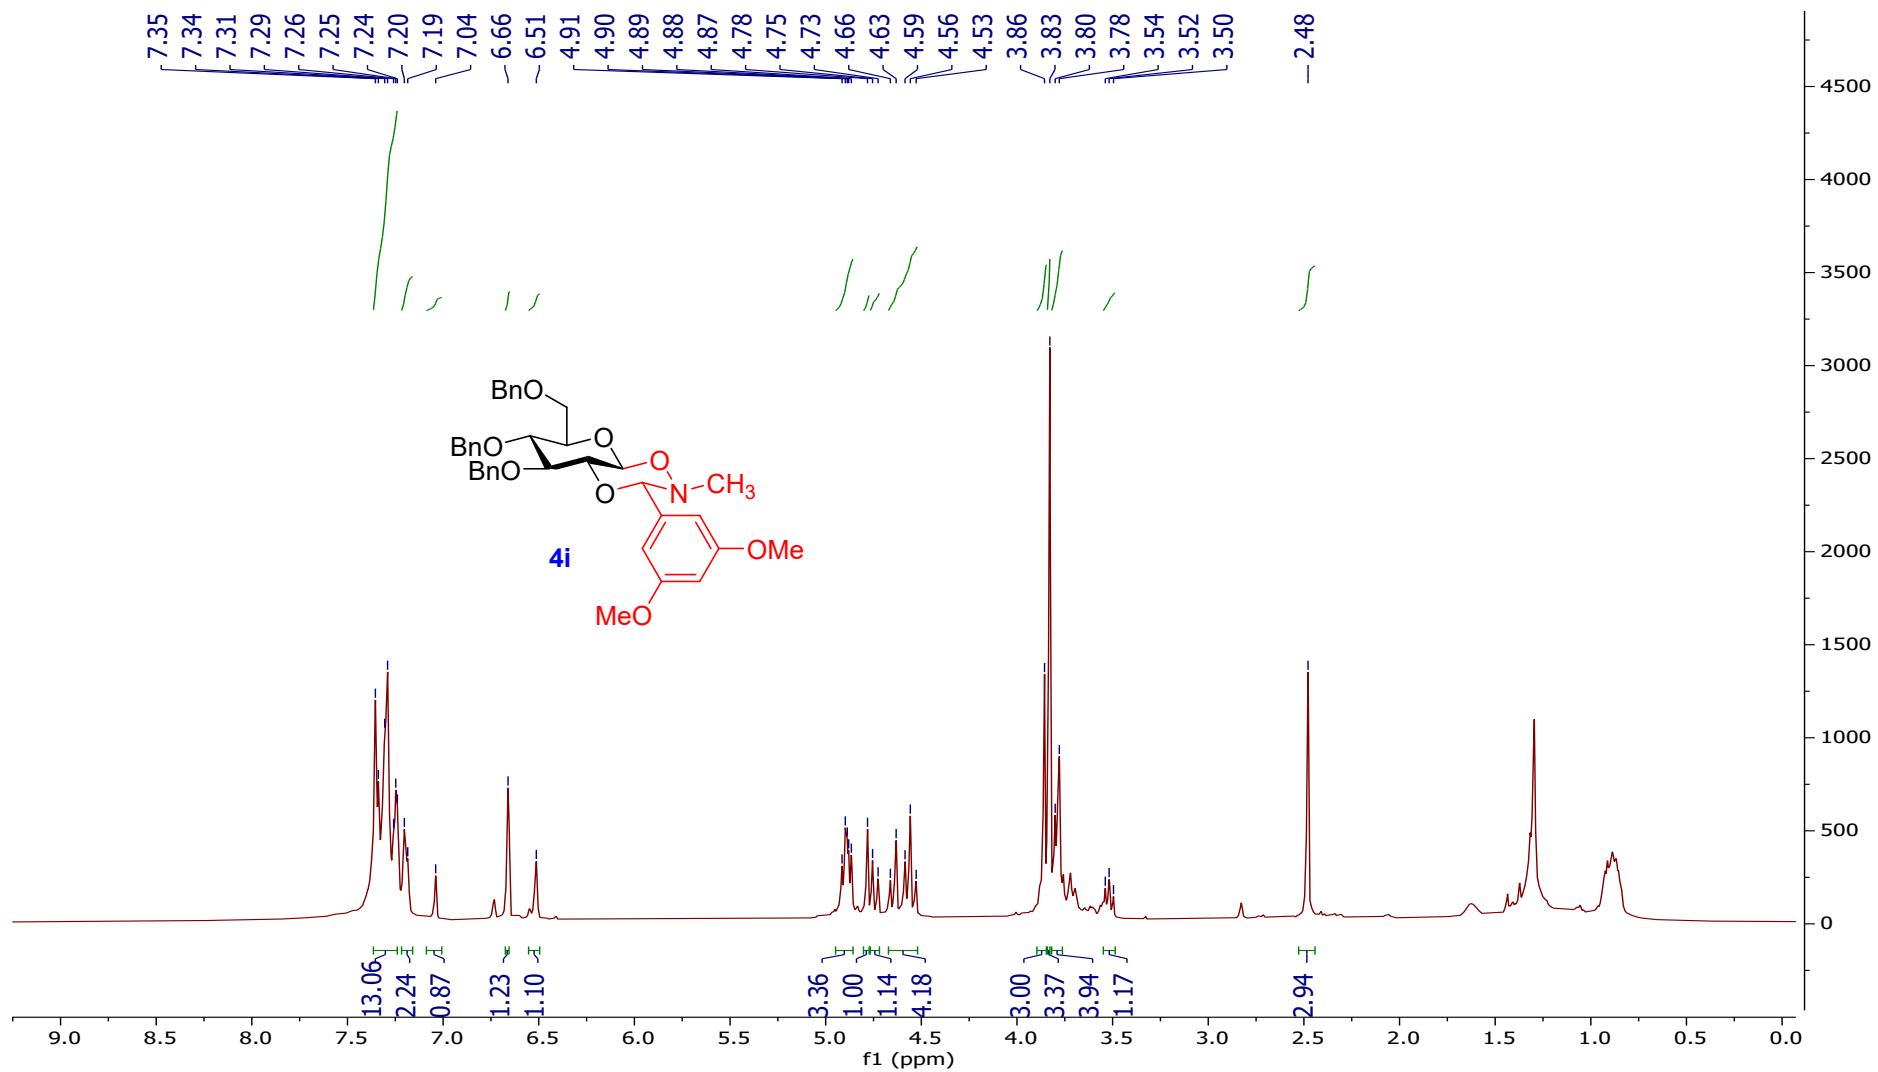

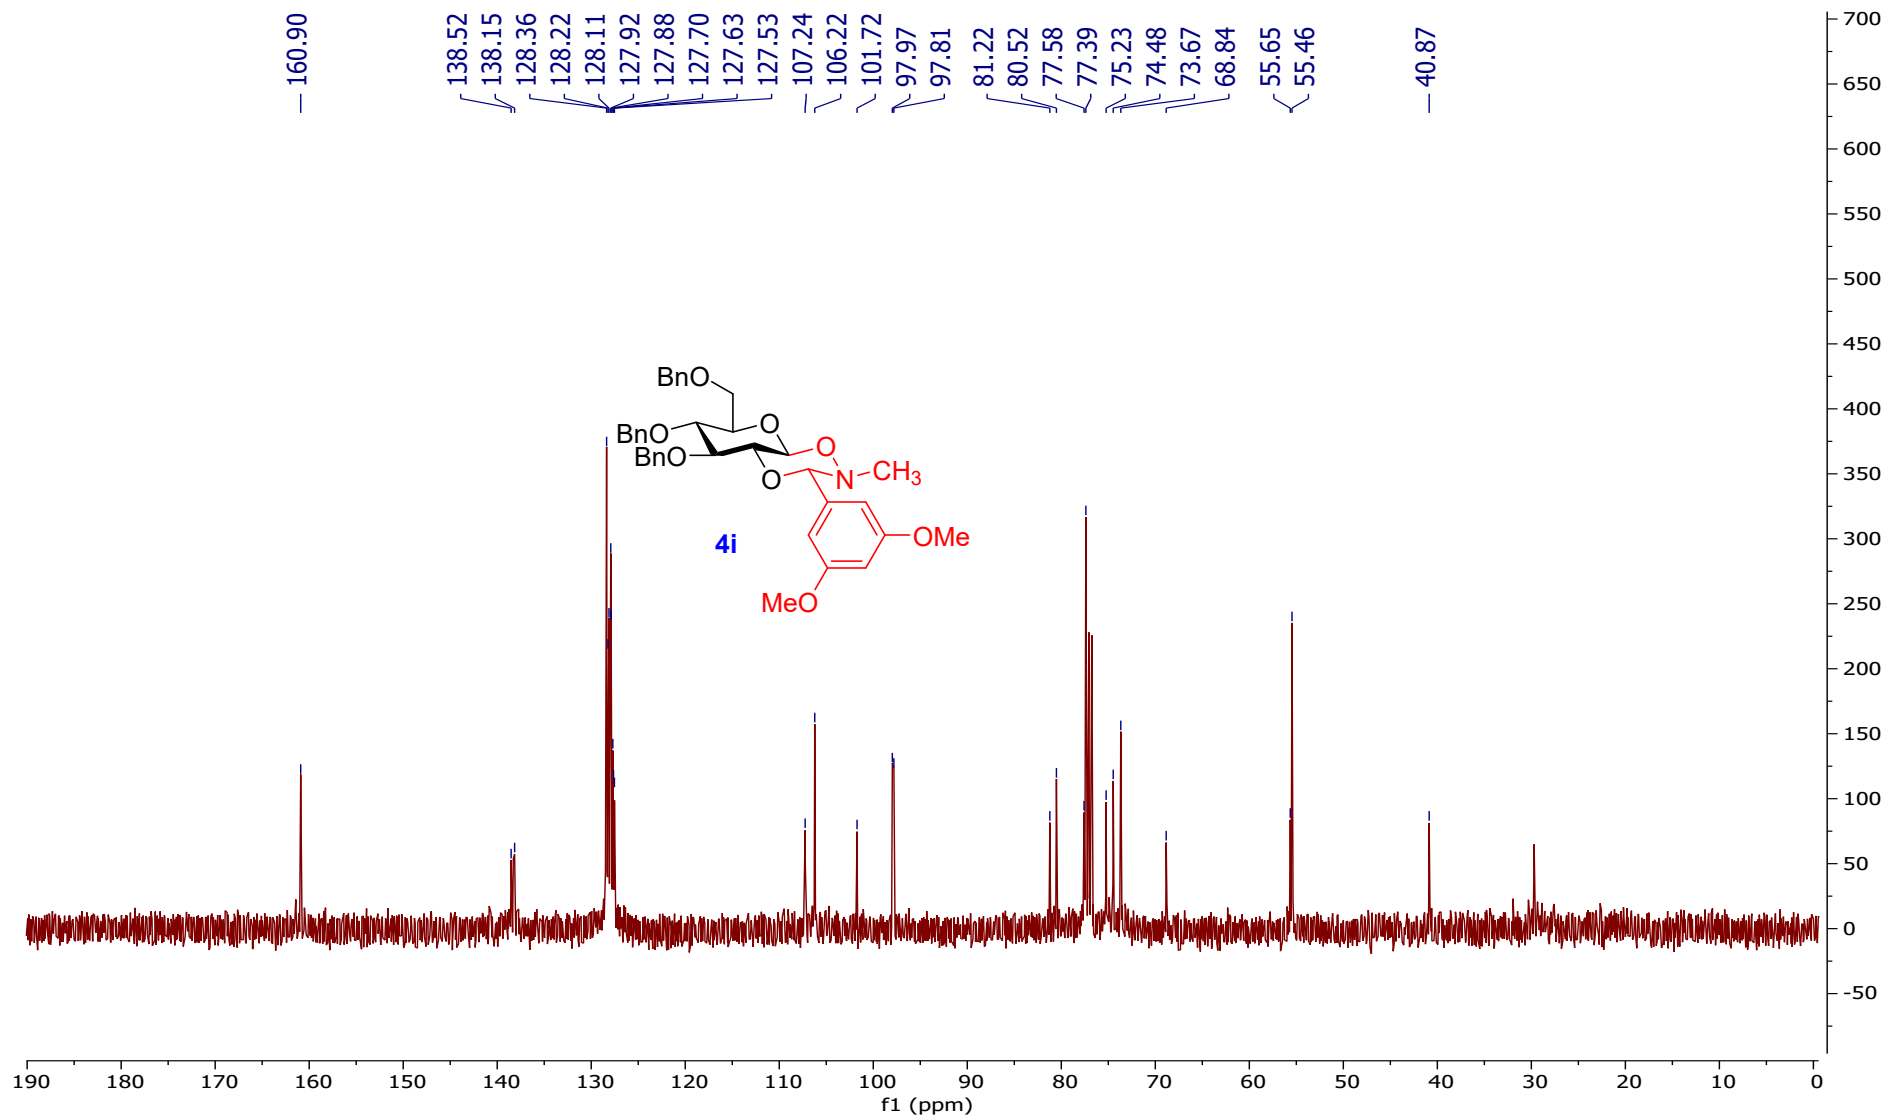

**<sup>1</sup>H NMR (400 MHz) and <sup>13</sup>C NMR (101 MHz) of compound 4j**

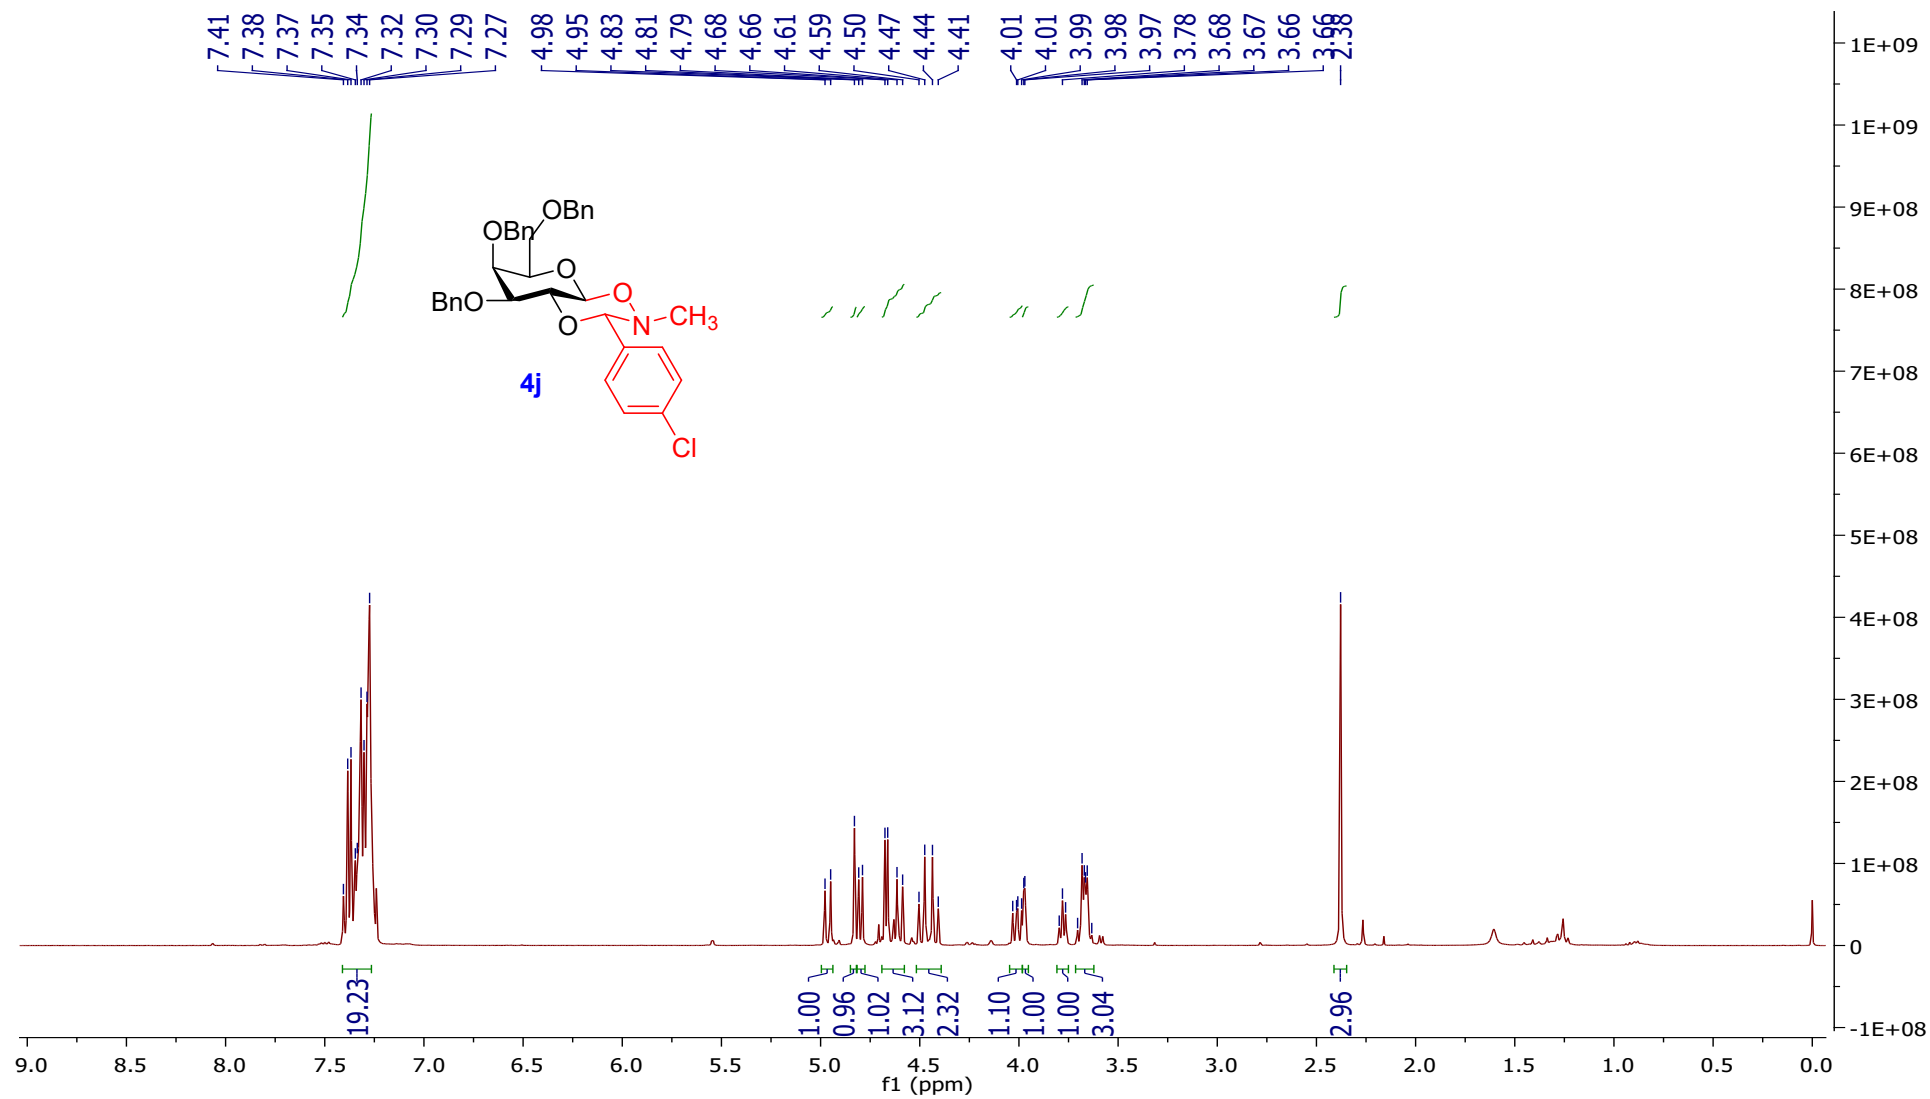

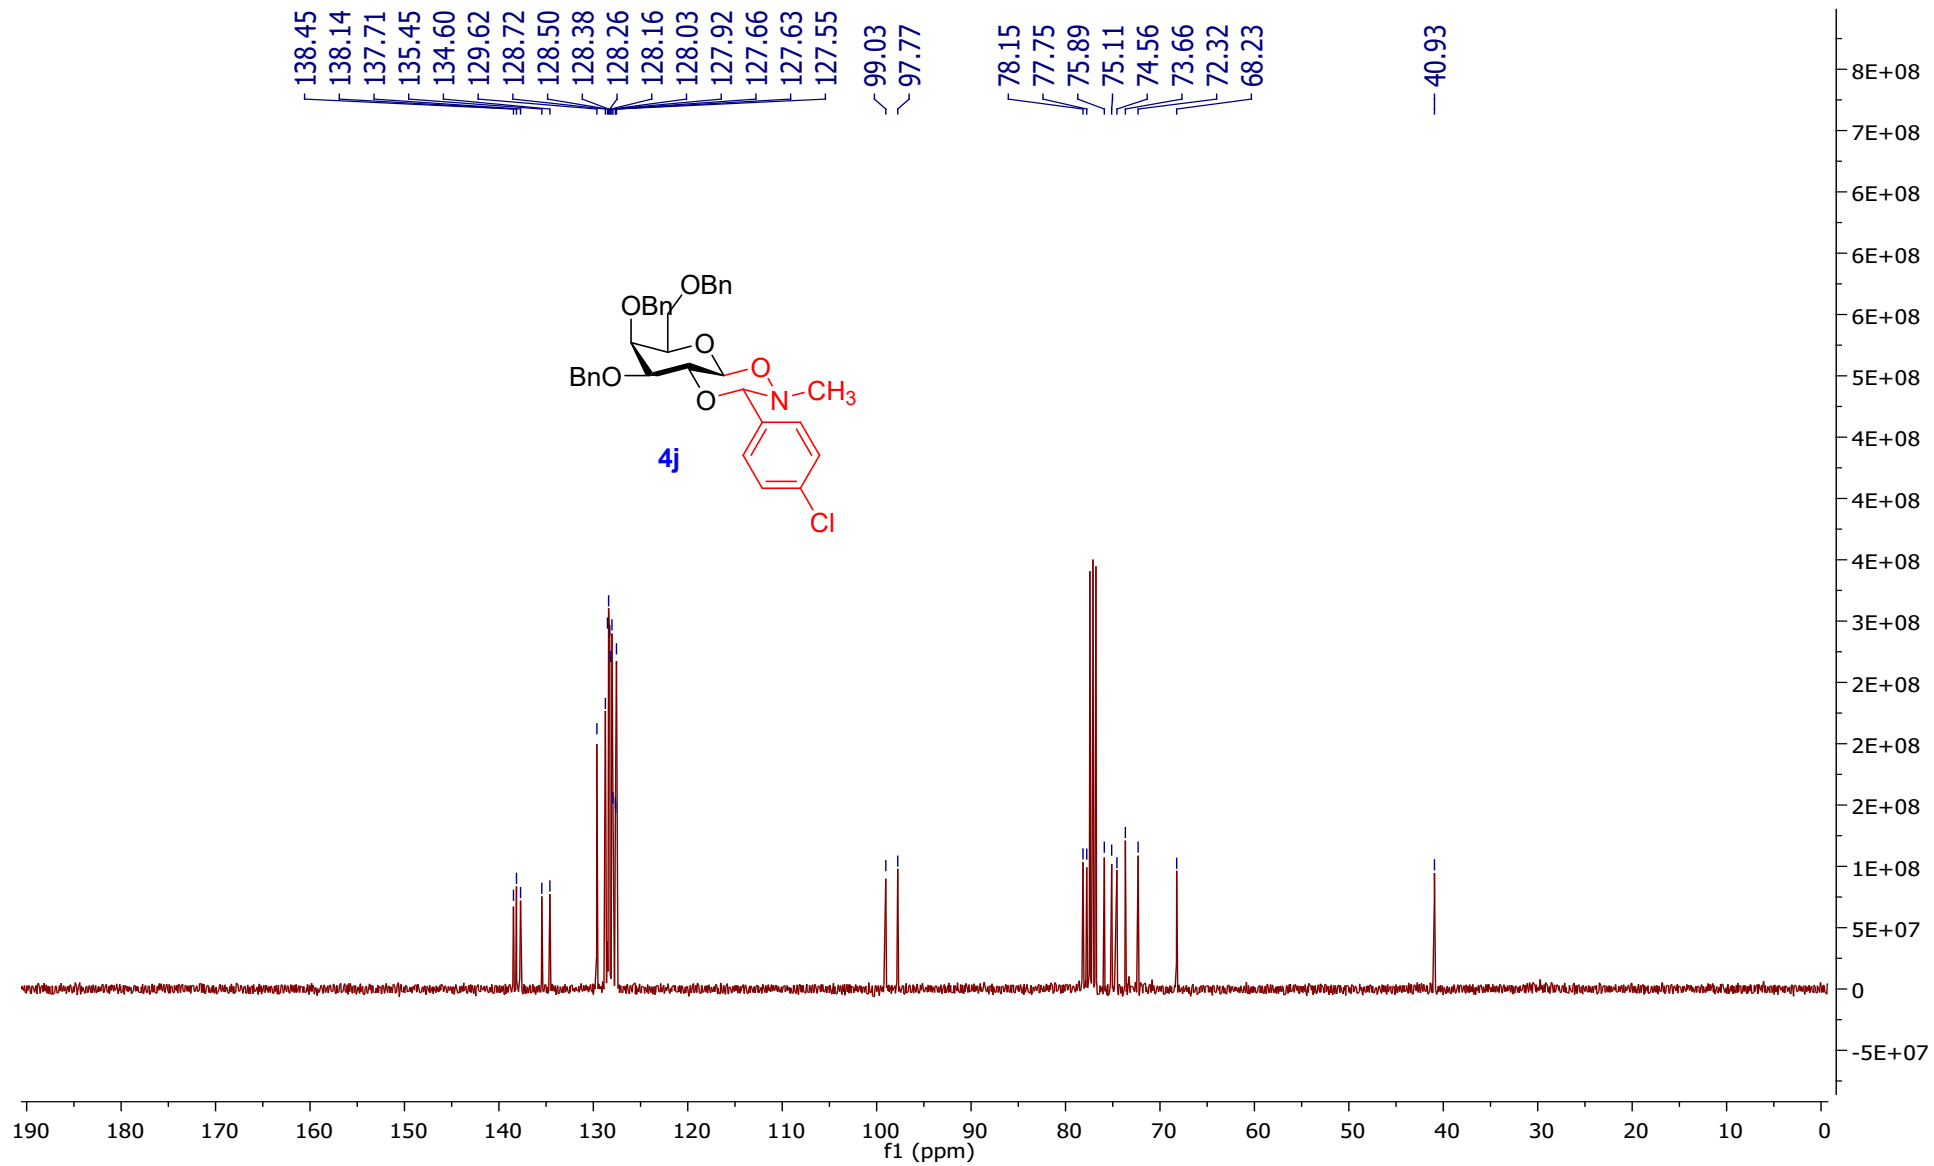

<sup>1</sup>H NMR (400 MHz) and <sup>13</sup>C NMR (101 MHz) of compound 4k

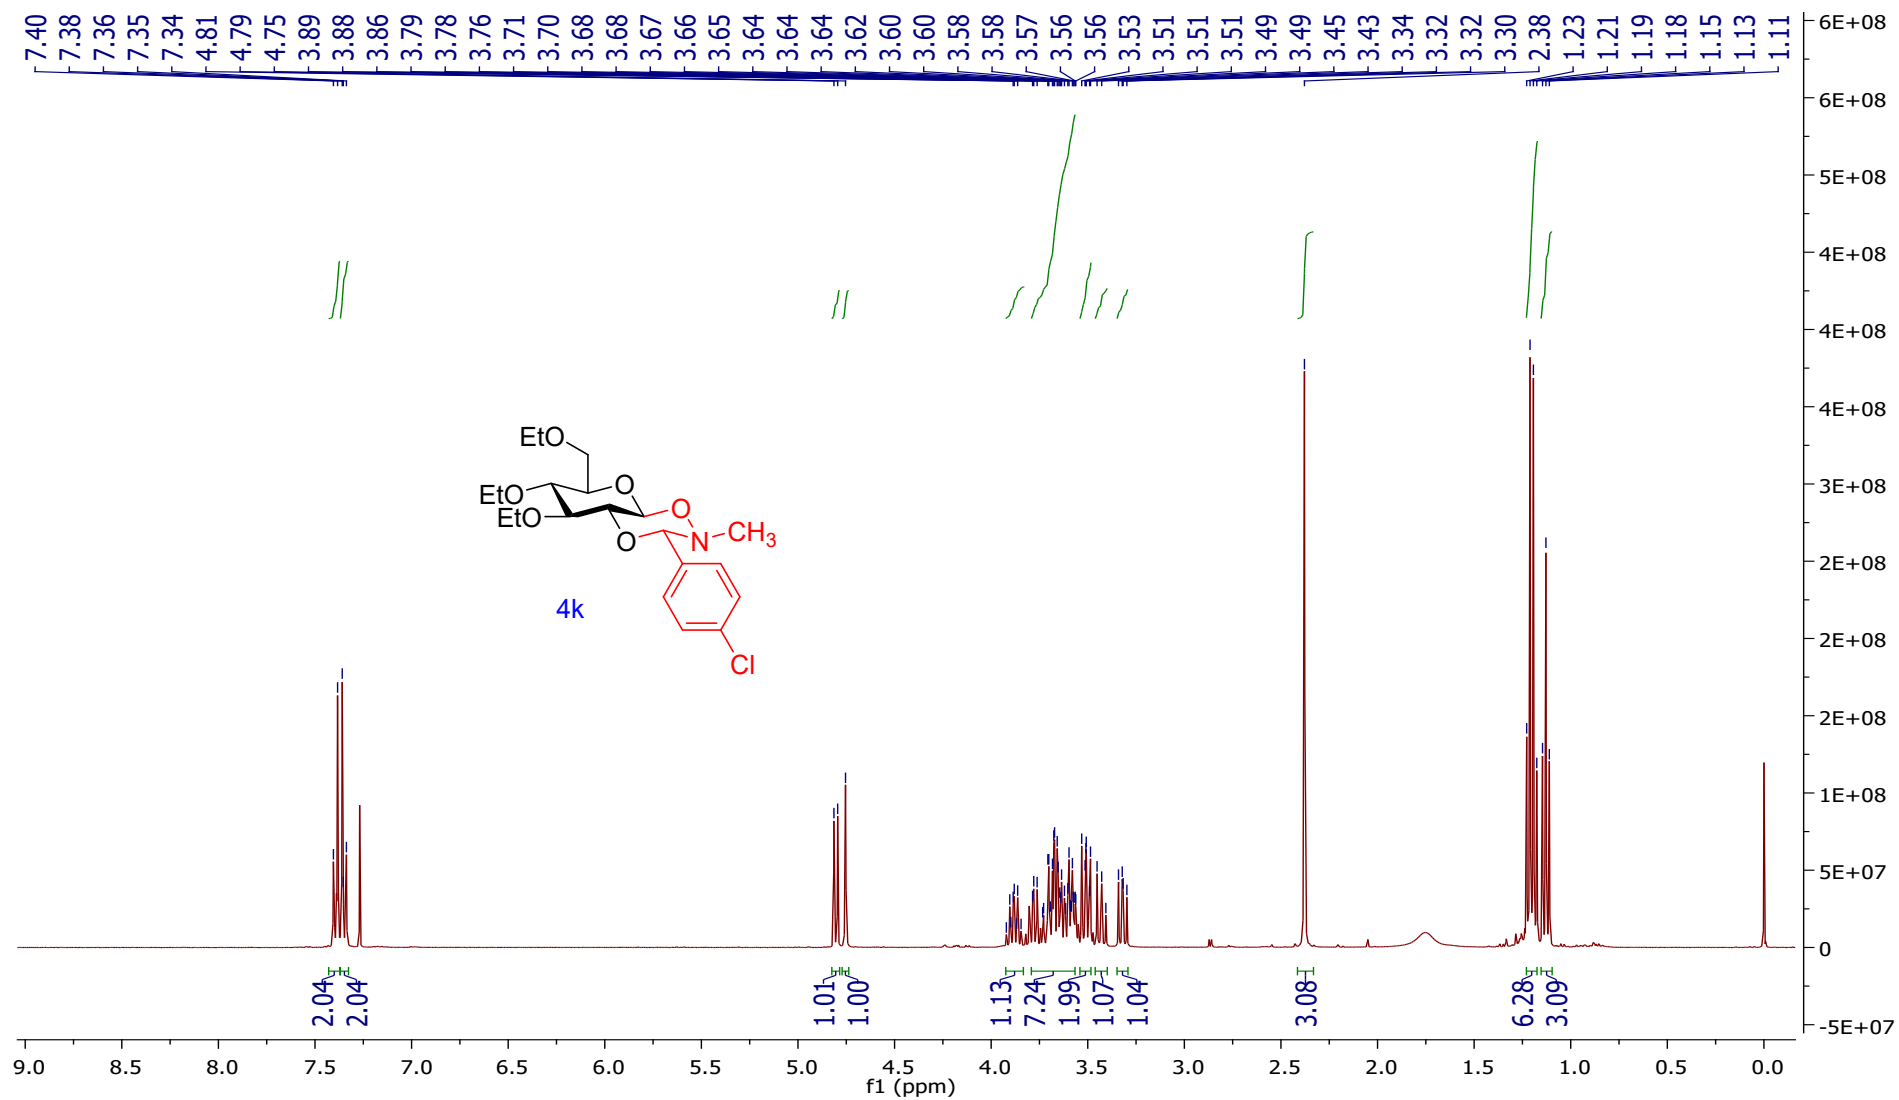

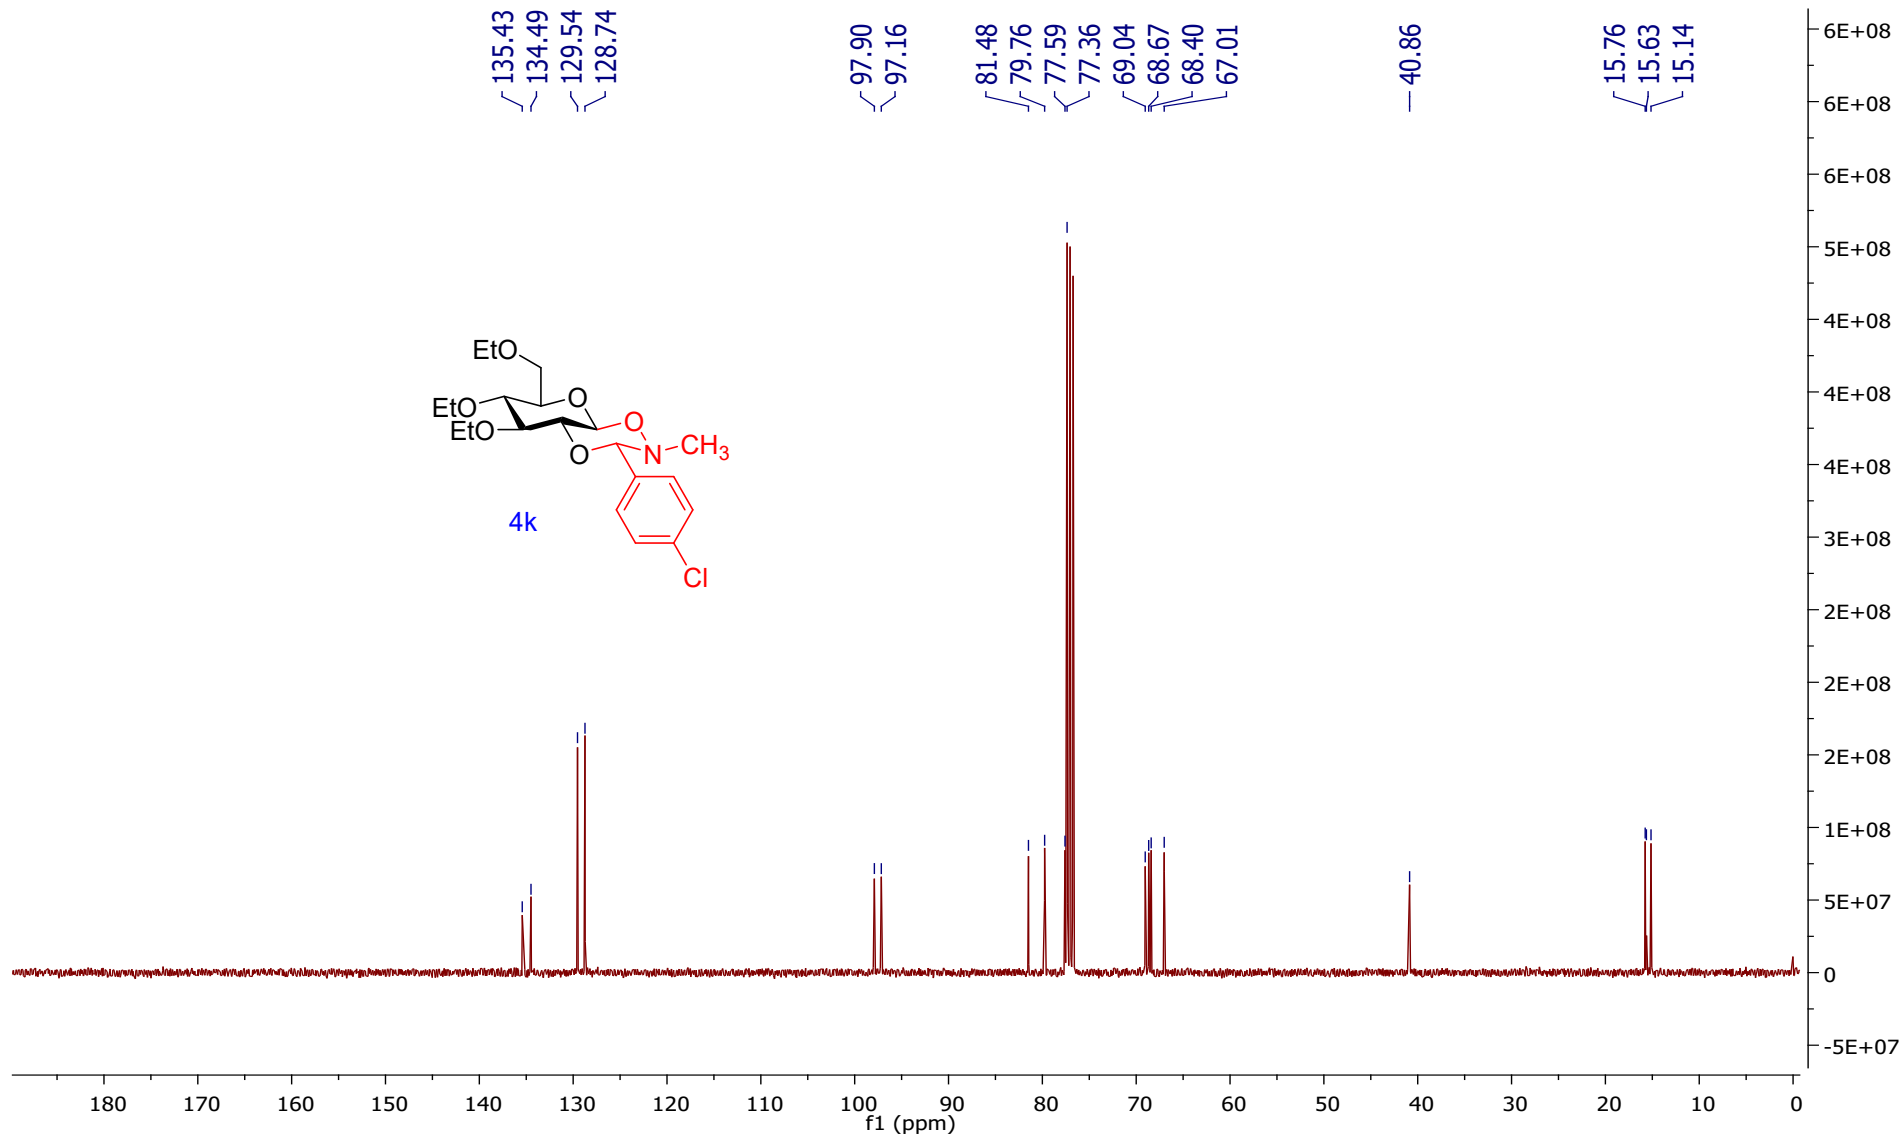

**<sup>1</sup>H NMR (400 MHz) and <sup>13</sup>C NMR (101 MHz) of compound 5a**

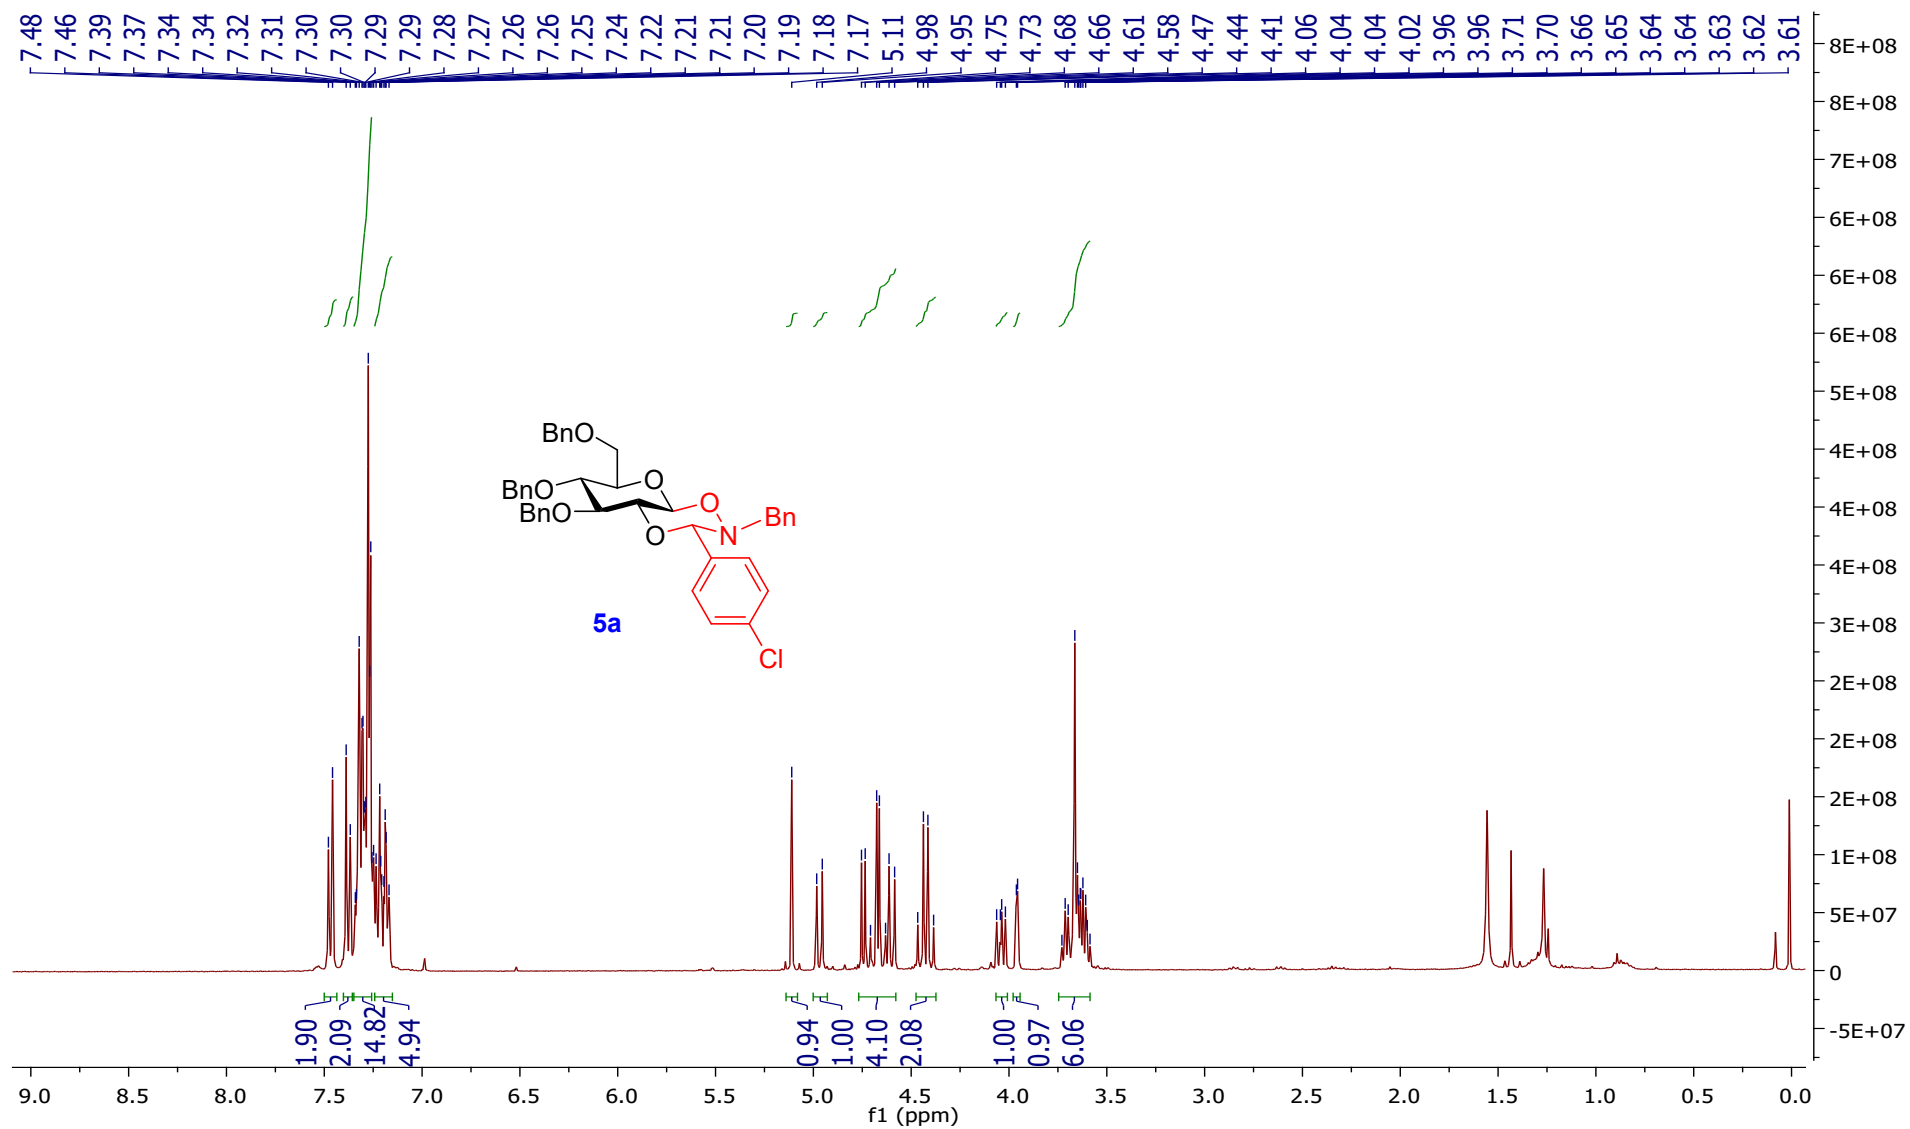



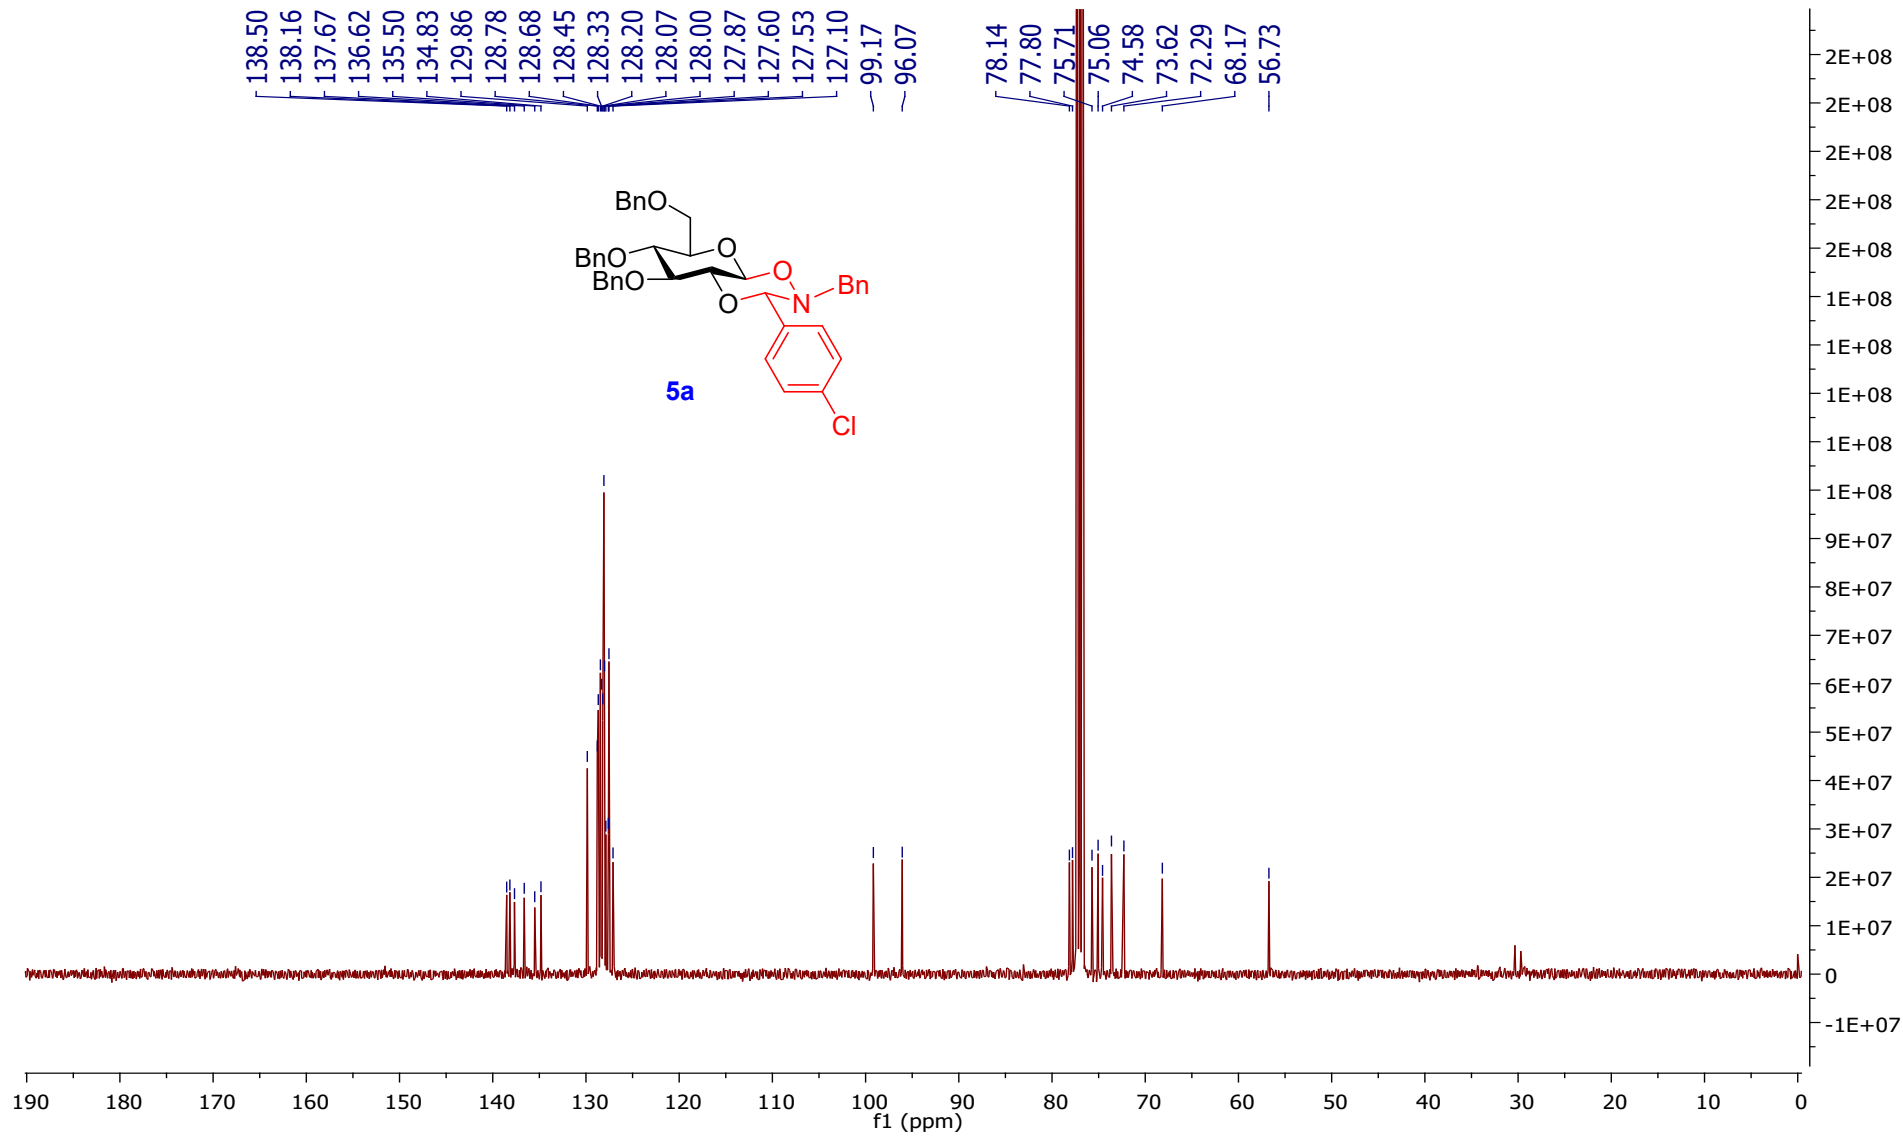

**<sup>1</sup>H NMR (400 MHz) and <sup>13</sup>C NMR (101 MHz) of compound 5b**

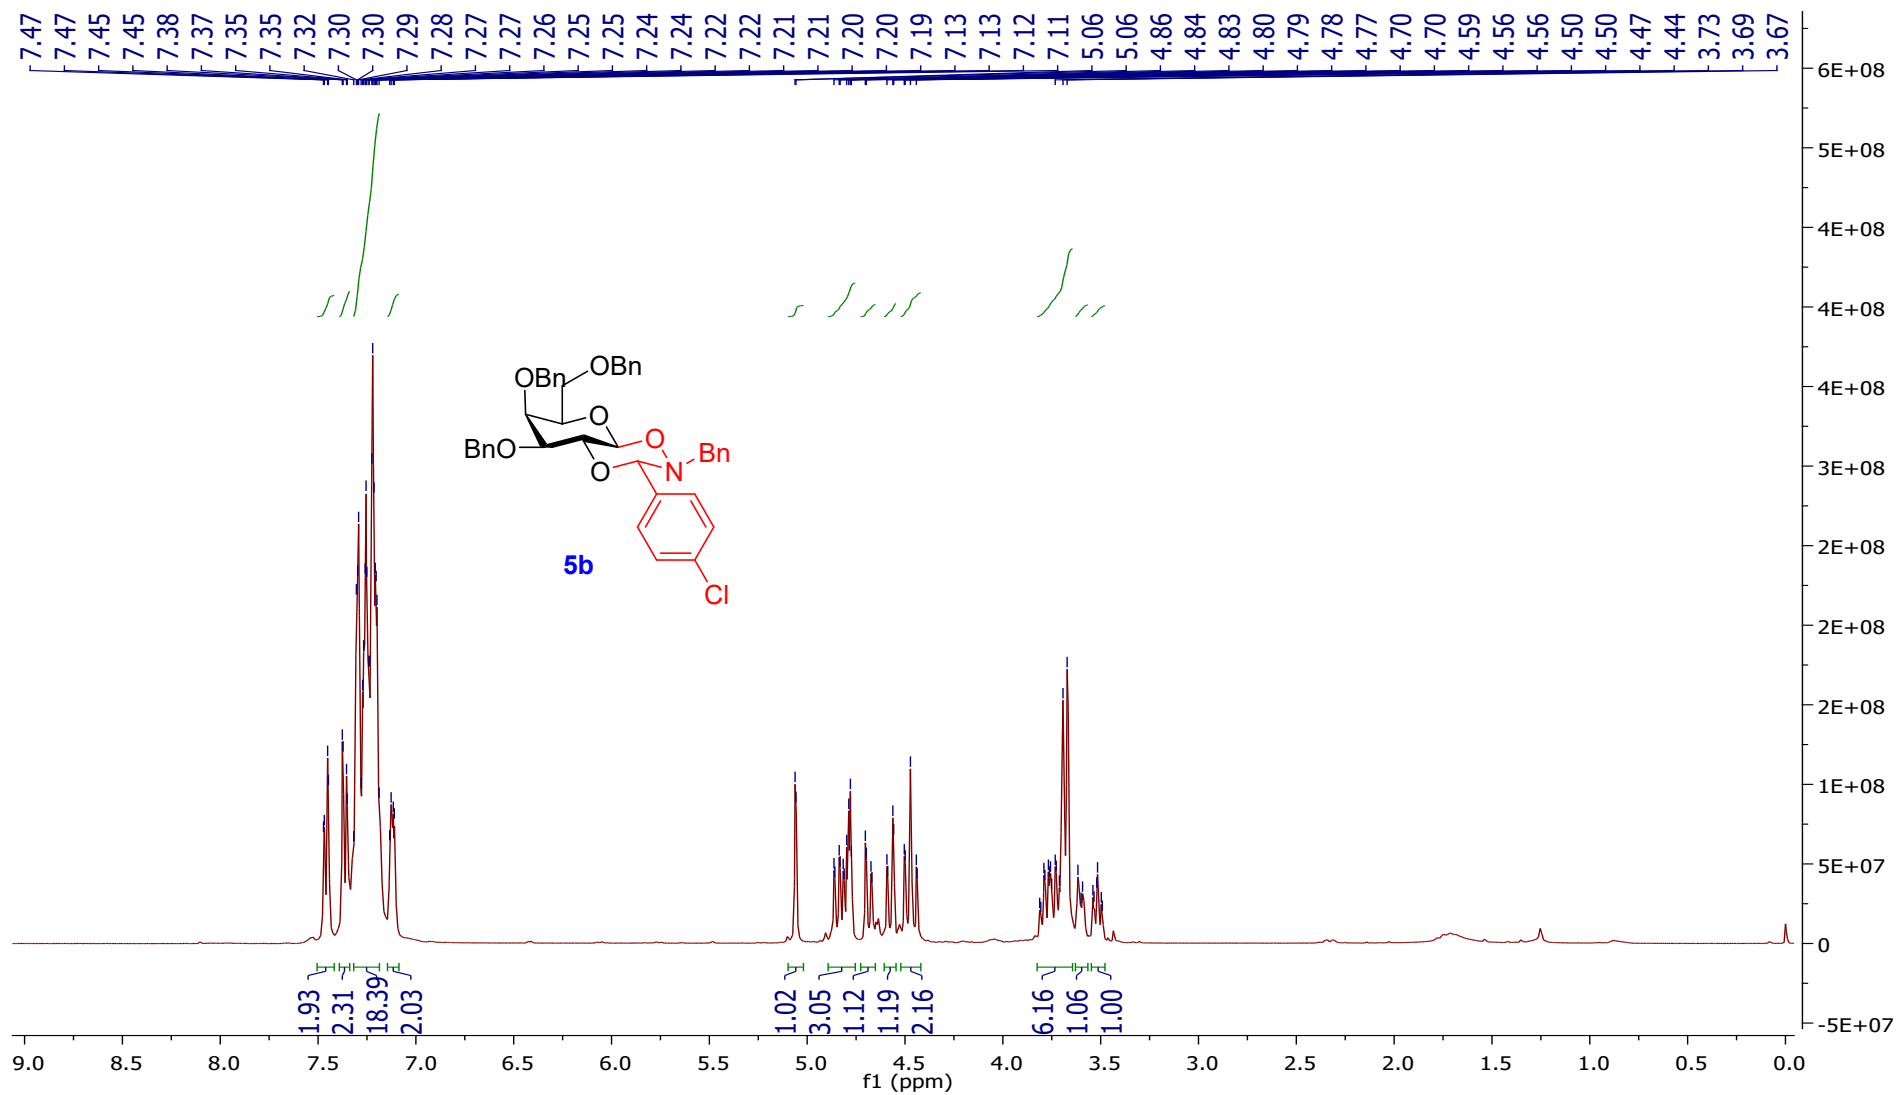

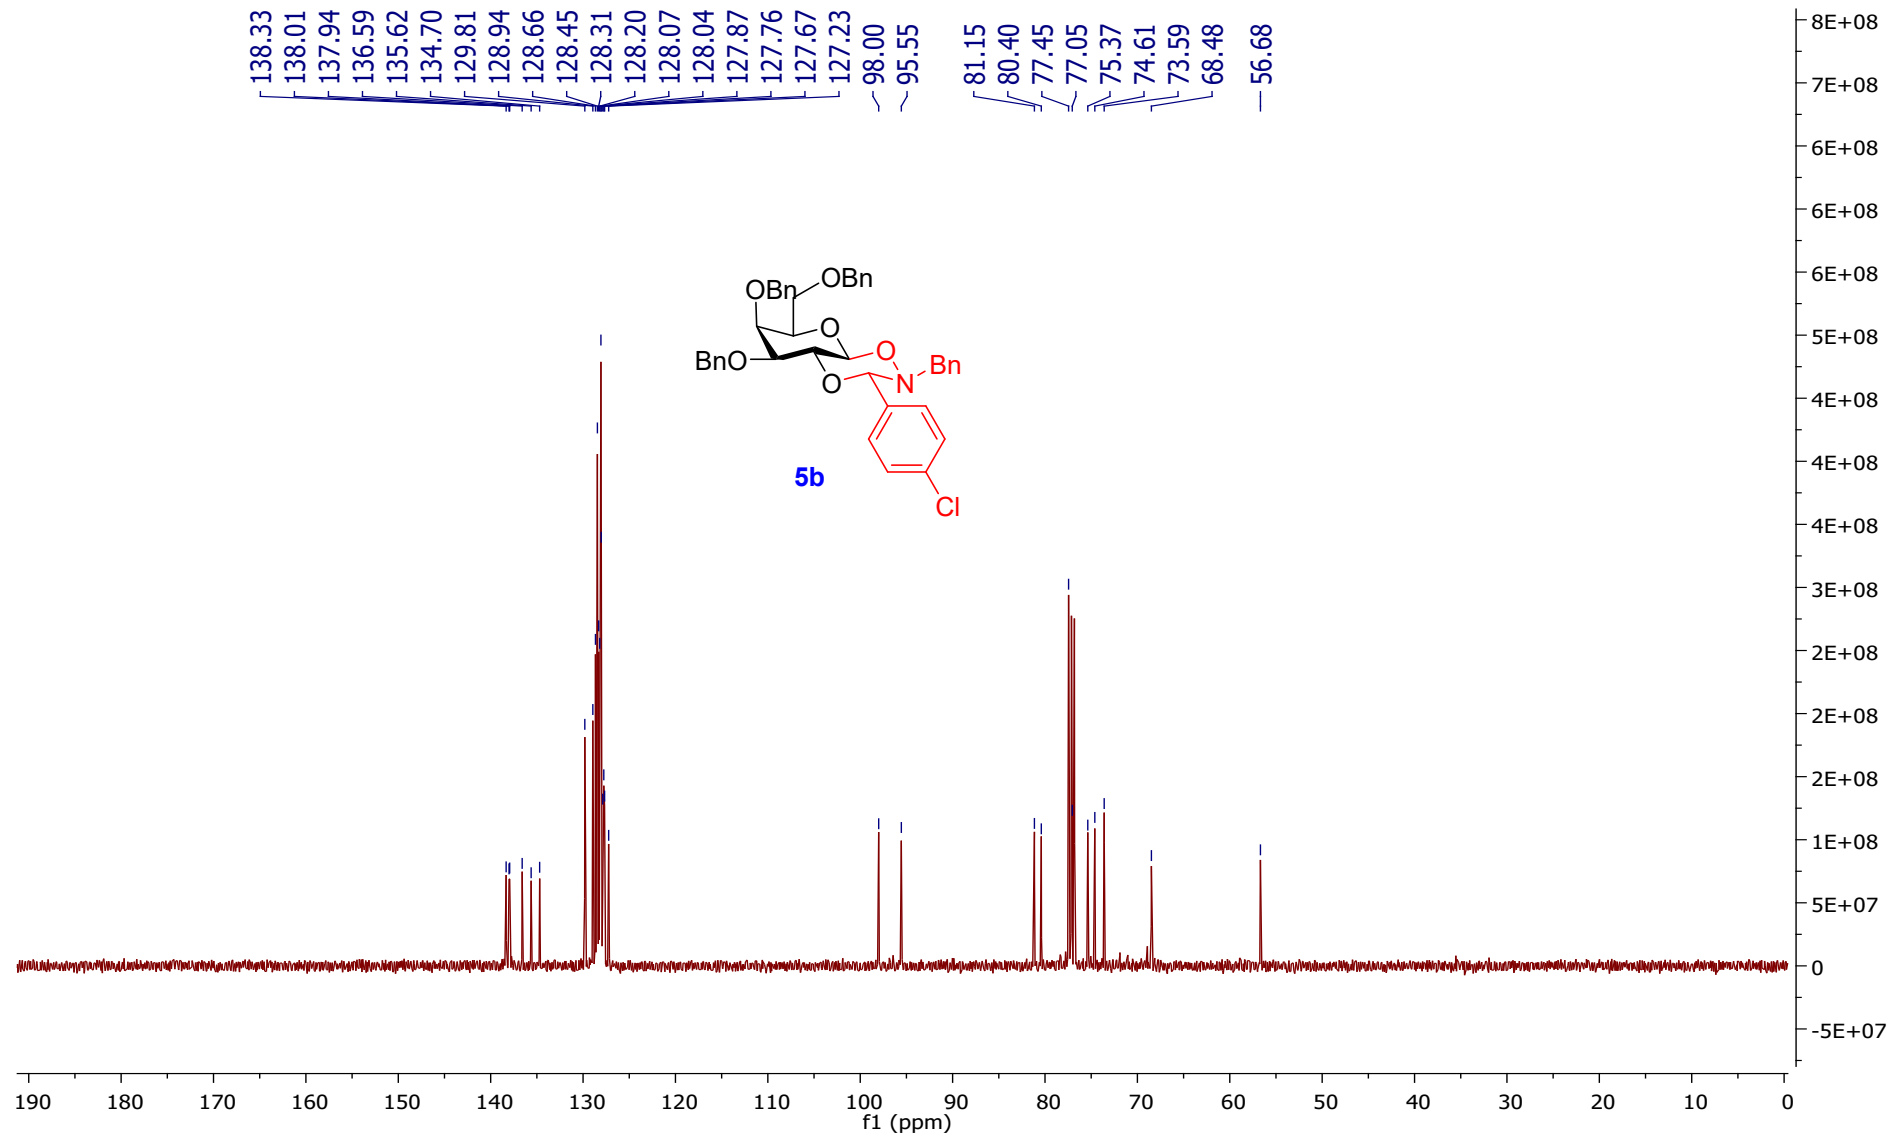

**<sup>1</sup>H NMR (400 MHz) and <sup>13</sup>C NMR (101 MHz) of compound 5c**

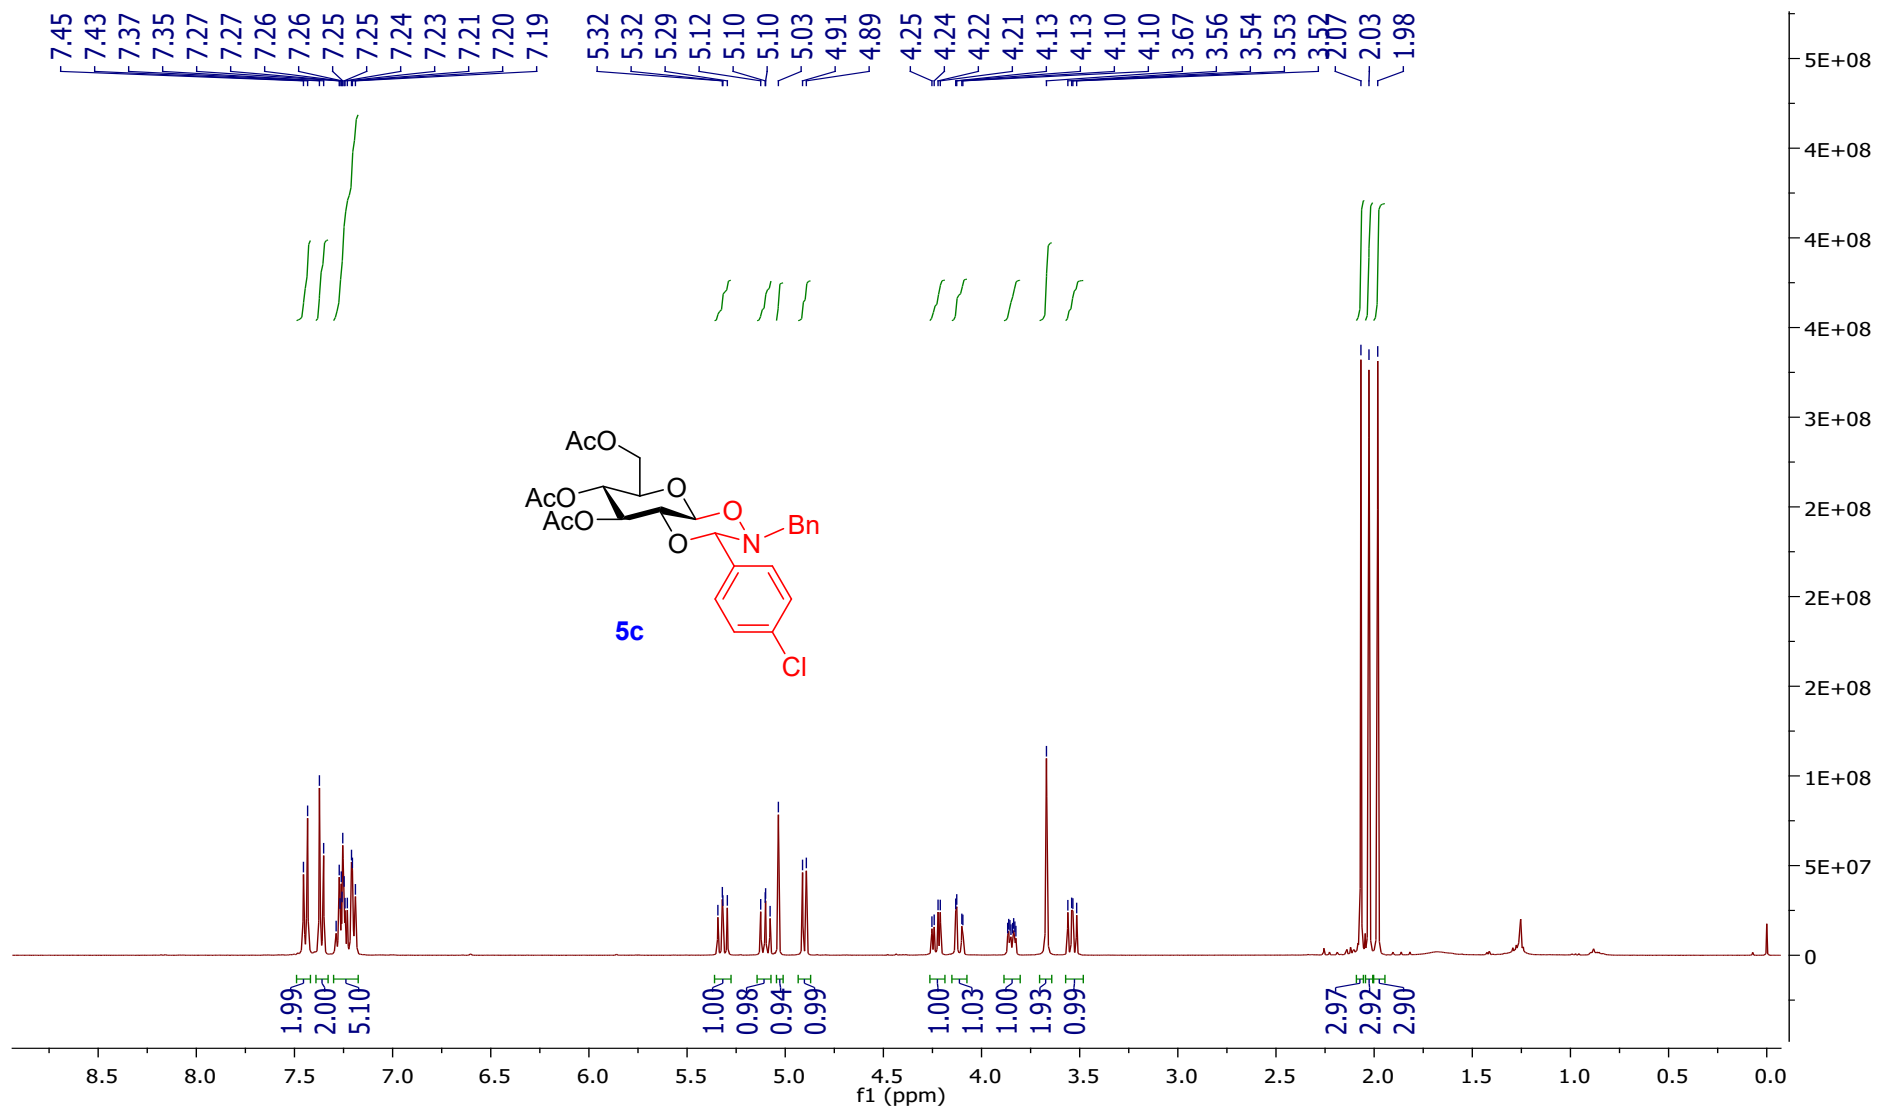

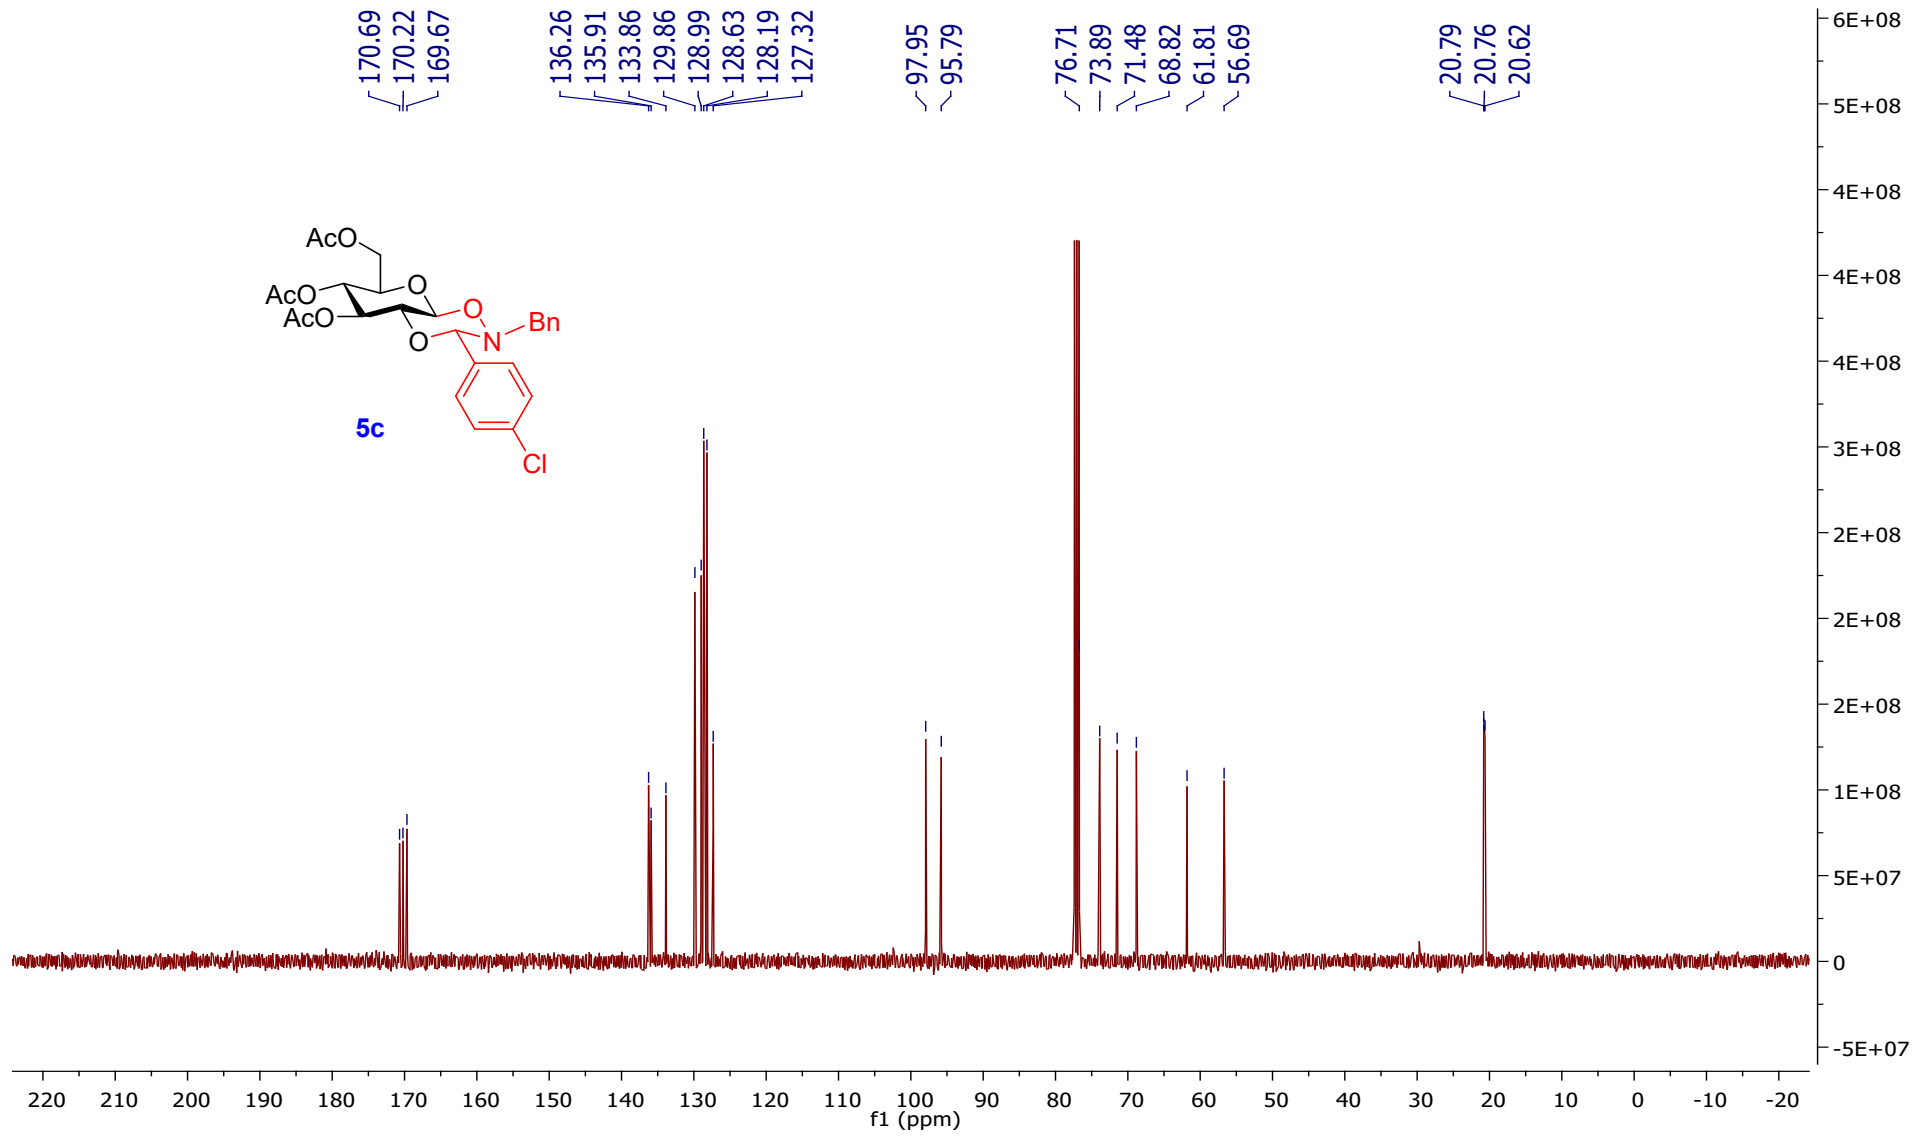

**<sup>1</sup>H NMR (400 MHz) of compound 3a**

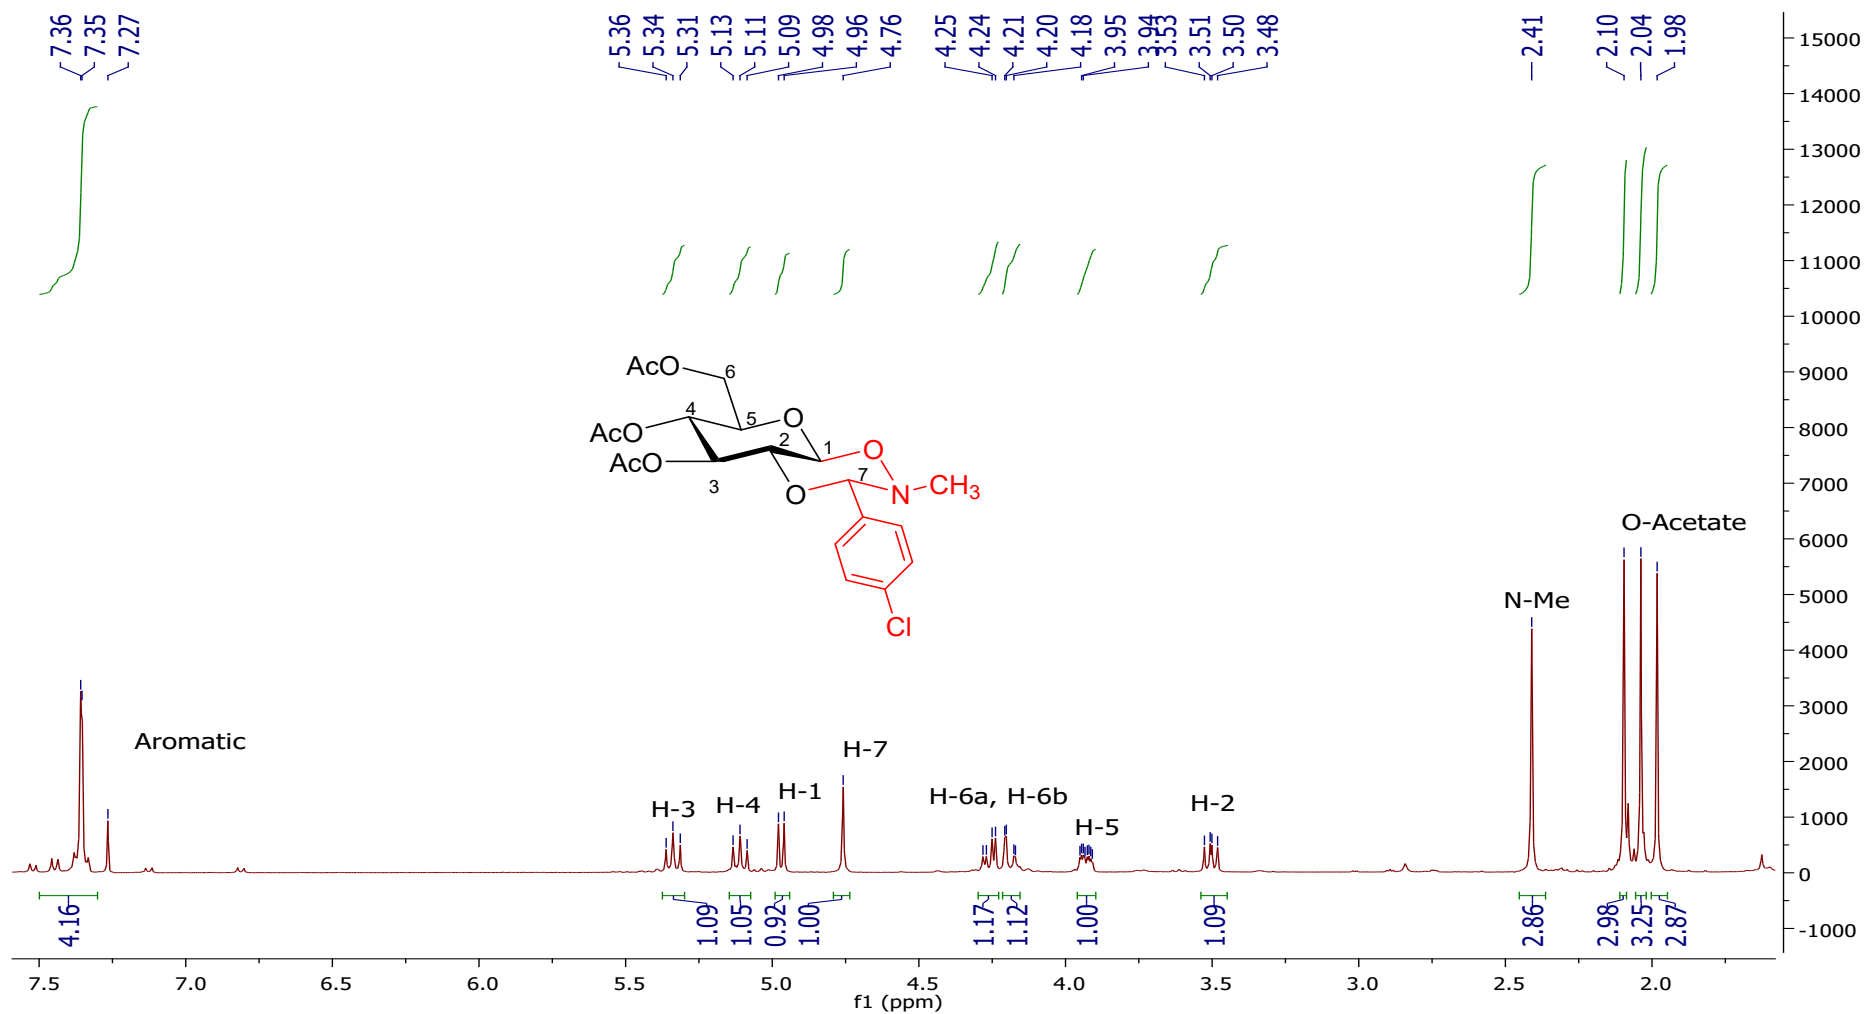

<sup>13</sup>C NMR (101 MHz) of compound 3a

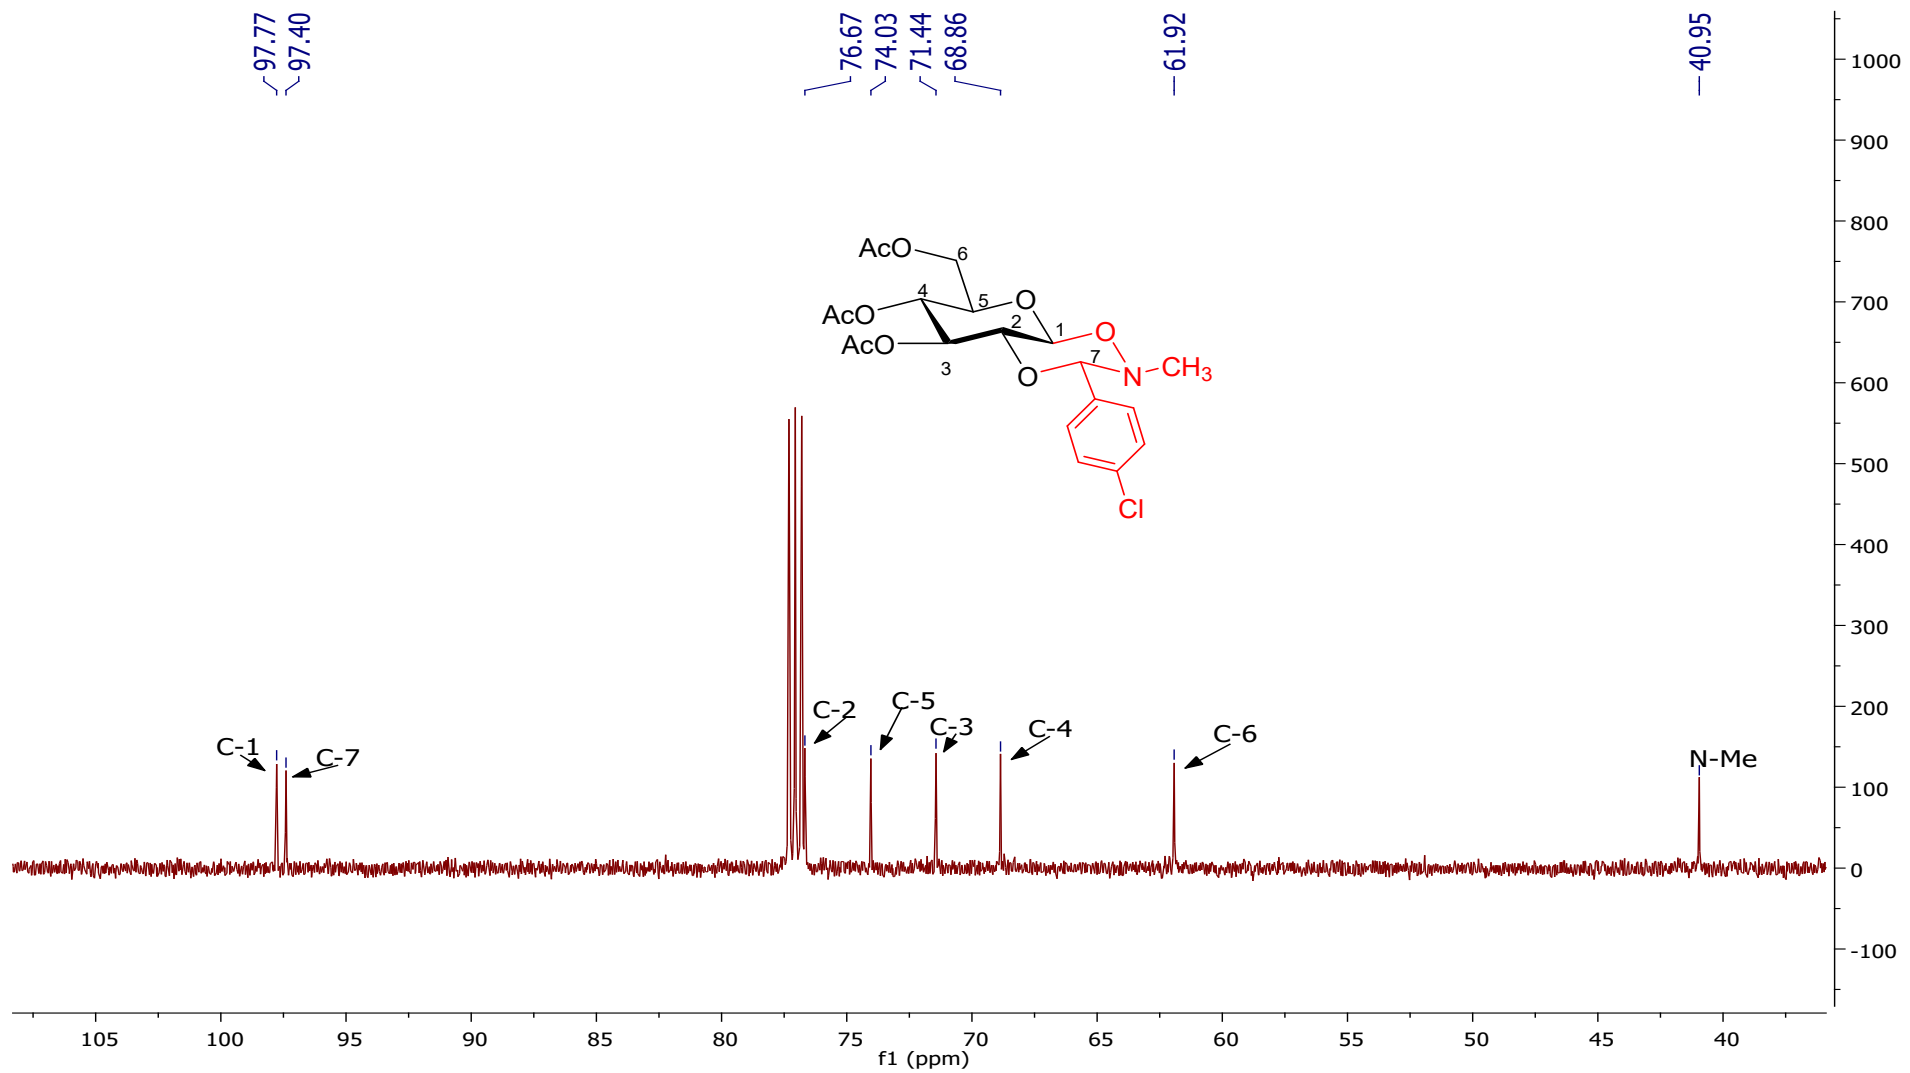

HSQC of compound **3a**

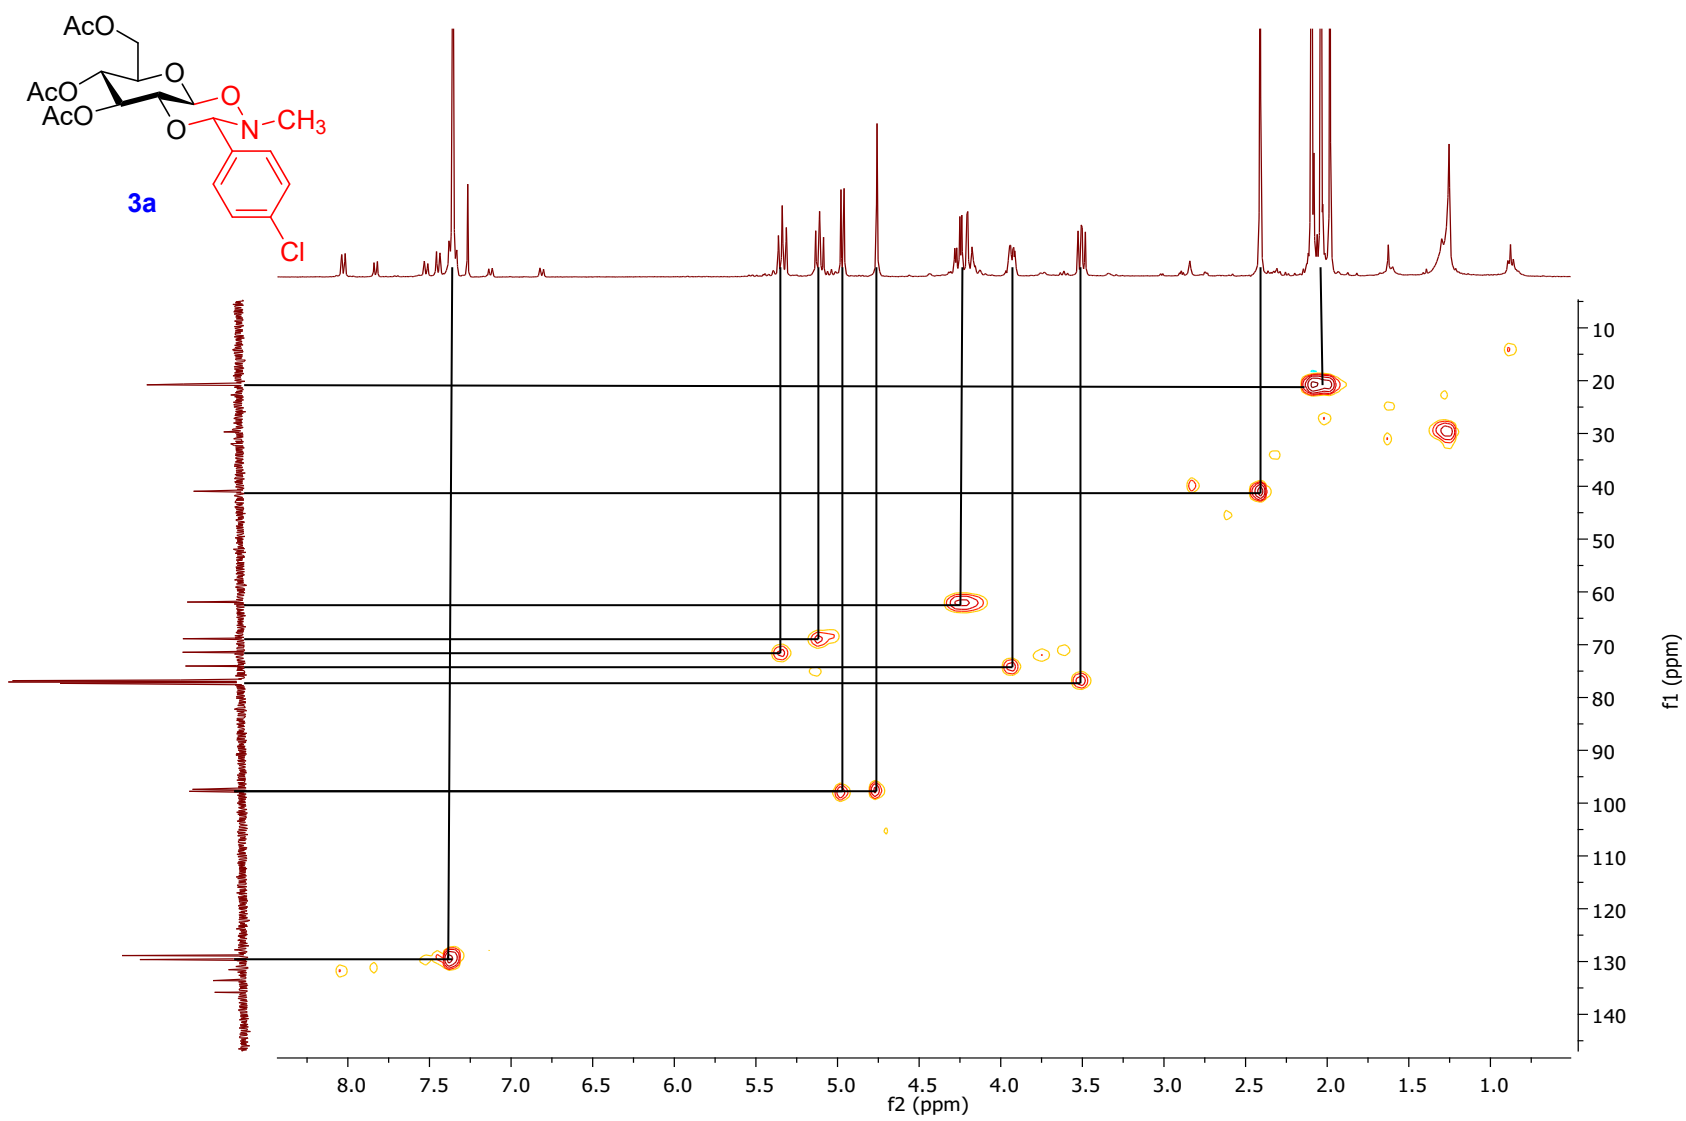



COSY of compound **3a**

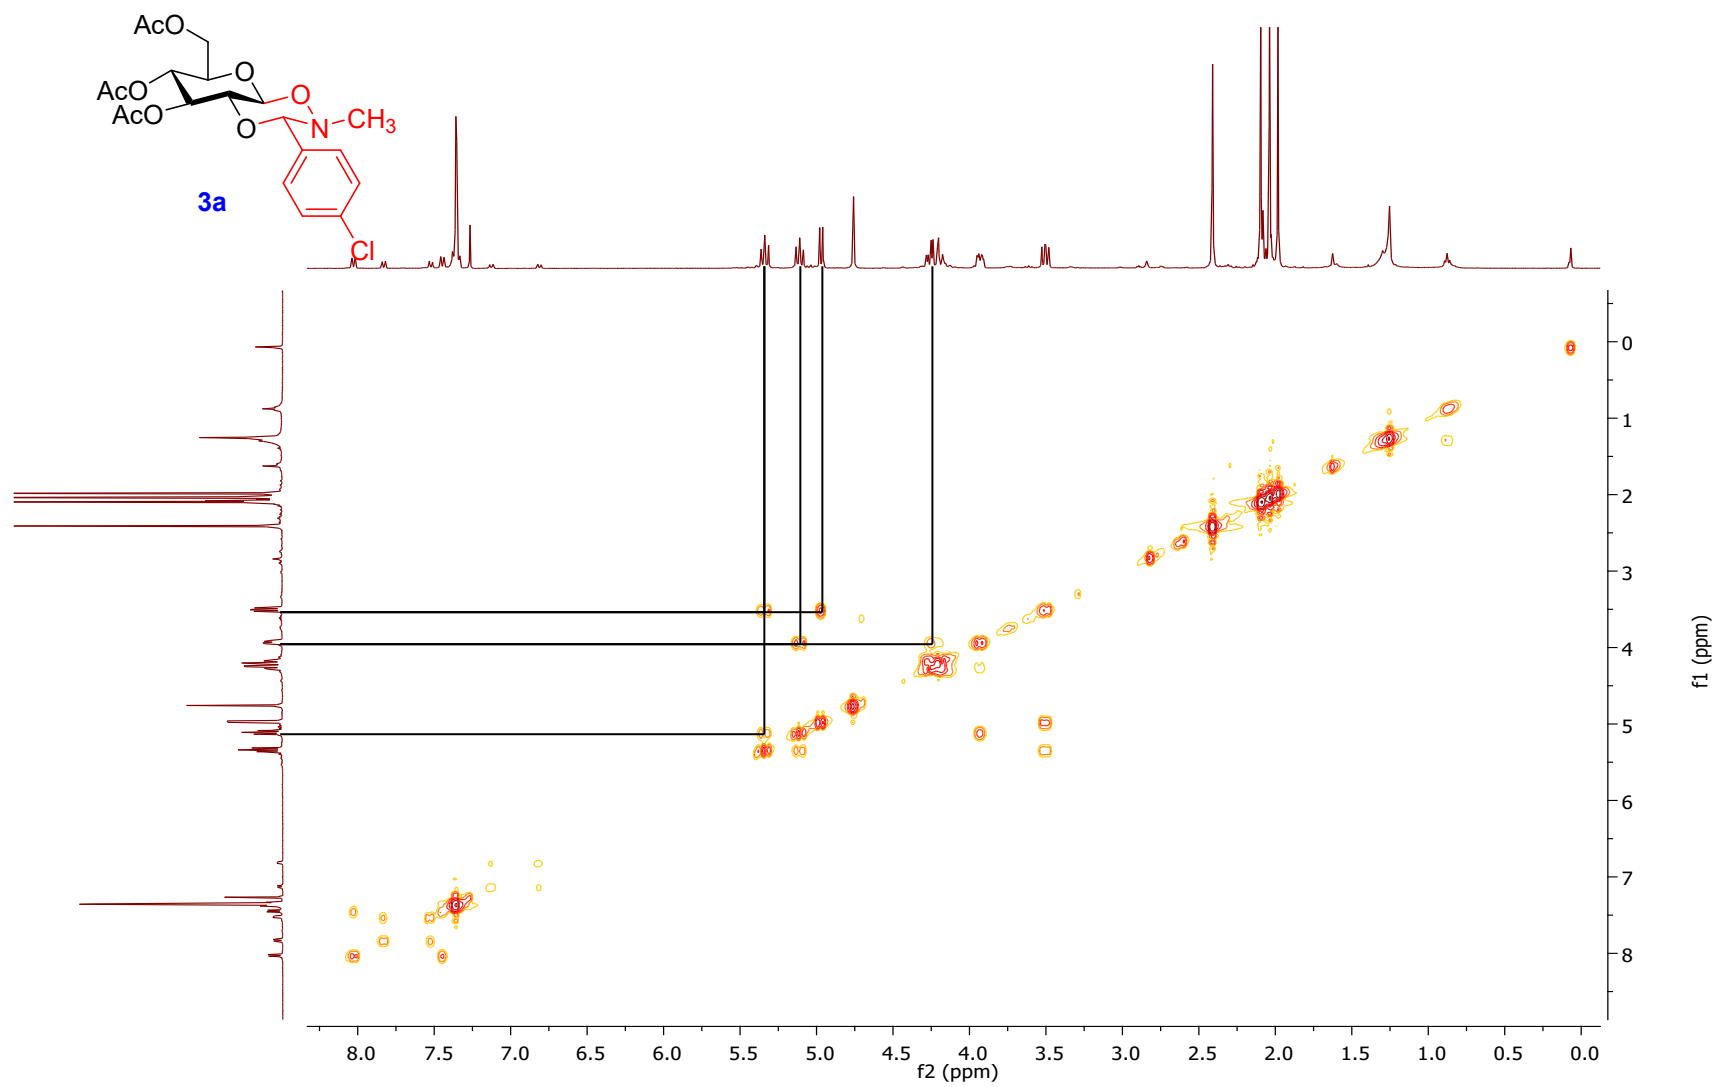

NOESY of compound **3a**

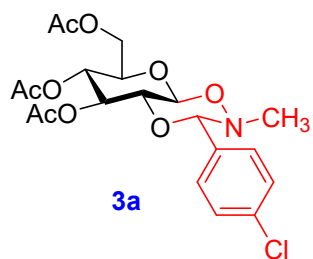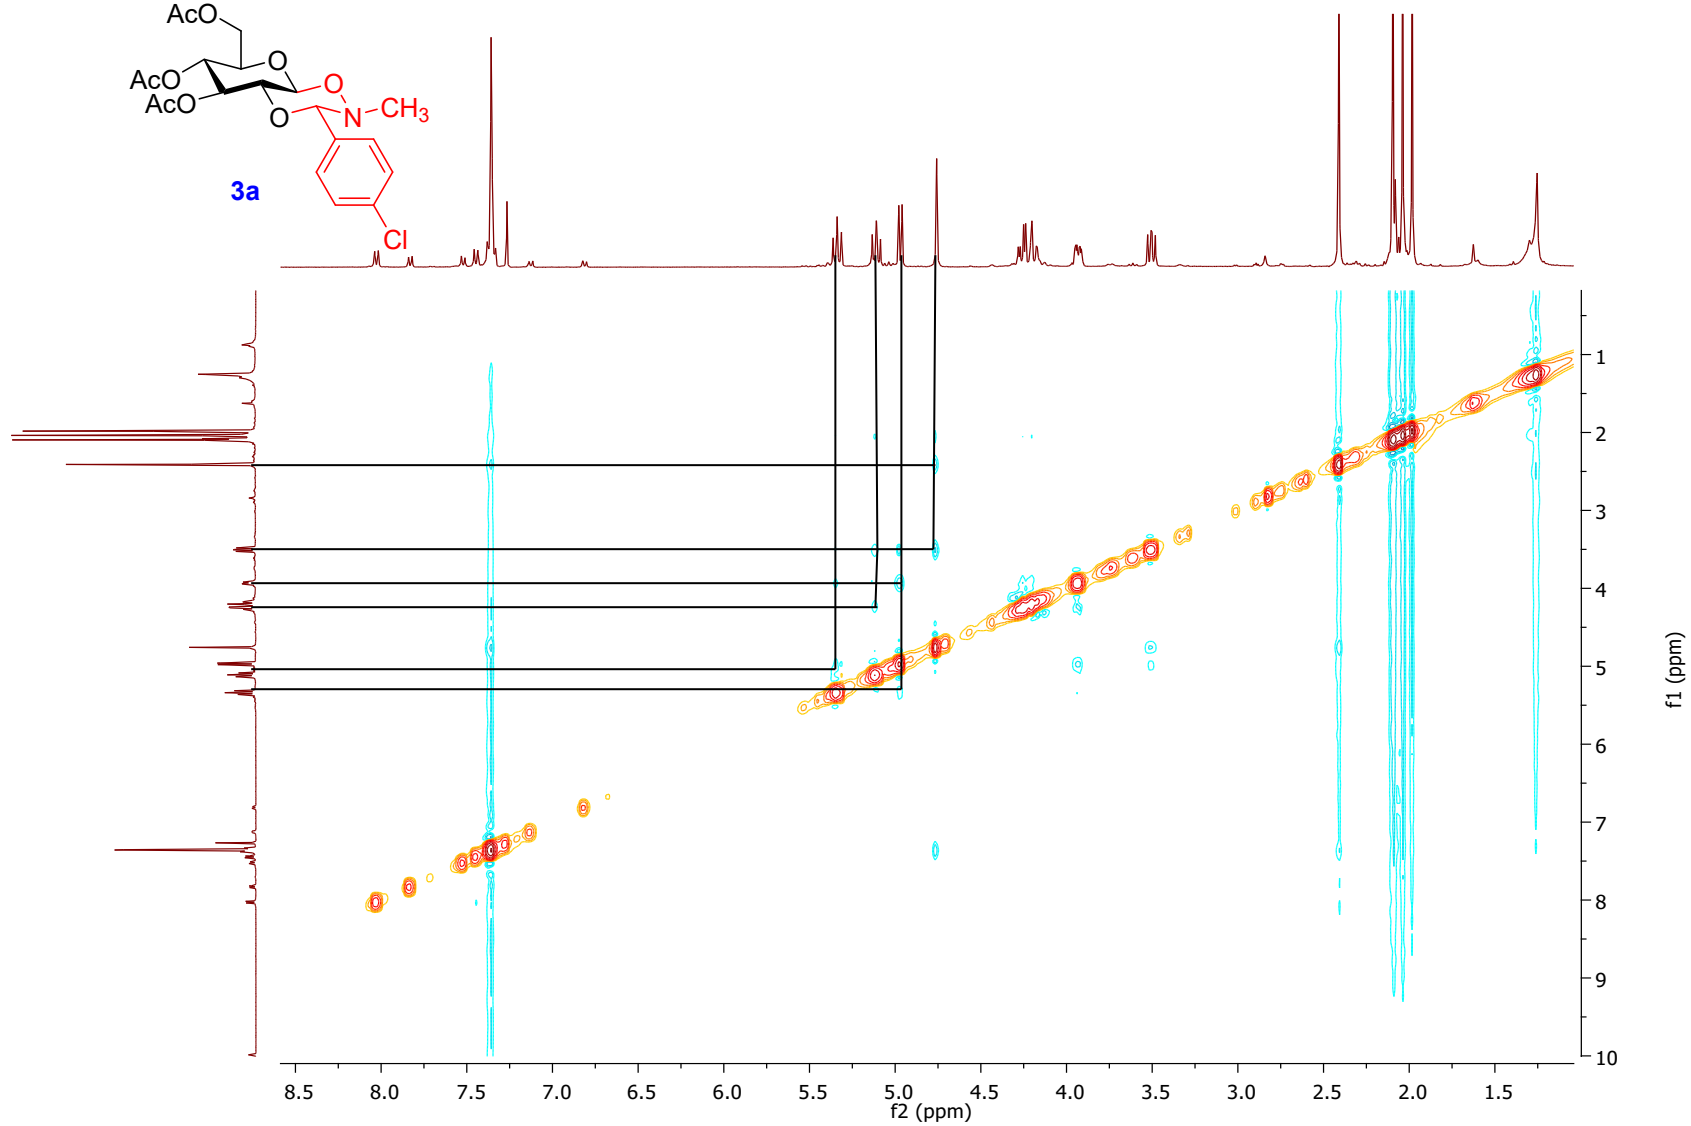

Labeled <sup>1</sup>H of compound 4b

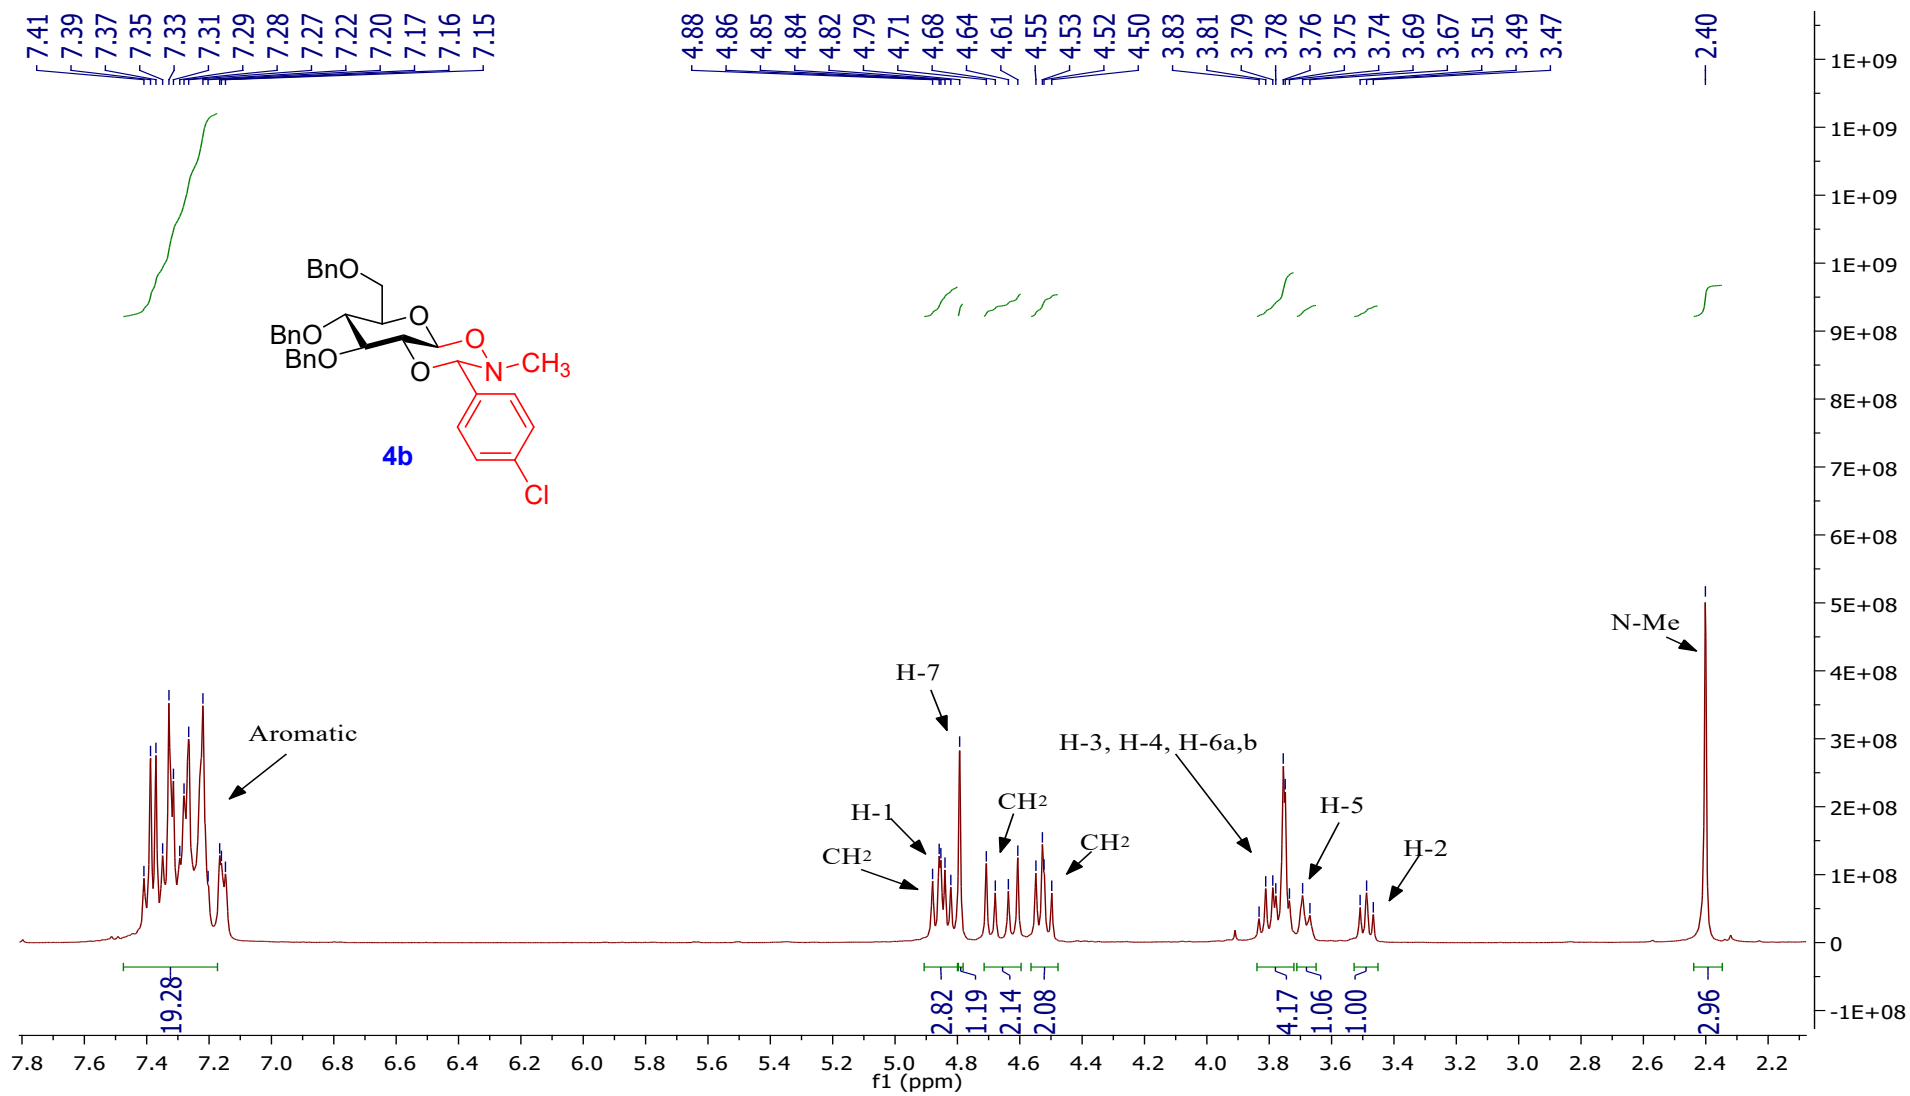

# Labeled <sup>13</sup>C of compound 4b

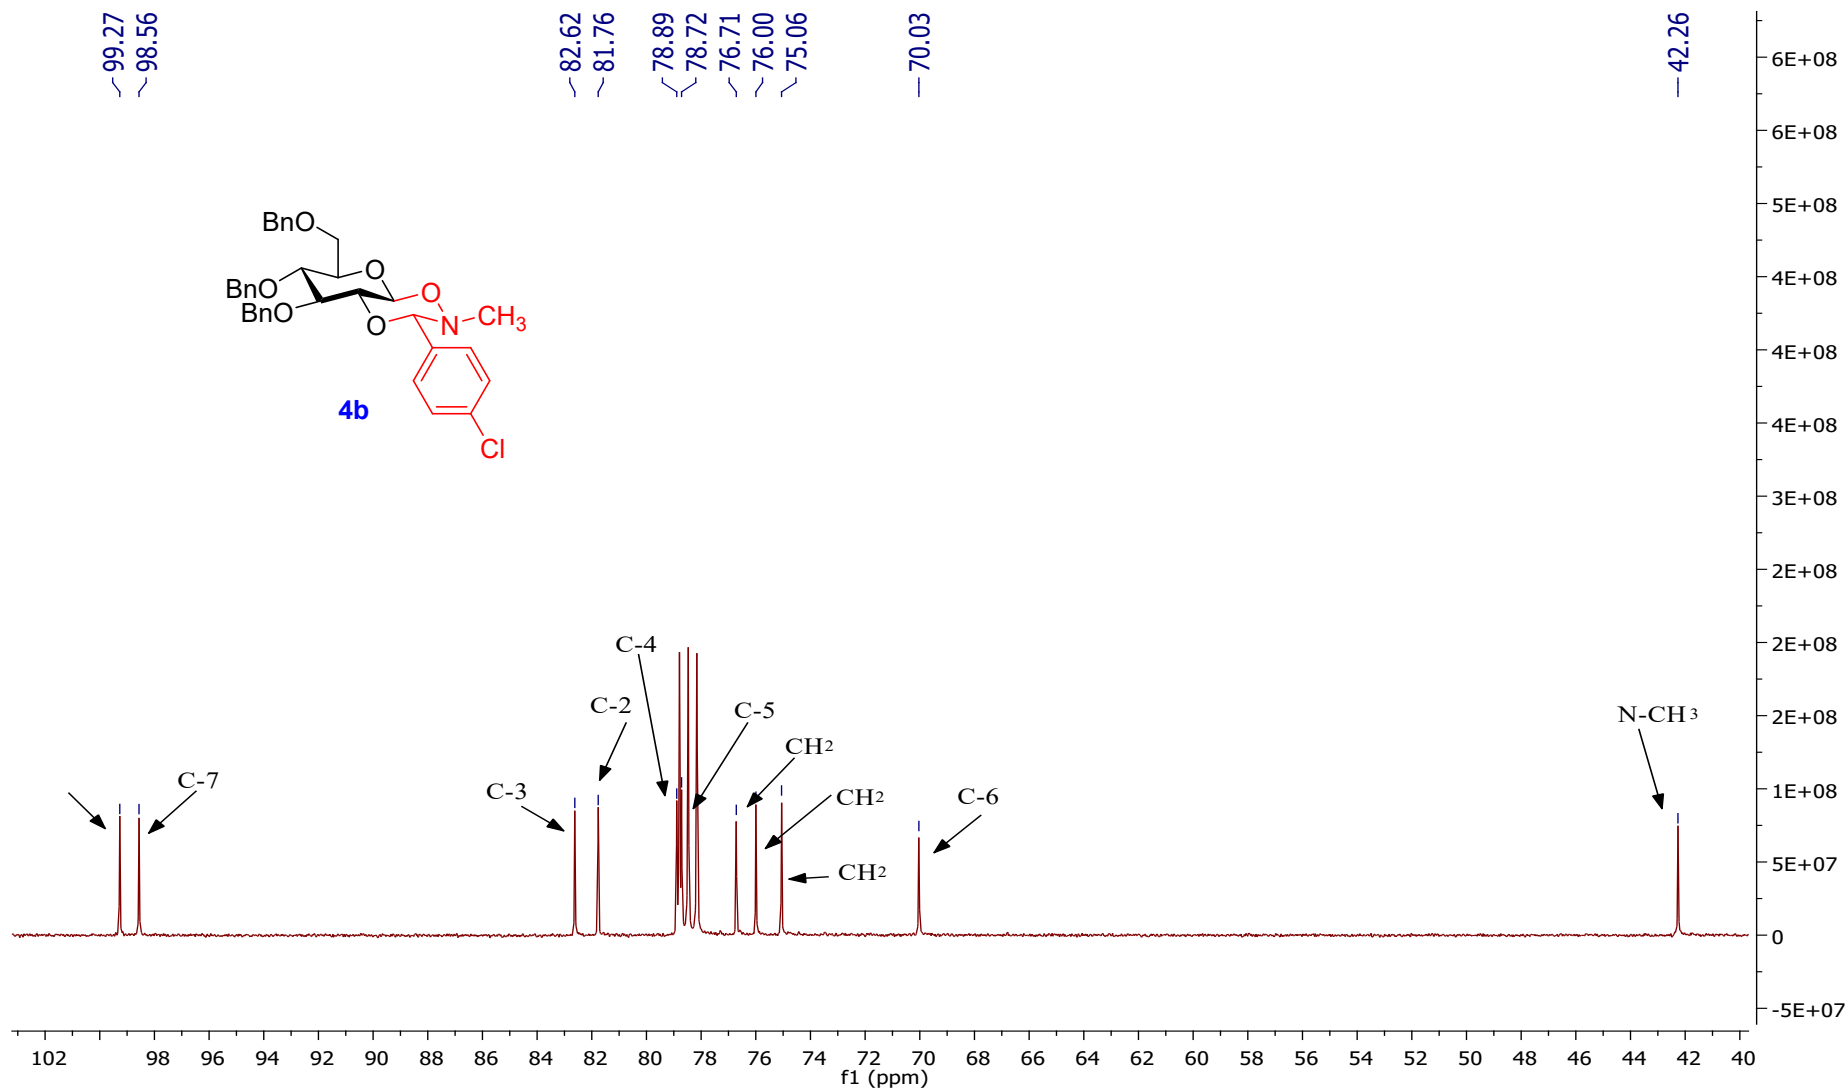

# HSQC of compound 4b

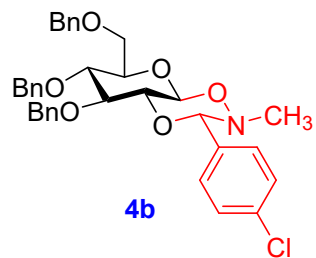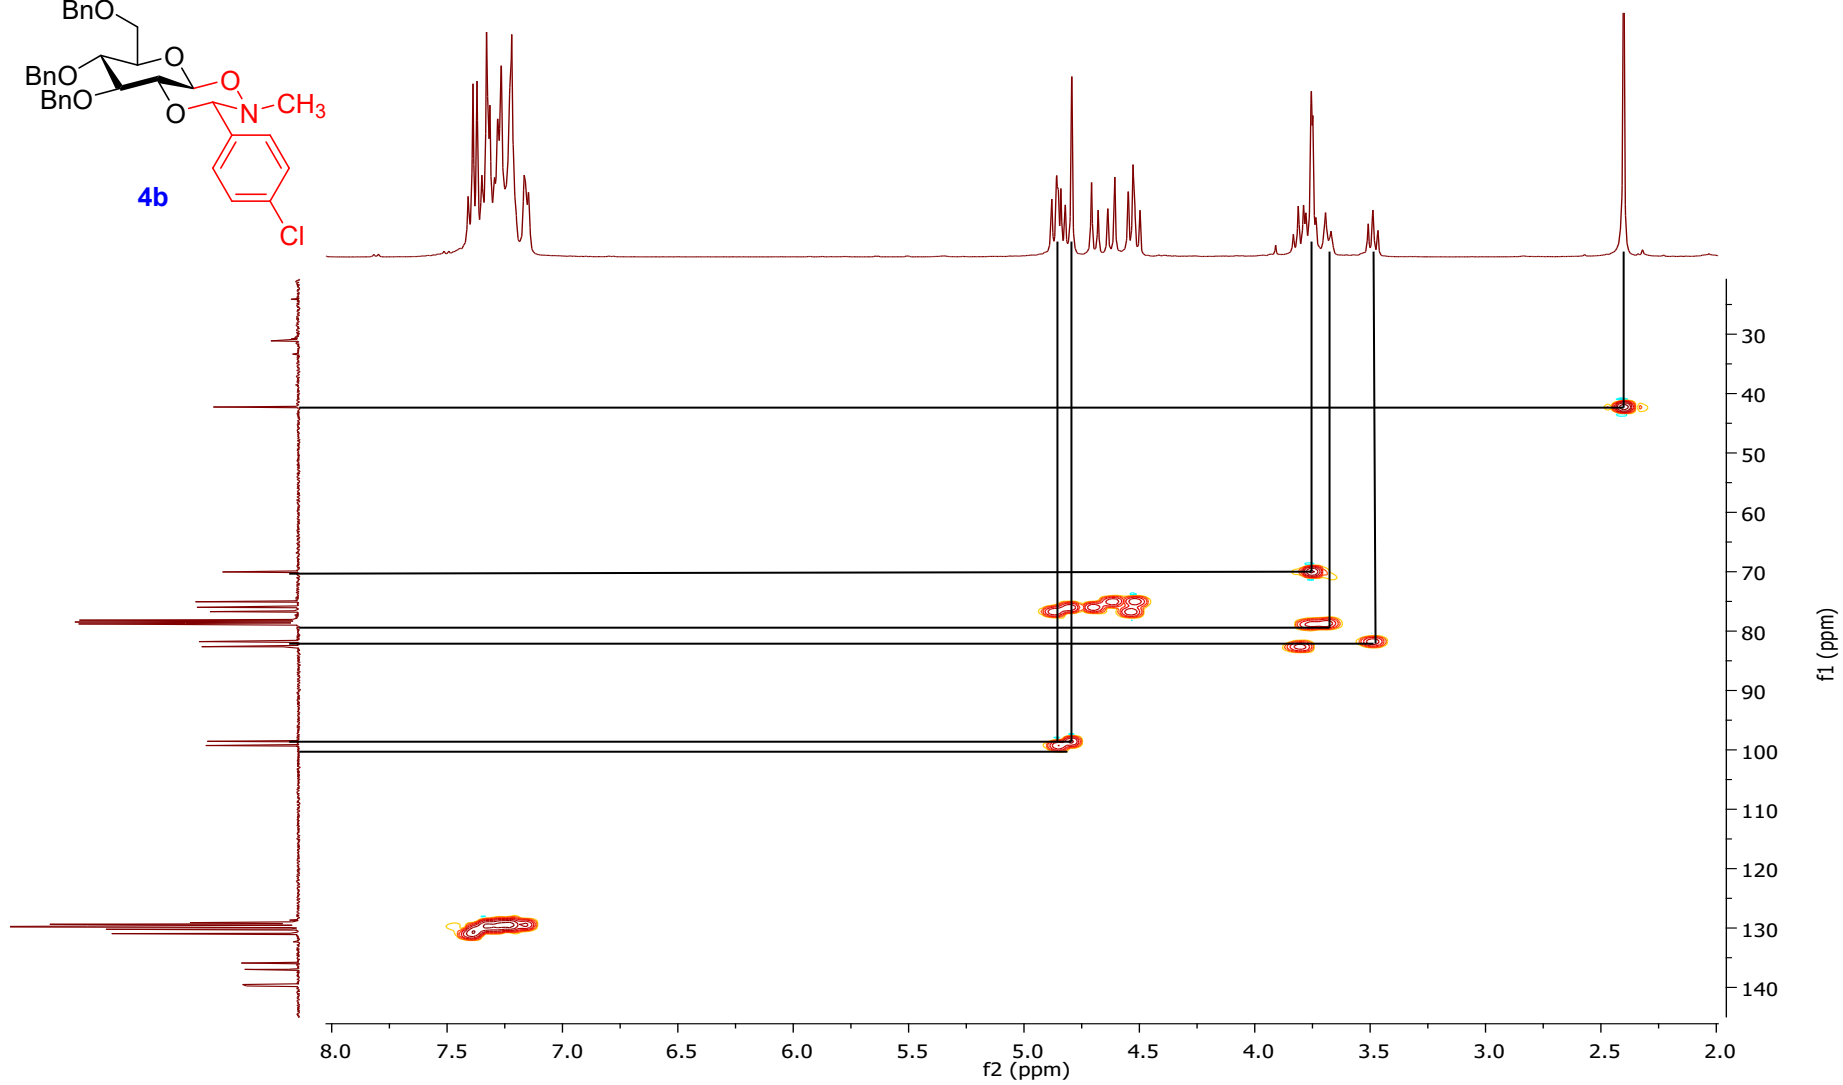

# COSY of Compound 4b

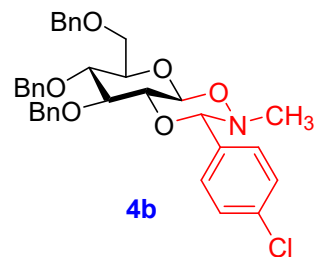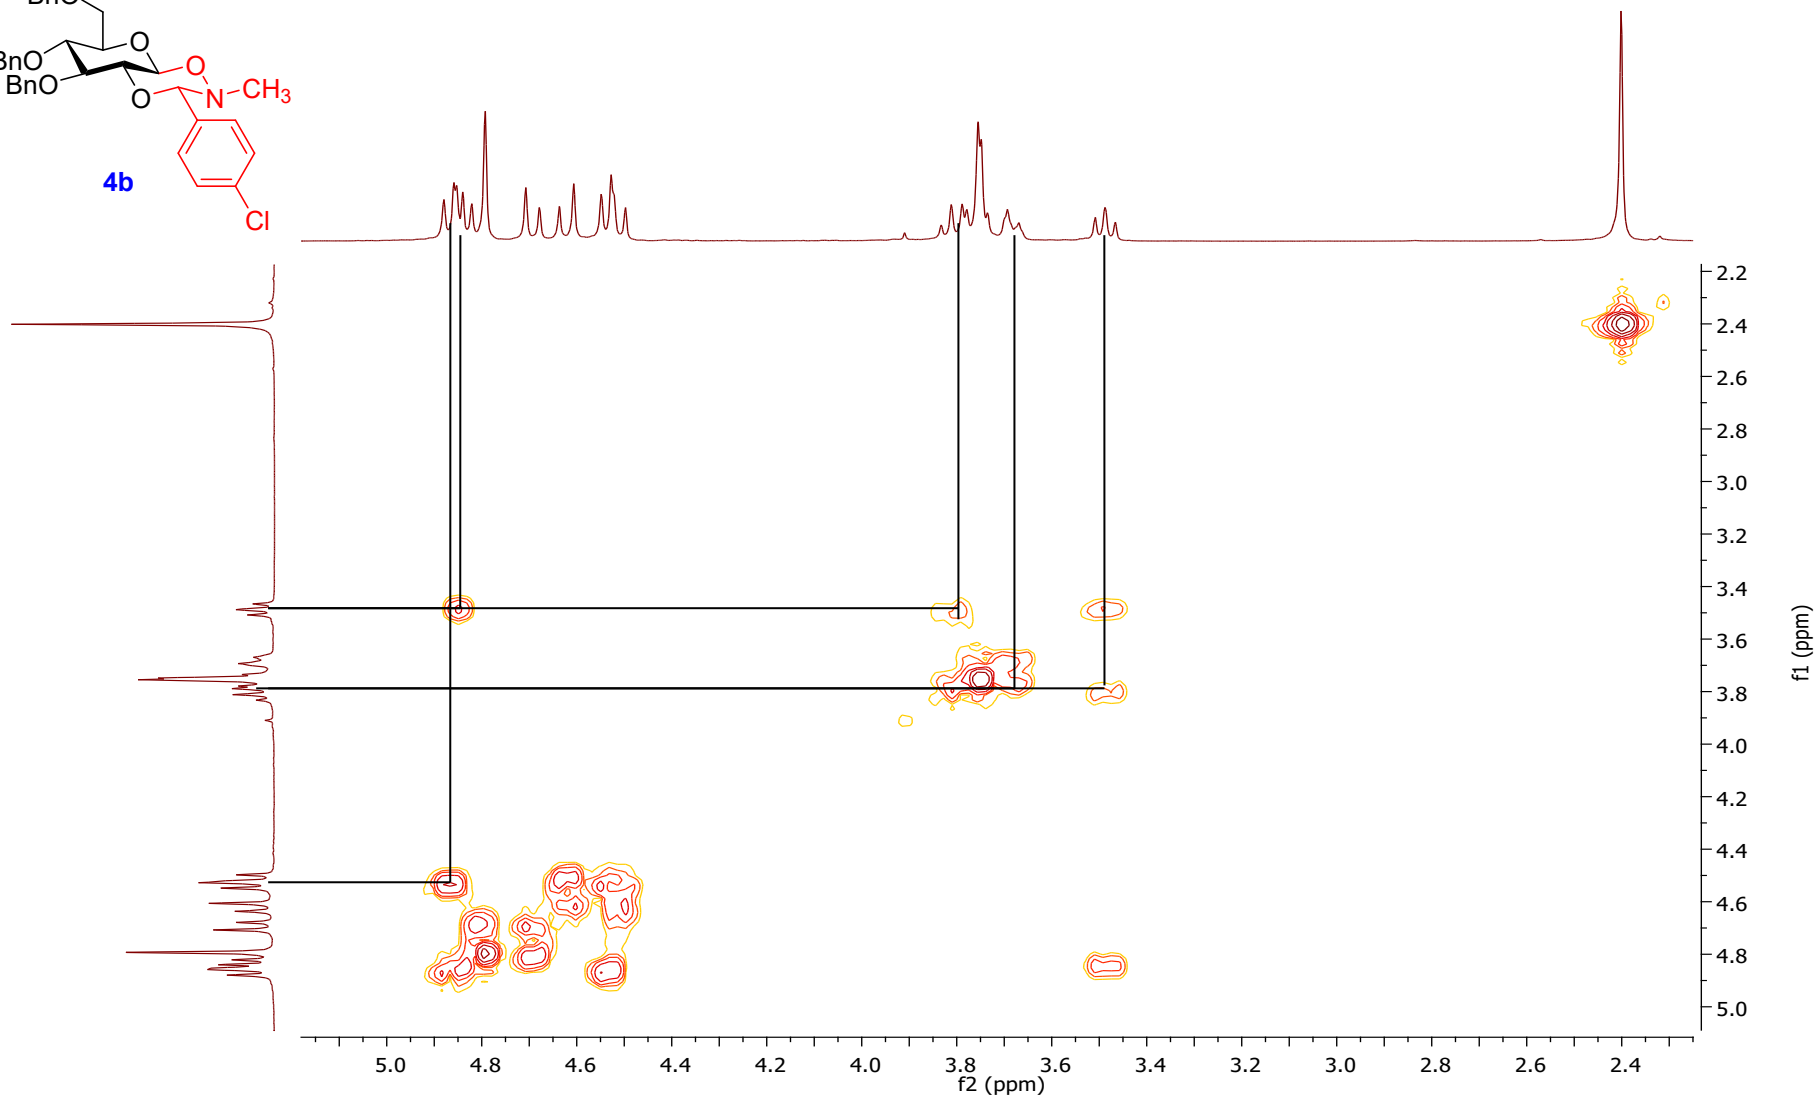

# NOESY of compound 4b

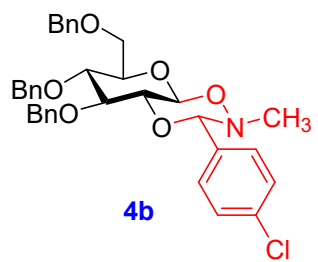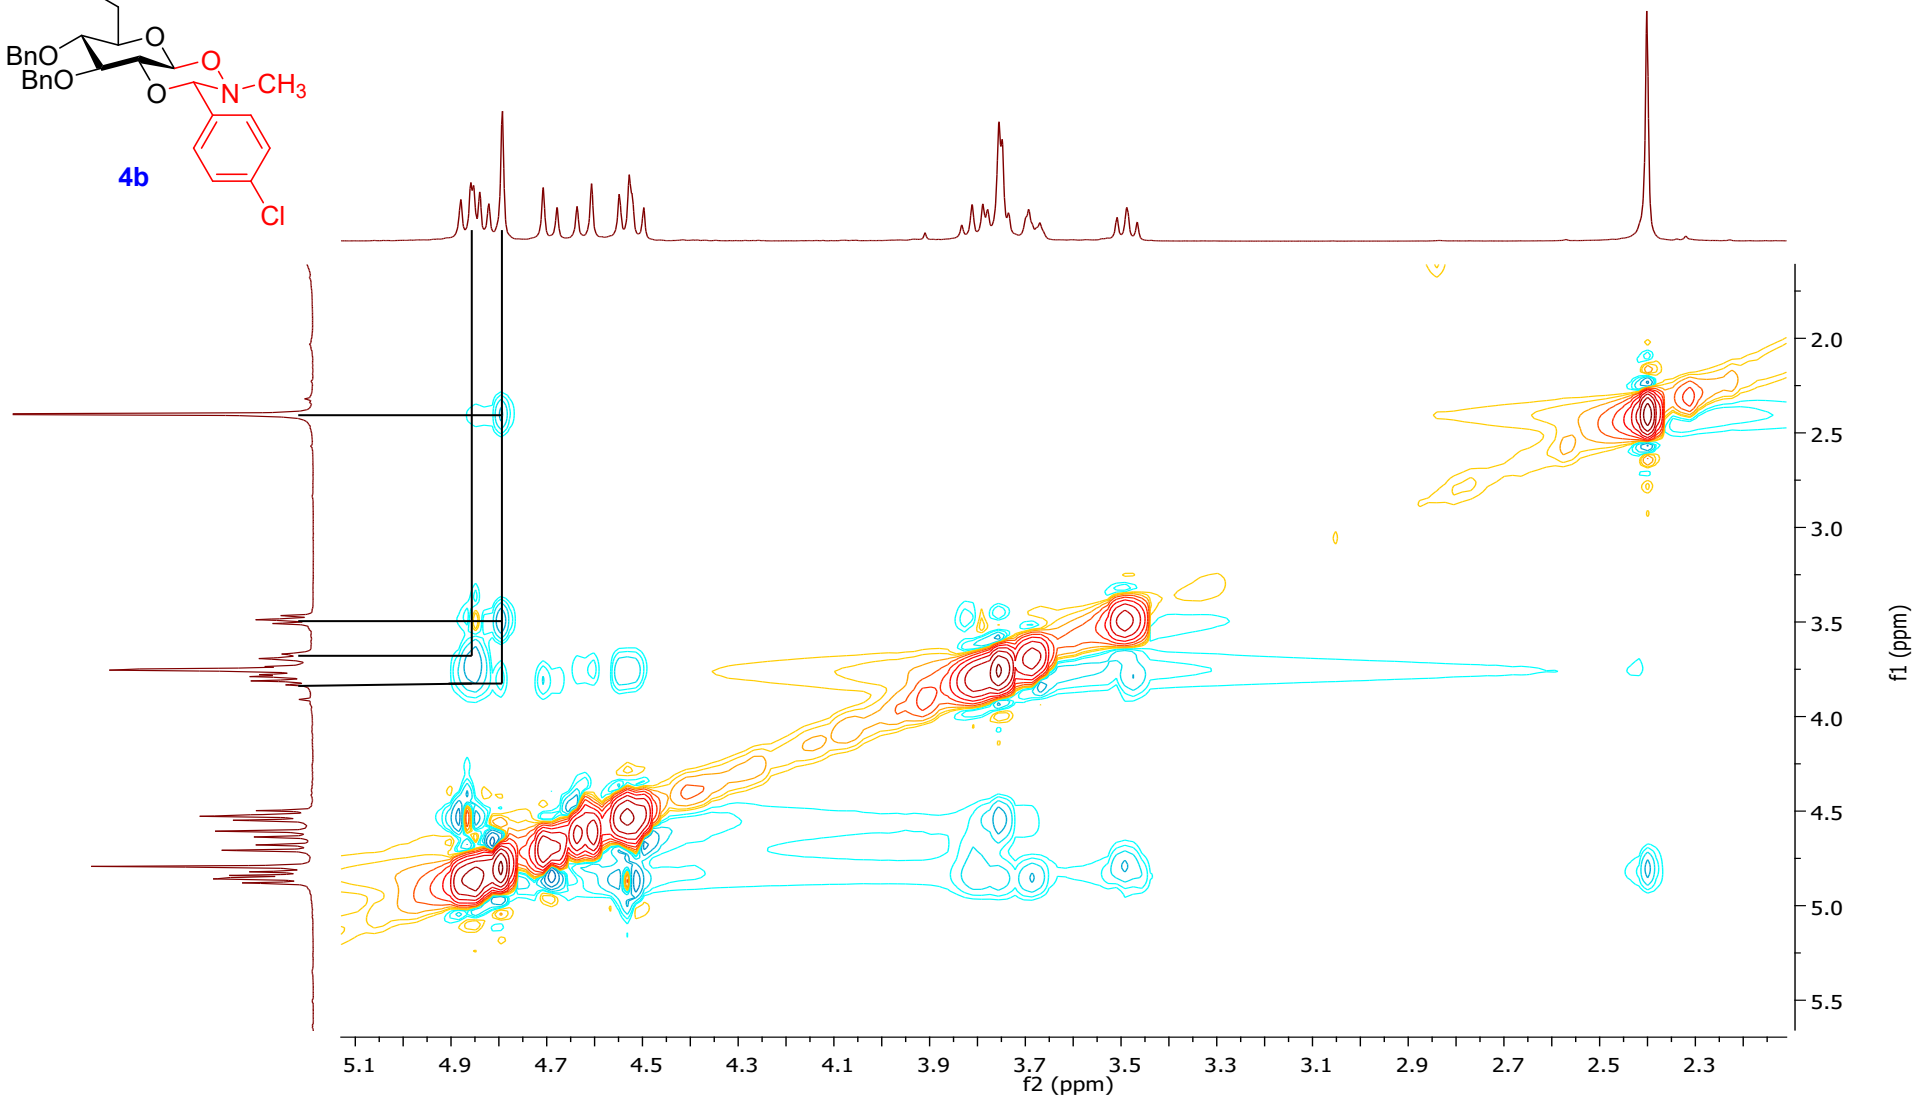

Labeled <sup>1</sup>H of compound 4j

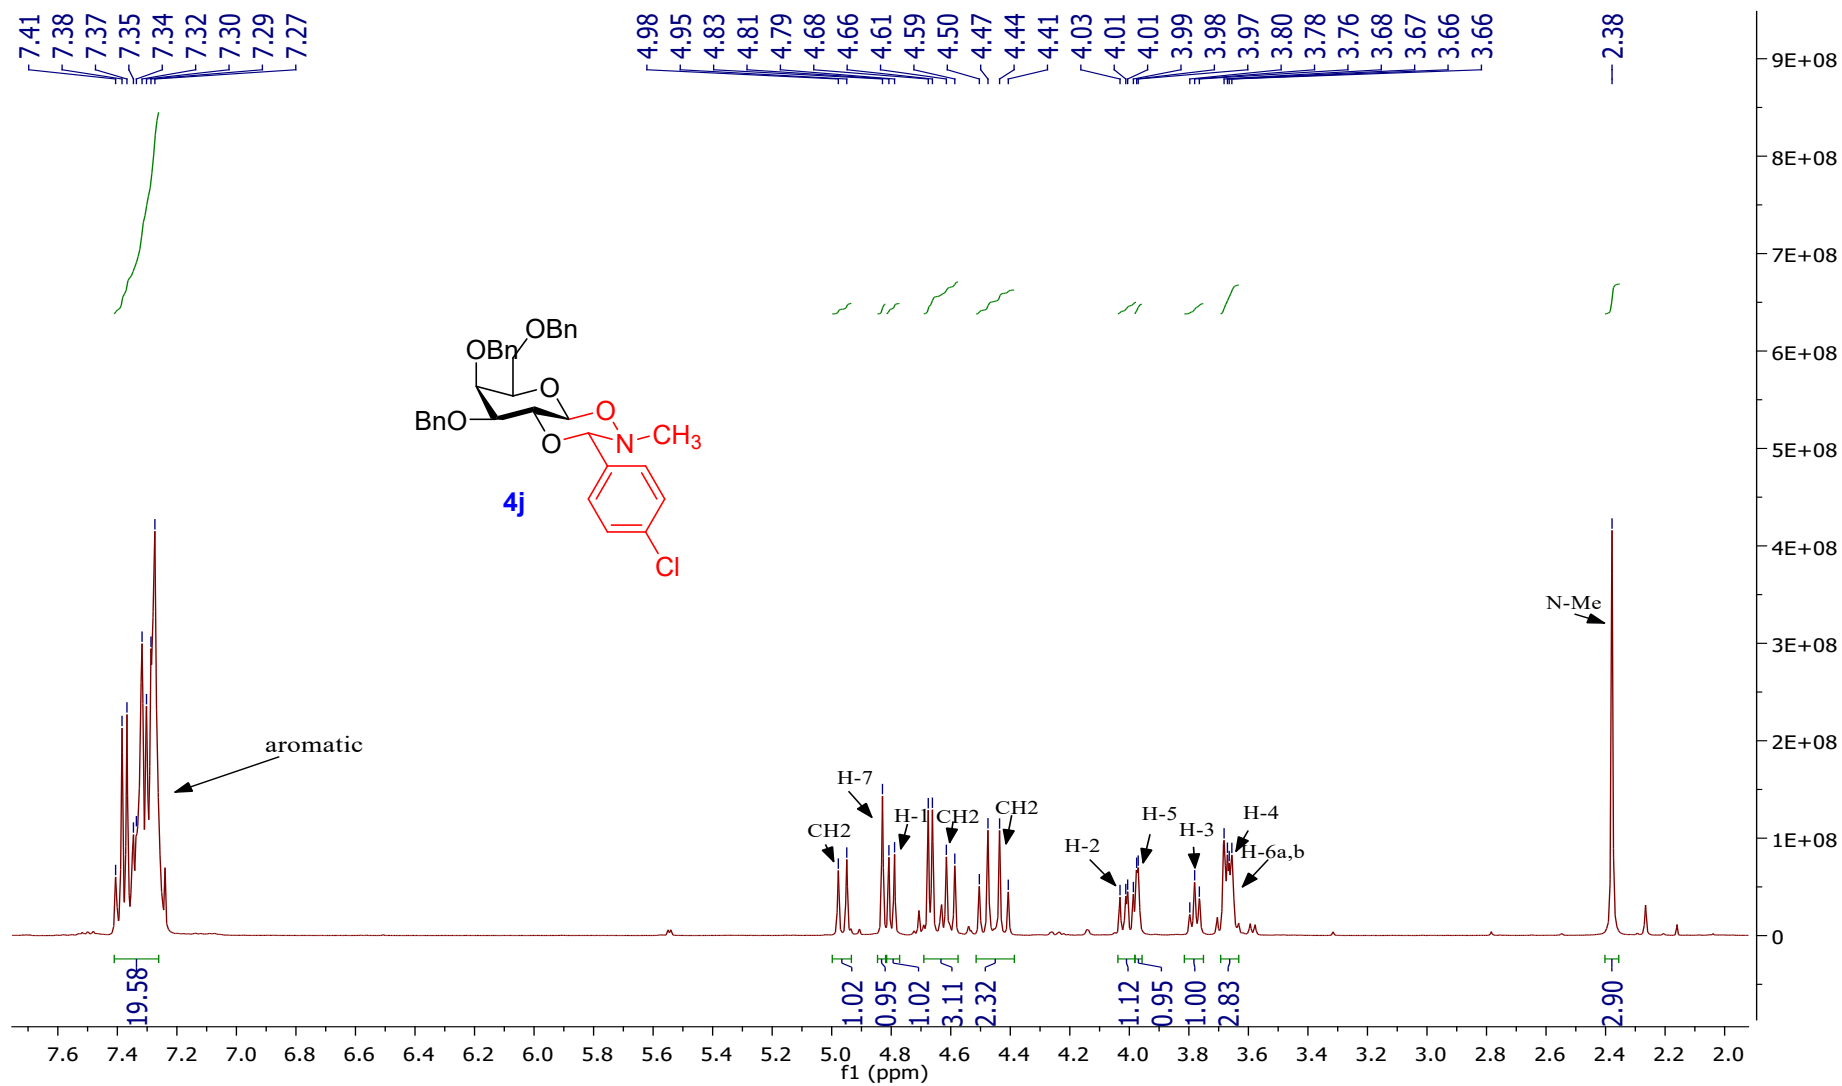



# Labeled <sup>13</sup>C of compound 4j

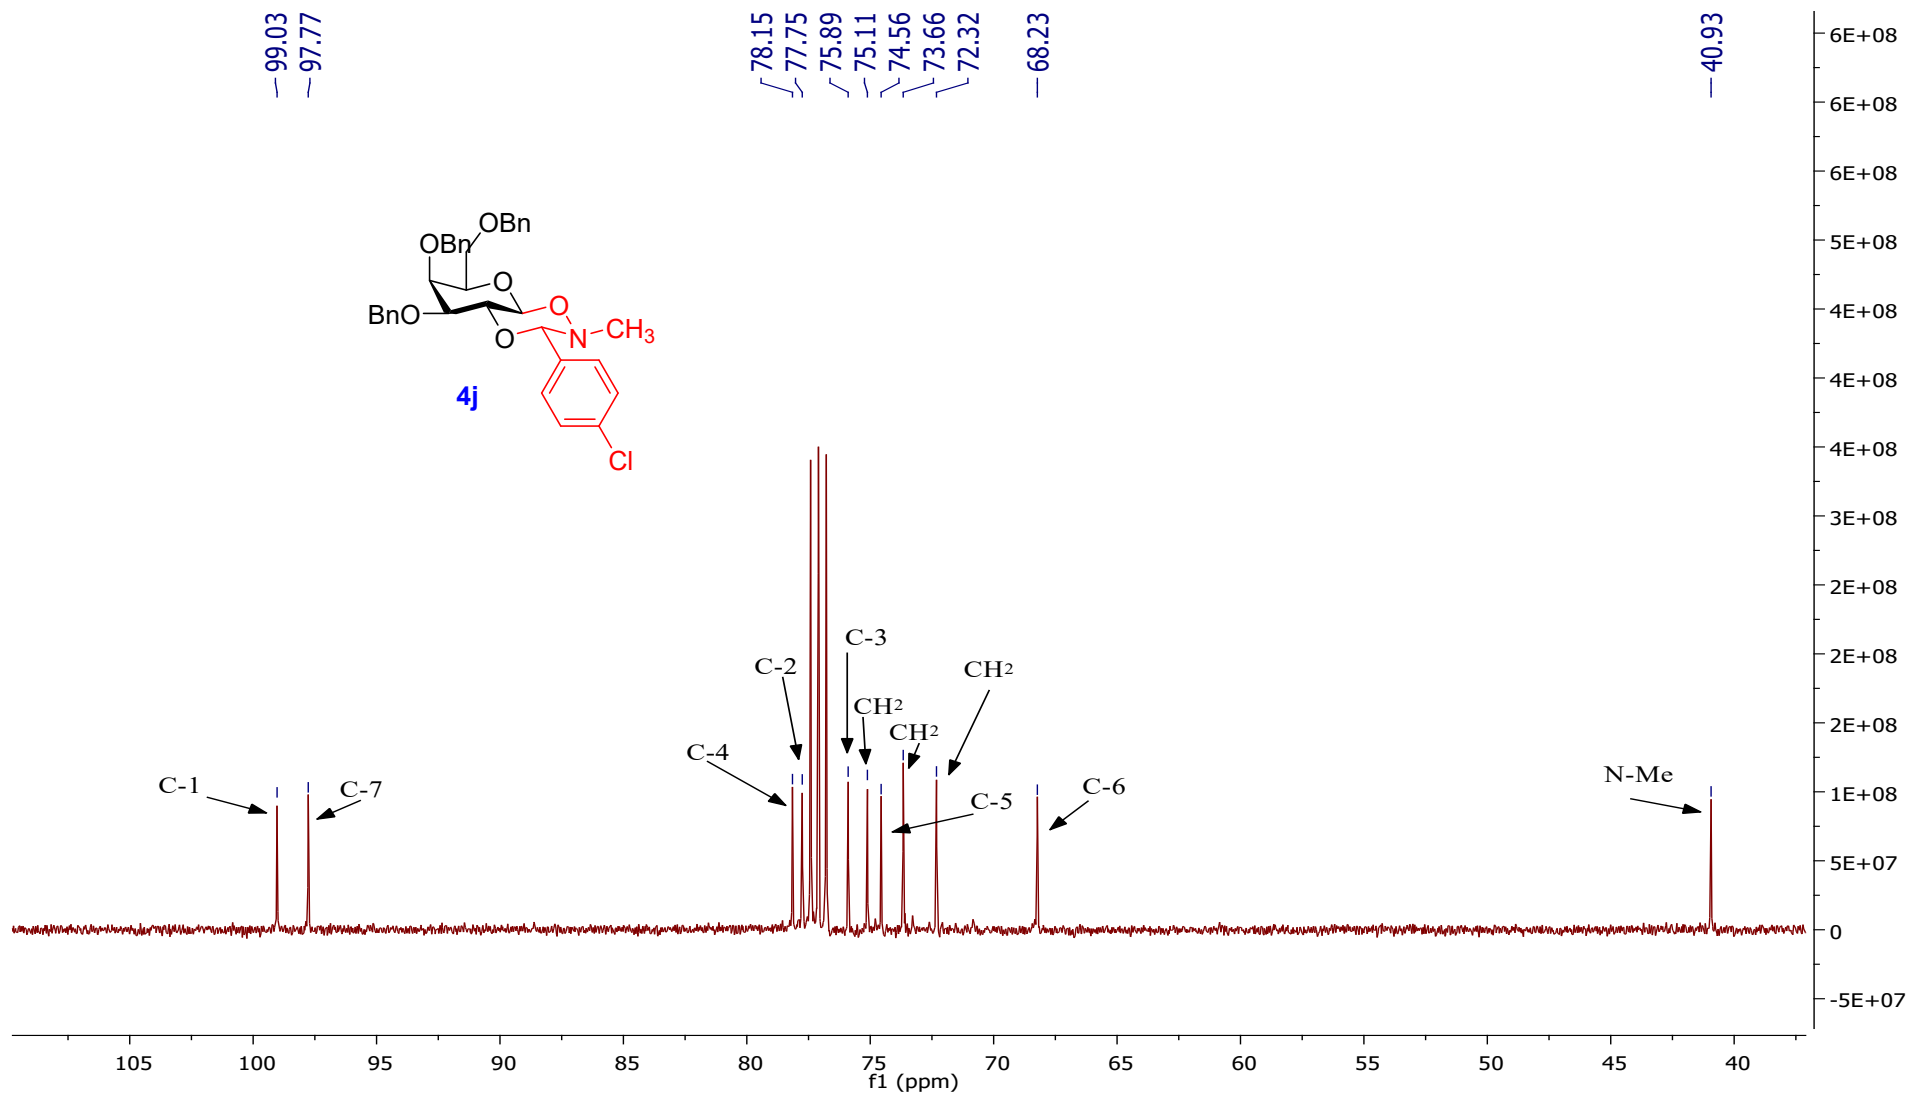

# HSQC correlation of 4j

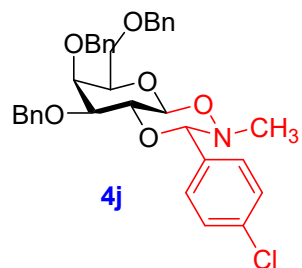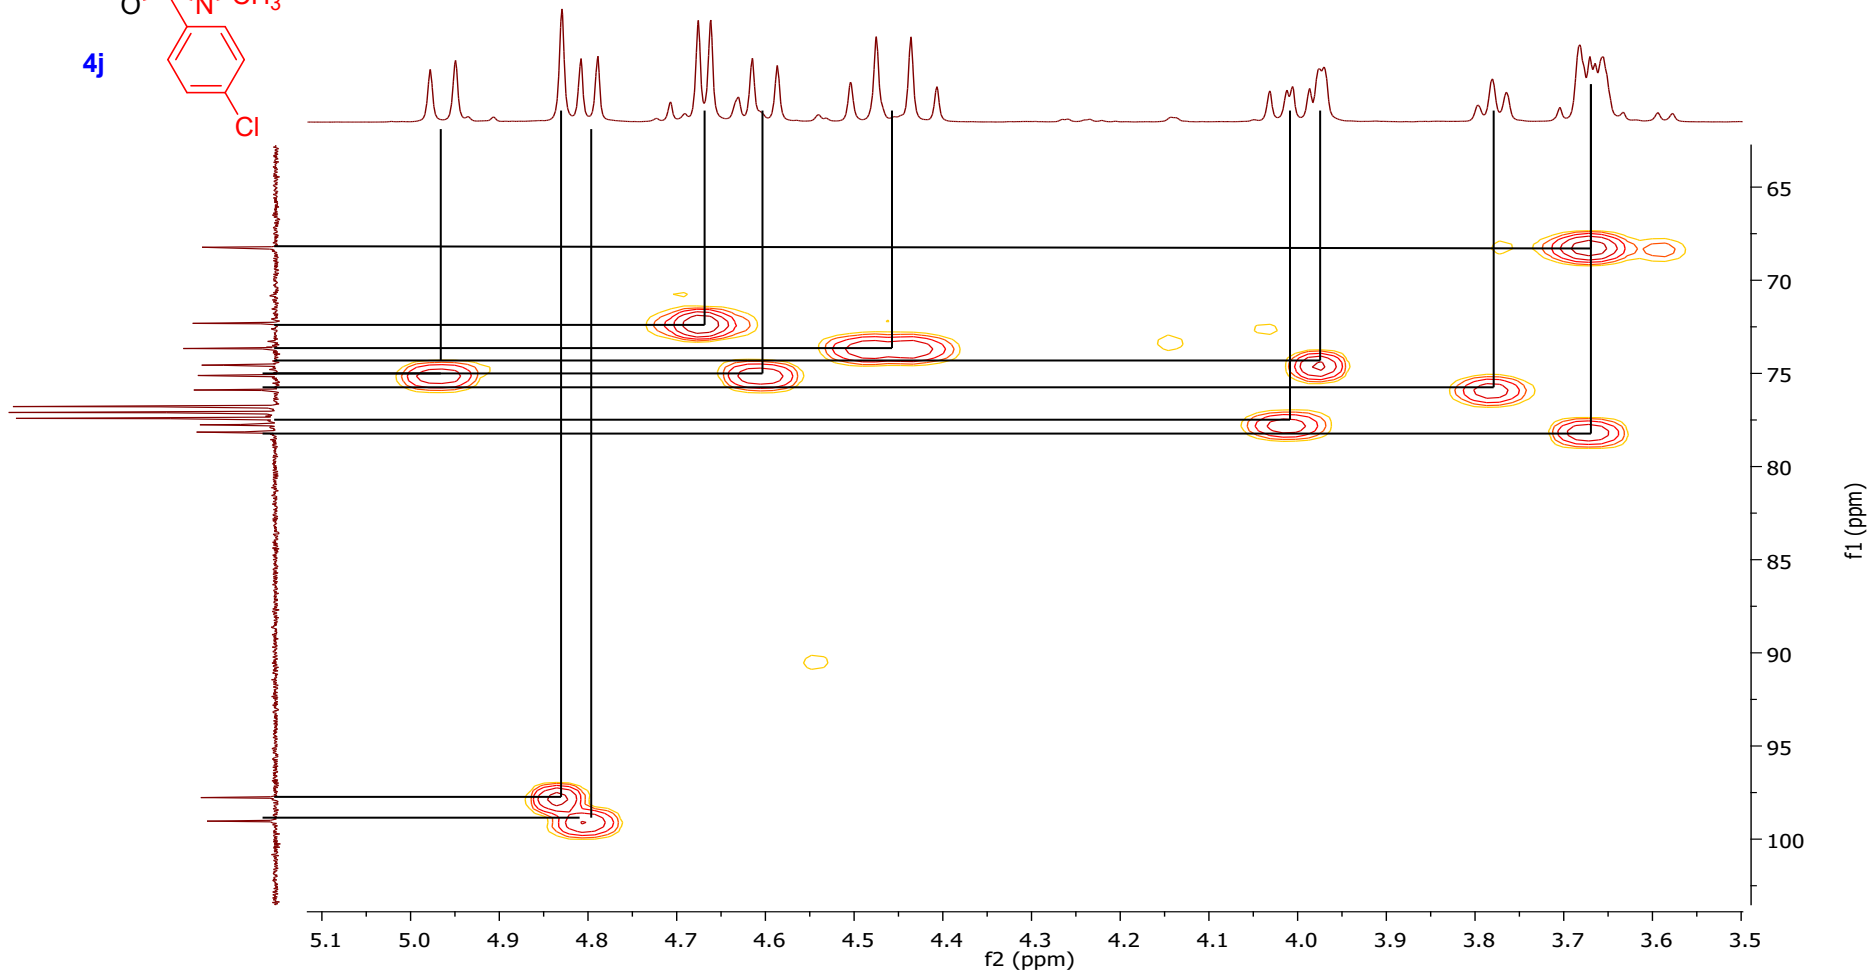

### COSY correlation of 4j

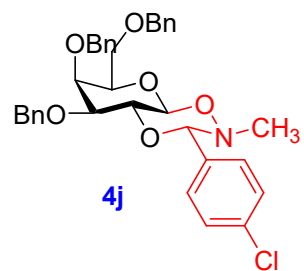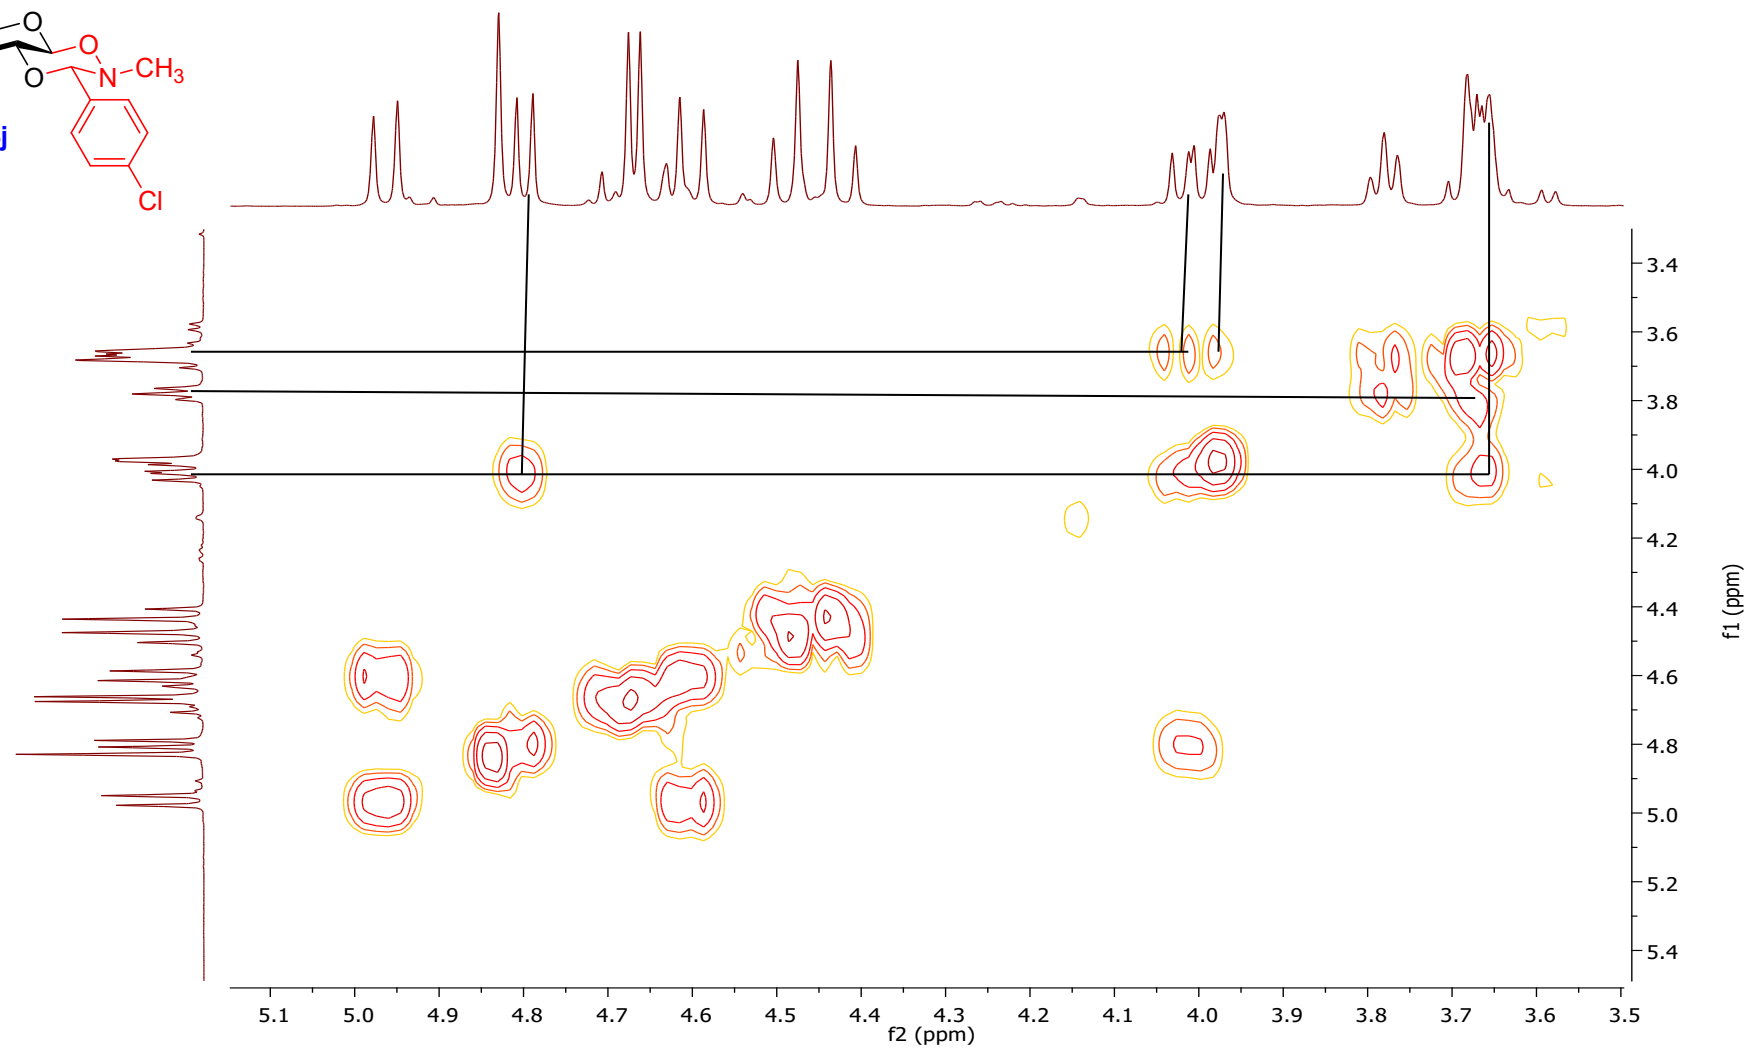

### NOESY correlation of 4j

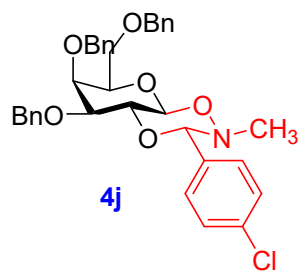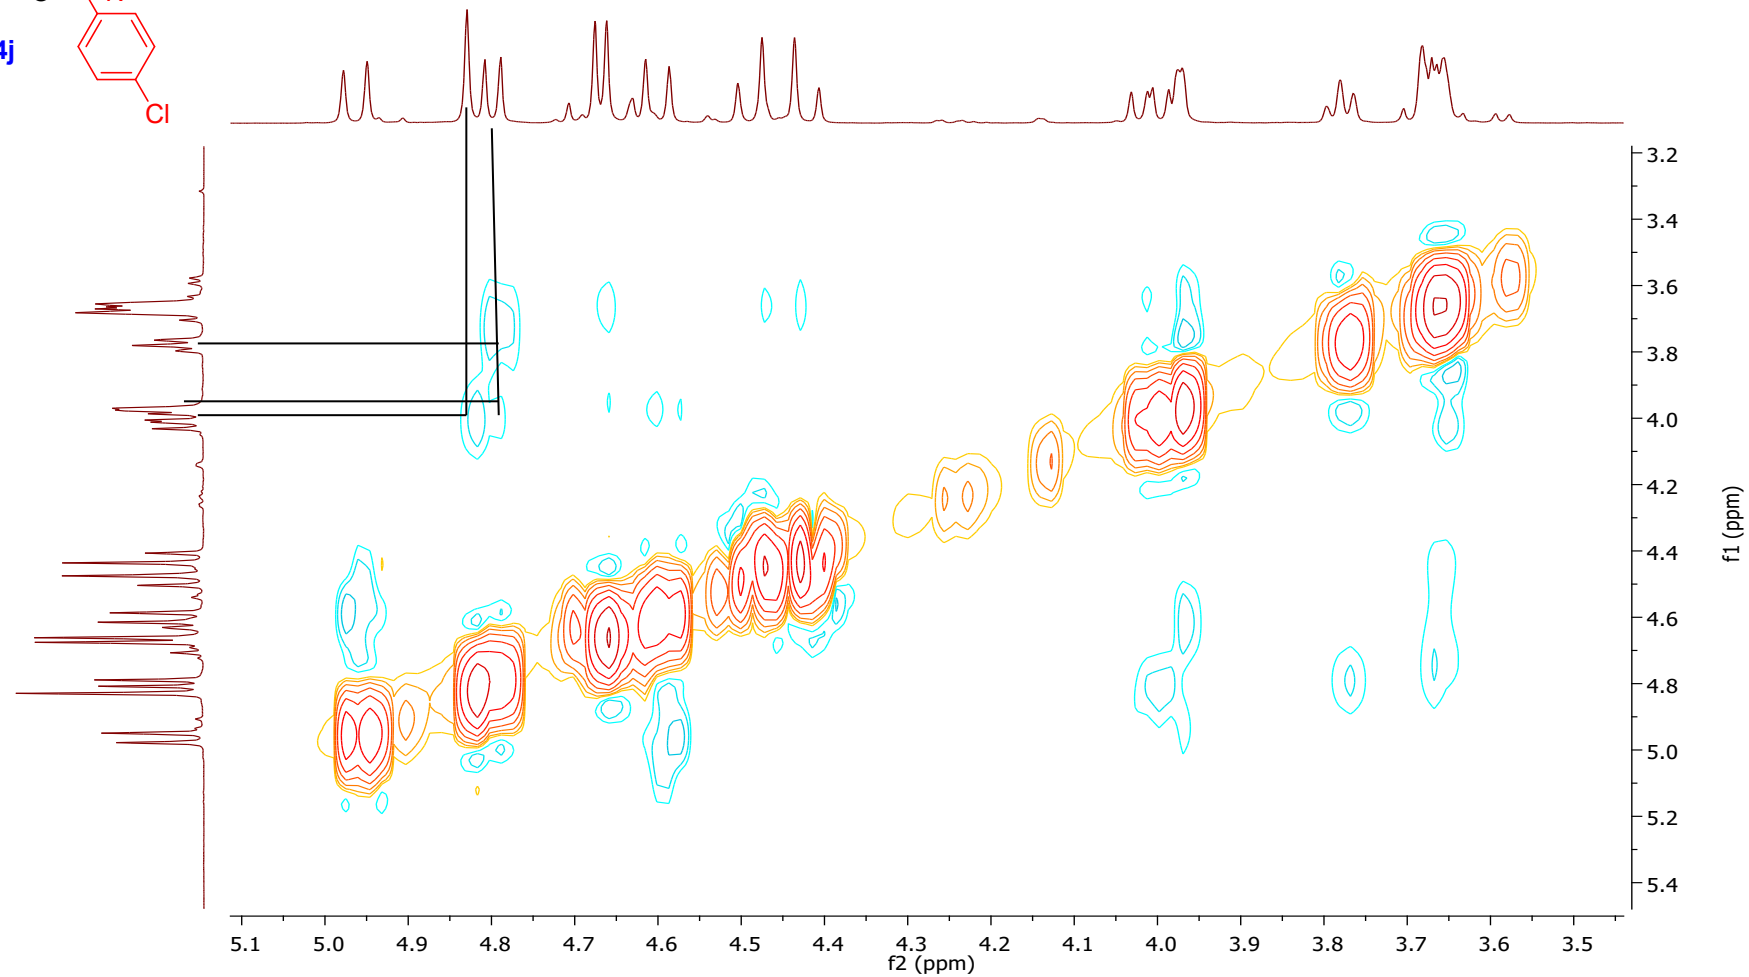

Supplement: d1ob02310a1.pdf [file d1ob02310a1.pdf]
